# Supplementary material for: Resolving sub-clonal heterogeneity within cell-line growths by single cell sequencing genomic DNA
Source: bioRxiv preprint, doi:10.1101/757211, version 1 (2019-09-05)
Supplement: Supplemental files [file 757211_file02.pdf]

## **SUPPLEMENTARY INFORMATION**

### **Resolving sub-clonal heterogeneity within cell-line growths by single cell sequencing genomic DNA**

Enrique I. Velazquez-Villarreal<sup>1,\*</sup>, Shamoni Maheshwari<sup>2,\*</sup>, Jon Sorenson<sup>2</sup>, Ian T. Fiddes<sup>2</sup>, Vijay Kumar<sup>2</sup>, Yifeng Yin<sup>2</sup>, Michelle Webb<sup>1</sup>, Claudia Catalanotti<sup>2</sup>, Mira Grigorova<sup>3</sup>, Paul A. Edwards<sup>3,4</sup>, John D. Carpten<sup>1</sup>, David W. Craig<sup>1</sup>

\*These authors contributed equally to this work.

## **INSTITUTIONS**

<sup>1</sup>Department of Translational Genomics, Keck School of Medicine of University of Southern California, Los Angeles CA, United States

<sup>2</sup>10X Genomics, Pleasanton CA, United States

<sup>3</sup>Cancer Research UK Cambridge Institute, Cambridge, United Kingdom

<sup>4</sup>Hutchison-MRC Research Centre, University of Cambridge, Cambridge, United Kingdom

## **CORRESPONDING AUTHORS**

Enrique I. Velazquez-Villarreal

Email: [eivelazq@usc.edu](mailto:eivelazq@usc.edu)

David W. Craig

Email: [davidwcr@usc.edu](mailto:davidwcr@usc.edu)

## **TABLE OF CONTENTS**

|                                |               |
|--------------------------------|---------------|
| <b>Supplementary Figures</b>   | Pages 1 - 11  |
| <b>Supplementary Tables</b>    | Pages 12 - 64 |
| <b>Supplementary Documents</b> | Pages 65 - 67 |

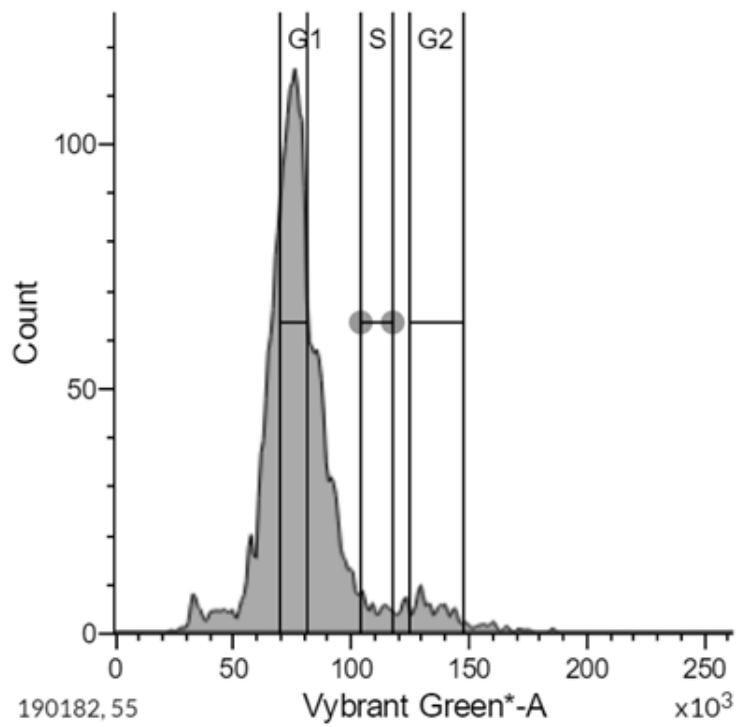

**Supplementary Figure 1 | Distribution of DNA content in COLO829 nuclei by flow cytometry.**  
Cells in the G1 phase were selected for scCNV library preparation.

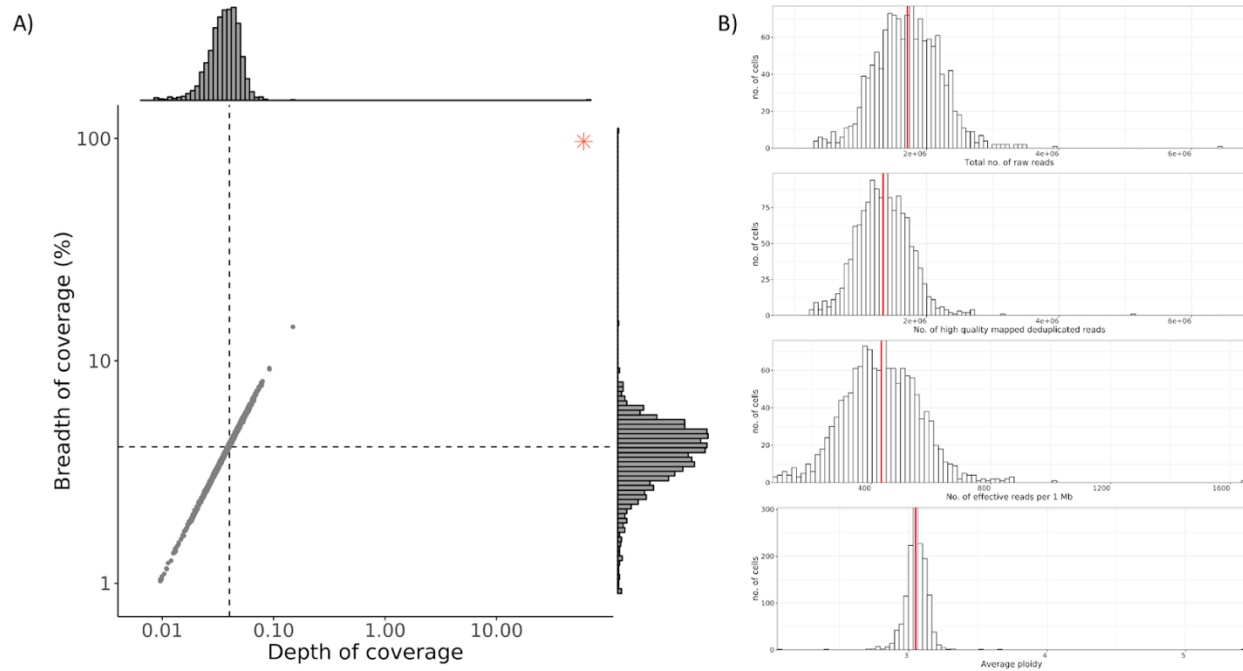

**Supplementary Figure 2 | Sequencing depth . A)** Depth of coverage versus breadth of coverage. A scatter plot depicted the effective depth of coverage (x-axis) versus the percent of the genome with at least 1x coverage (y-axis) for each cell. The dashed lines represent the median single cell values (0.04 depth of coverage, 4.11 breadth of coverage). The red asterisk plots the values for aggregated data as a pseudo bulk experiment (60.68x depth of coverage, 95.97% breadth of coverage). **B)** Histogram of summary data quality metrics. Histogram depicting the distribution of per cell summary metrics with the median indicated by the red line: Total number of raw reads (median value 1,709,262); Number of high quality mapped deduplicated reads (median value 1,343,083); Number of effective reads per 1 Mb (median value 434) and Average ploidy (median value 3.048).

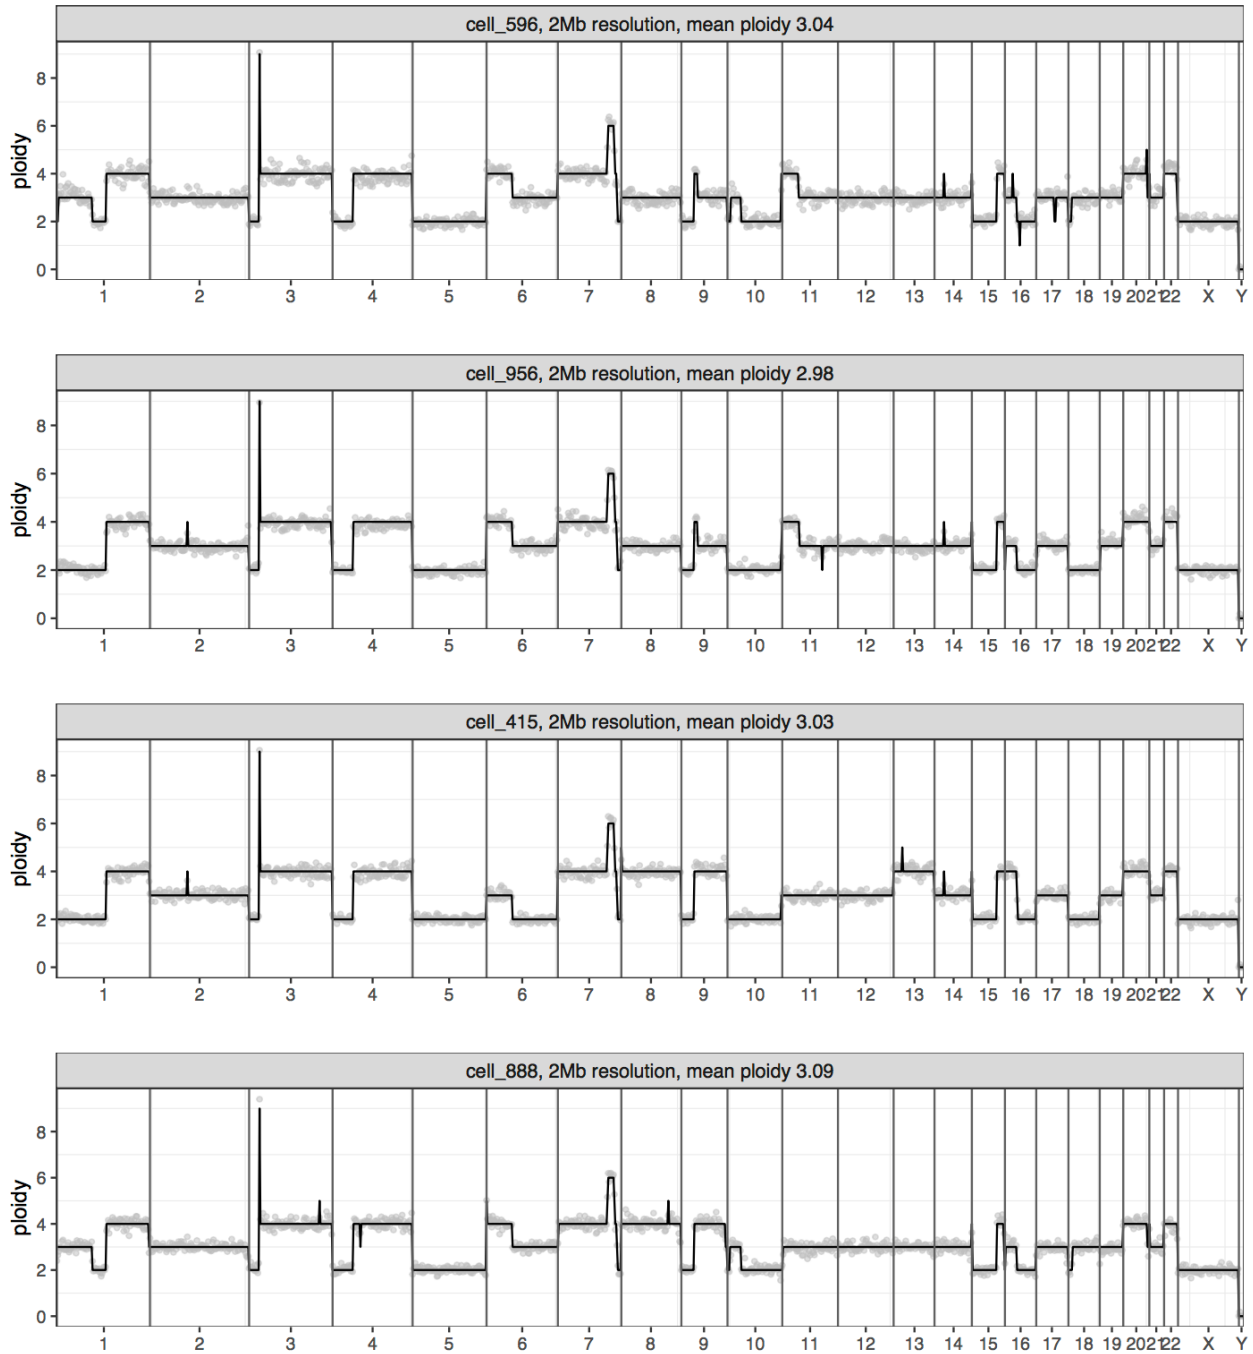

**Supplementary Figure 3 | Four representative single cell ploidy plots.** Copy number profiles plotted at a resolution of 2 Mb bins. Solid black line indicates ploidy call and gray dots indicate raw read counts for each bin.

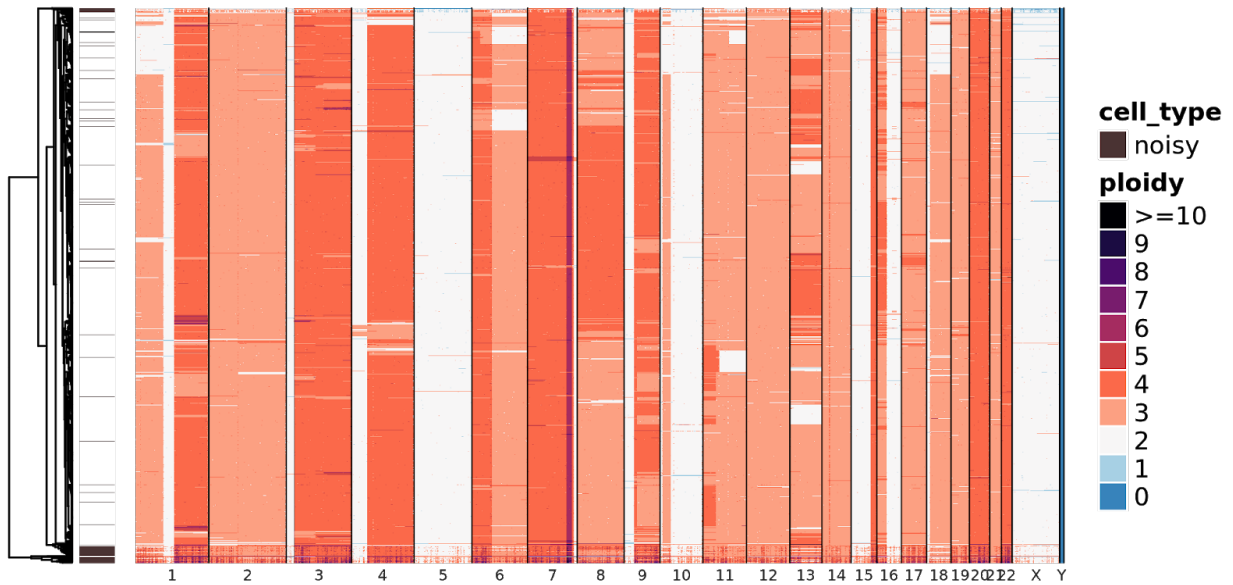

**Supplementary Figure 4 | Heatmap of raw data.** Heatmap showing hierarchical clustering of 1,475 single cell CNV profiles at 2 Mb resolution. Each row depicts the whole genome of a single cell and colors represent the called ploidy as specified by the legend on the right. Color-bar on the right marks single cells labeled by the pipeline as noisy in brown.

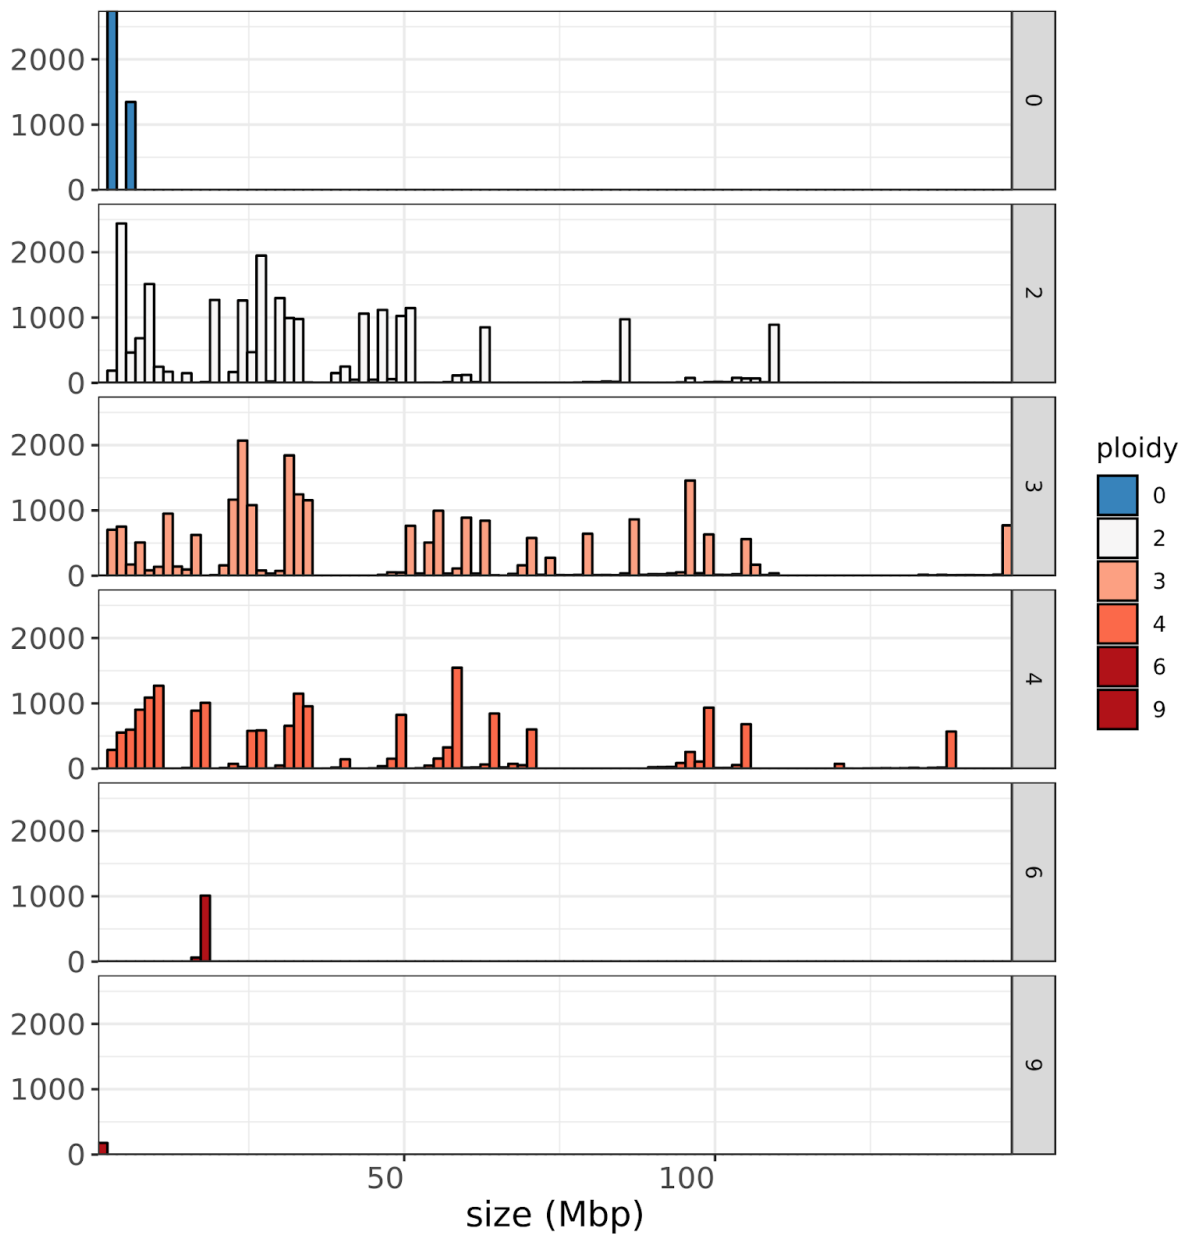

**Supplementary Figure 5 | Size distribution of CNV events by ploidy.** Histogram of the 114 CNV events that passed the following filtering criteria: event quality > 15; event size > 2 Mb and event frequency > 0.05.

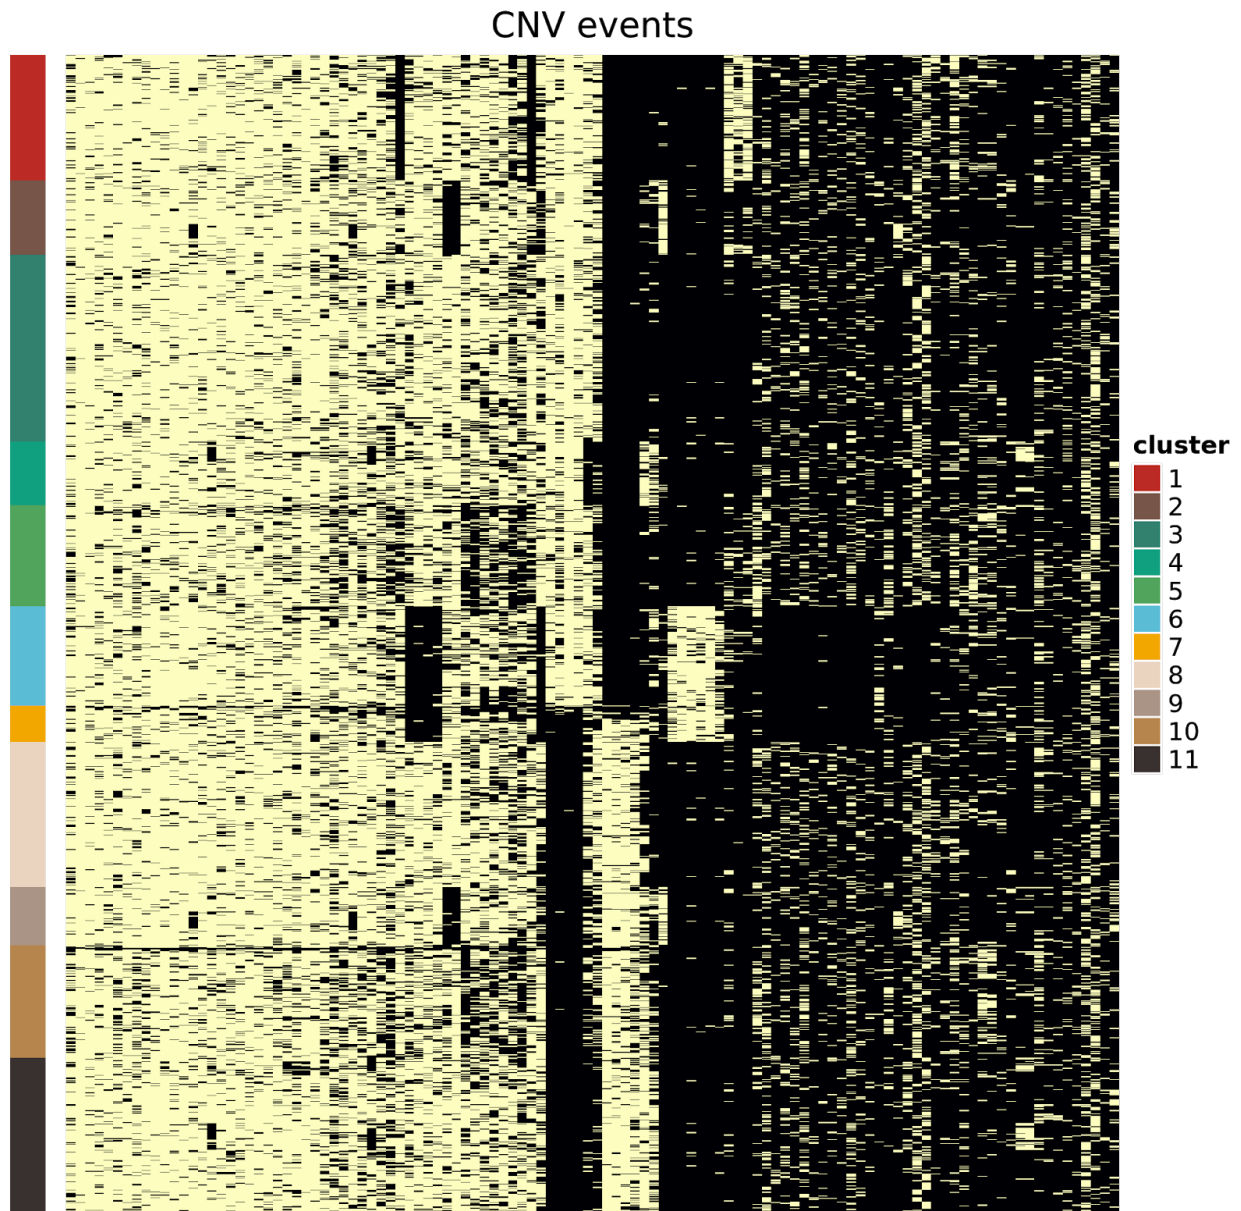

**Supplementary Figure 6 | CNV events within each cluster.** Heatmap with one row for each cell and one column for each of the 122 polymorphic CNV events that passed filtering, ordered by their frequency in the population. The cells are ordered by membership in DAPC clusters. The presence or absence of a mutation is depicted in yellow and black, respectively.

Group A

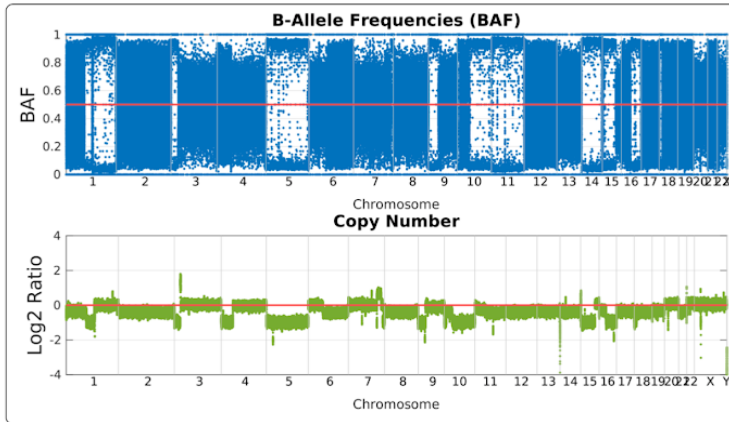

Group B

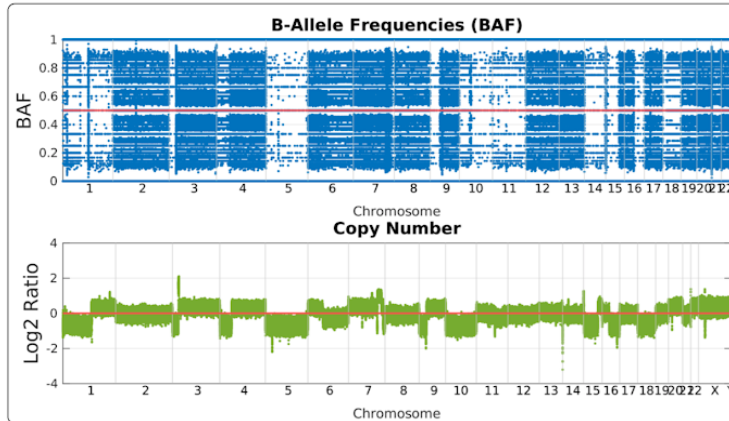

Group C

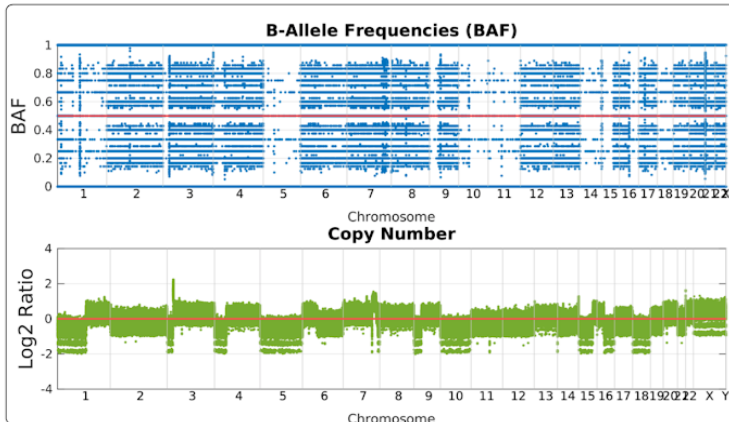

Group D

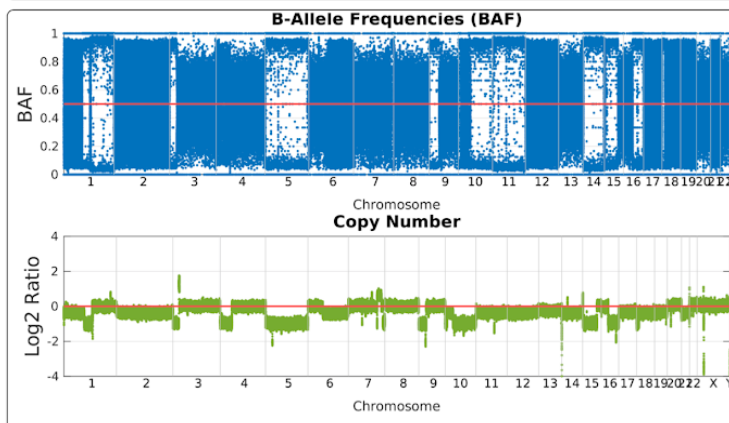

**Supplementary Figure 7 |** Log2(Fold Change) and LOH for each group. The upper graphs show the Log2(Fold Change) using the program tCoNuT, which was used previously for bulk sequencing and produces allele fraction plots. It is important to note that tCoNuT, like other bulk copy number tools cannot determine copy number natively without assumptions for deconvoluting potential mixtures. Single cell copy numbers as used elsewhere do not require this assumption and absolute ploidy can be better inferred. The lower graphs provide the allele fractions of known heterozygous SNPs determined previously from sequencing on the lymphoblastic germline pair. For example in *Group A* at chr5 when copy number is 1, we see allele fractions partitioning into 0 and 1 allele fractions indicating homozygosity. The relative noise is dependent on number of reads over a SNP, and thus greater spread is shown. SNPs across a region or segment could be averaged together to get a regional LOH, value, though individual SNPs are shown in these examples. In the figure above we observe loss of heterozygosity (LOH) for chromosomes 5, 10, 11 and 14. We also see some chromosomes with partial LOH. Within the main figure 4, chromosome 1, 10, and 18 are shown, whereas this figure shows all chromosomes.

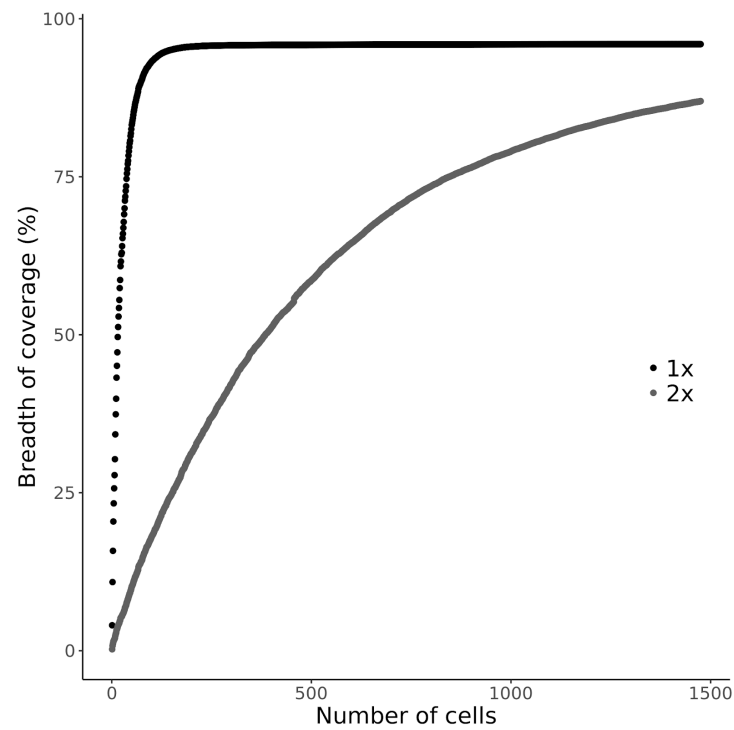

**Supplementary Figure 8 | Cumulative breadth of coverage.** A cumulative plot of genome coverage at two different depths 1x and 2x (black and gray, respectively). Number of cells needed to achieve 75% coverage across the genome is 37 at 1x depth and 845 at 2x depth.

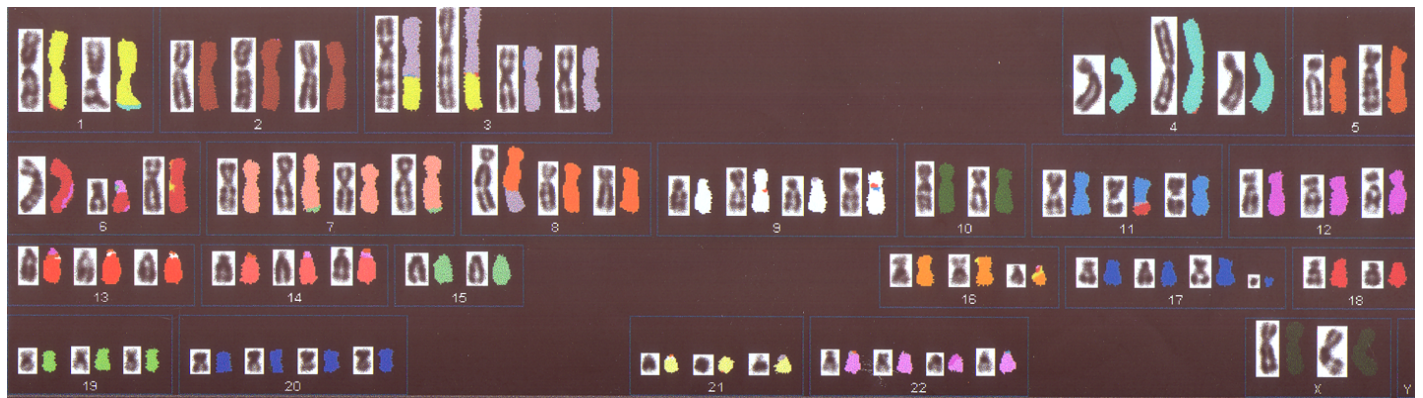

**Supplementary Figure 9 | Spectral Karyotype (SKY) of COLO829 cell-line.** SKY multicolour-FISH Karyotype from 10 metaphases, performed without knowledge of the single cell sequencing and from a separate sample of the cell line, as described<sup>10</sup> but without any confirmation. The karyotype can be regarded as pseudo-tetraploid with losses. It shows clear signs of endoreduplication, several abnormal chromosomes being present in two copies. There is evidence of Dutrillaux's monosomic pattern of karyotype evolution with endoreduplication - e.g. 2 copies each of chromosomes 1, 3 and an unbalanced 1;3 translocation; 2 each of 7, 15 and a probable 7;15 translocation. Consensus karyotype: 69 chromosomes (mode 68) 2 x 1, 2 x 3, 3 x 2, der(?)t(1;3)(q?;p22-24?) x 2, 4 x 2, iso(4), 5 x 2, 6 x 2, del(6) x 2, 7 x 2, der(7)t(7;15?\*) x 2, 8 x 3, 9 x 2, del(9) x 2, 10 x 2, 11 x 3\*\*, 12 x 3, 13 x 3, 14 x 3, 15 x 2, 16 x 2, del(16), 17 x 3, 18 x 2, 19 x 3, 20 x 4, 21 x 3, 22 x 4, X x 2.

\* the fragment is identified by SKY as chromosome 15 but the fragment is very small so this identification is unreliable.

\*\* In 6/10 metaphases there are 3 elevens. In four of these there is an additional unbalanced 1;18 translocation, der(?)t(1p?;18q?), while in the other 4 metaphases one eleven is replaced by a der(?)t(11;18). A possible explanation is that the consensus should include the 1;18 translocation and three elevens, but in some metaphases one eleven and the 1;18 have combined to yield the single der(?)t(11;18).

(A) Chr1p22 -> Chr10p11

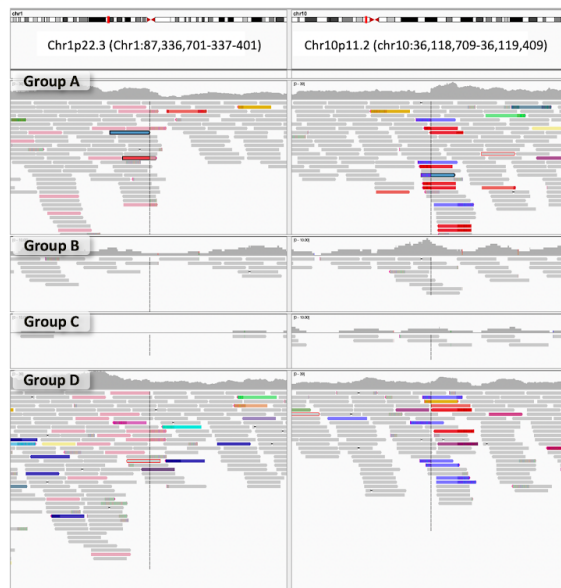

(B) Chr10p14 -> Chr18p11

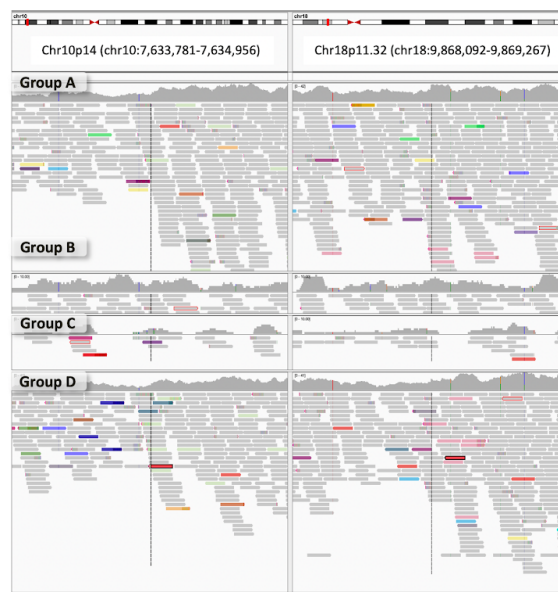

**Supplementary Figure 10 | IGV Traces of anomalous reads spanning translocations.** In left is a split view of Chr1p22 and Chr10p11, showing on the left reads in pink whose partner maps to chr10p11 shown in blue (red reads map 2.7Mb upstream). In the right is a split view of chr10p14 and Chr18p11 where on the partner of light green reads on chromosome 10p11(left) map to Chr18p11.32 (pink reads). Read coloring is formally defined within the IGV manual, and are set to indicate instances where the insert distances between paired reads is beyond 1000bp. Reads mapping within the same chromosome are red, reads mapping to chromosome 18 are in pink, reads mapping to chromosome 10 are blue, reads mapping to chromosome 1 are light green.

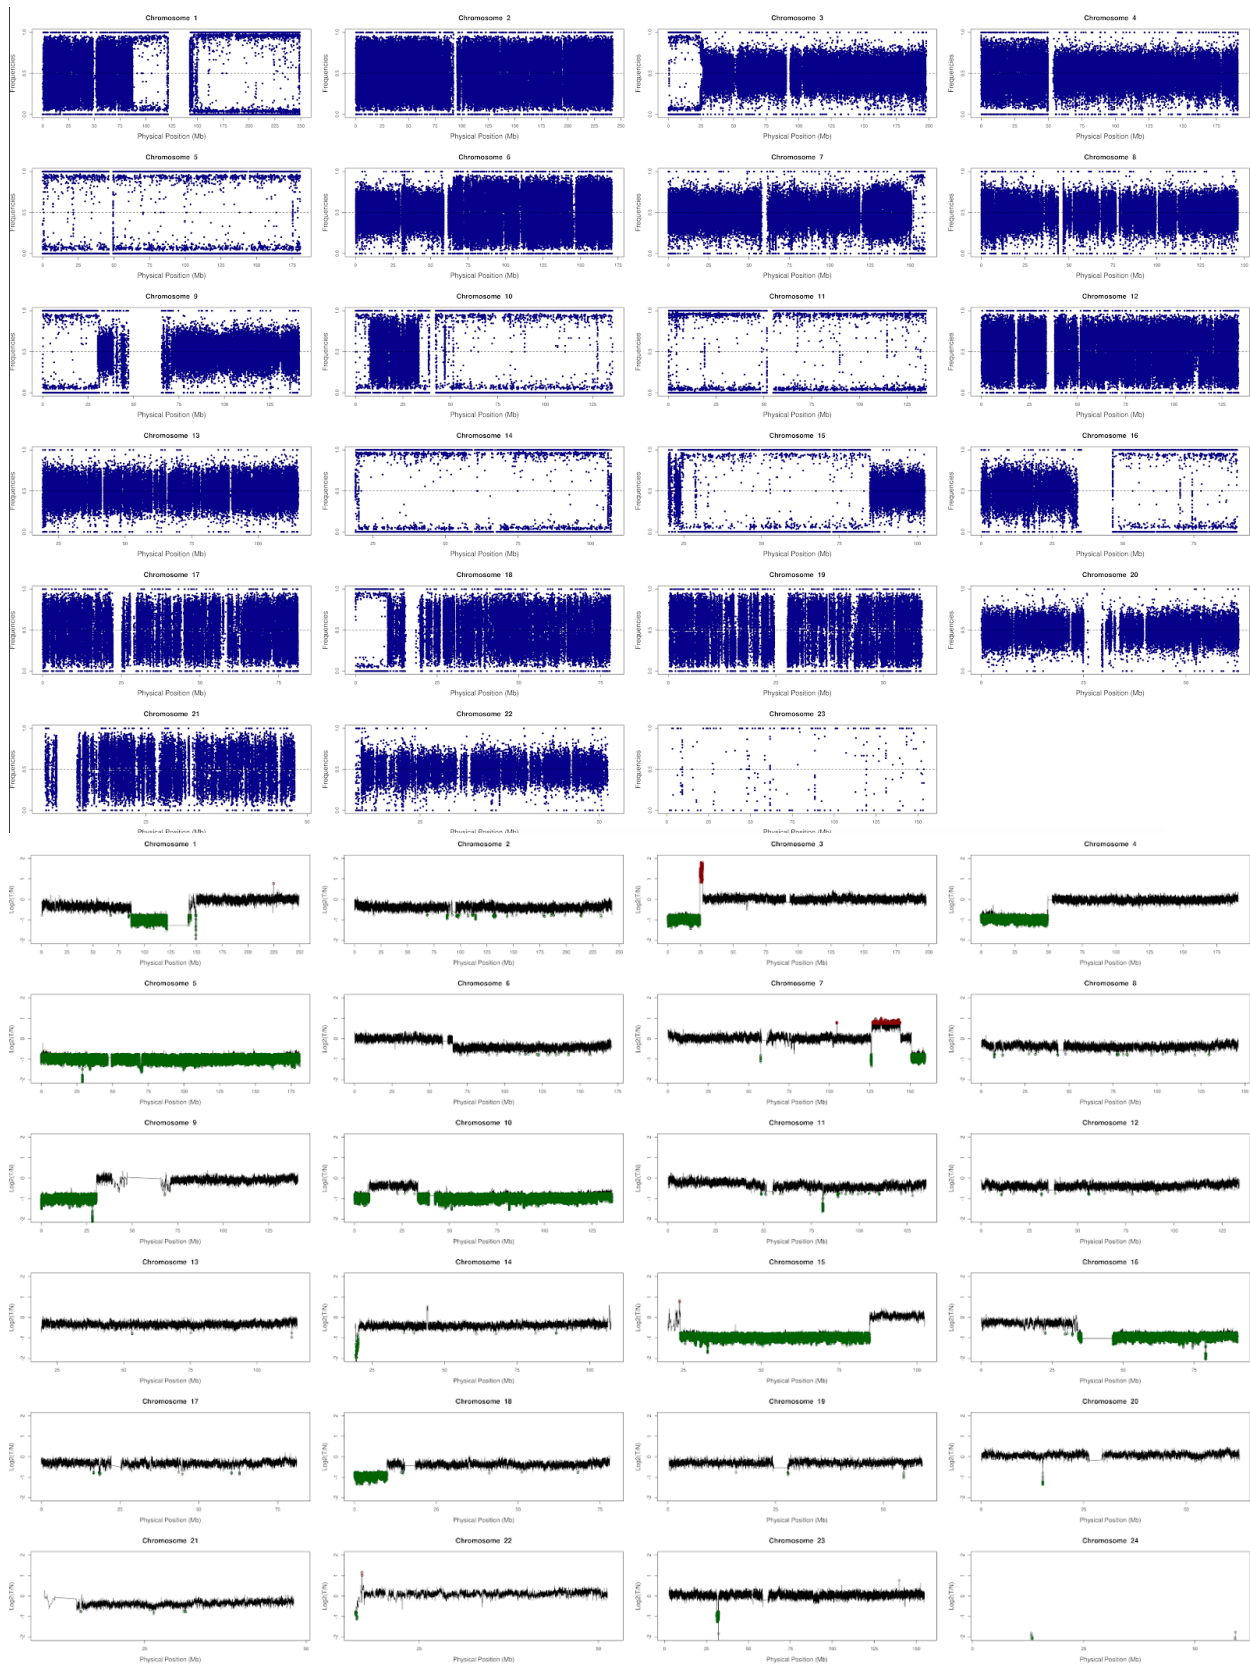

**Supplementary Figure 11 | Exemplary Loss of Heterozygosity (LOH) broken out by chromosome for Group A (upper) and copy number estimate shown by chromosome.**

**Supplementary Table 1 | Aggregate summary metrics.** Summary metrics describing sequencing data quality by group.

| Groups   | Number of cells | Number of reads | Number of effective reads | Average ploidy | Median reads per Mb |
|----------|-----------------|-----------------|---------------------------|----------------|---------------------|
| <b>A</b> | 653             | 1,106,320,742   | 866,039,383               | 3.03           | 428                 |
| <b>B</b> | 117             | 195,118,990     | 152,584,425               | 2.95           | 416                 |
| <b>C</b> | 43              | 78,145,878      | 60,875,291                | 3.01           | 450                 |
| <b>D</b> | 560             | 975,448,264     | 763,375,990               | 3.11           | 435                 |

Supplementary Table 2 | Per cell summary metrics. Per cell metrics describing sequencing and CNV estimation data quality.

| barcode            | total_num_reads | num_unmapped_reads | num_duplicate_reads | num_lowmap_reads | num_mapped_dedup_reads | effective_reads_per_1Mbp | effective_depth_of_coverage | breadth_of_coverage_percent | mean_gloidy | raw_mapd      | normalized_mapd | is_noisy |
|--------------------|-----------------|--------------------|---------------------|------------------|------------------------|--------------------------|-----------------------------|-----------------------------|-------------|---------------|-----------------|----------|
| AAACCTGAGCGTCGA-1  | 1474382         | 14559              | 162572              | 126544           | 1367707                | 377                      | 0.034061409                 | 3.58342533                  | 3.024427338 | 0.097364283   | 0.095897271     | 0        |
| AAACCTGGCTCTGGG-1  | 2008984         | 34666              | 217429              | 183078           | 1573811                | 508                      | 0.045954133                 | 4.795426567                 | 3.115261147 | 0.085370623   | 0.085370623     | 0        |
| AAACCTGTGACAGCG-1  | 1317000         | 74665              | 138878              | 112449           | 995008                 | 320                      | 0.028780153                 | 3.0242607                   | 3.087988182 | 0.105997248   | 0.104502012     | 0        |
| AAACCTGTCTGATAC-1  | 2317026         | 39811              | 253774              | 1816479          | 206942                 | 587                      | 0.052921028                 | 5.473836533                 | 3.141717404 | 0.084737444   | 0.081279279     | 0        |
| AAACGGGAGGATGCT-1  | 1339444         | 63506              | 140596              | 118291           | 1017051                | 329                      | 0.029609209                 | 3.125955133                 | 3.007986648 | 0.101450204   | 0.100216564     | 0        |
| AAACGGGAAAGTAAC-1  | 1477800         | 26950              | 159618              | 138195           | 1153037                | 372                      | 0.031729644                 | 3.5298465                   | 2.995454545 | 0.100199795   | 0.101997012     | 0        |
| AAACGGGCACTCAAA-1  | 1955138         | 22541              | 172915              | 1256142          | 13540                  | 406                      | 0.036628118                 | 3.840771333                 | 3.093311835 | 0.094287391   | 0.094494211     | 0        |
| AAACGGGGCTCTGTC-1  | 1421664         | 29372              | 155391              | 126737           | 1110164                | 359                      | 0.032357084                 | 3.406371133                 | 3.097976261 | 0.099142644   | 0.100191291     | 0        |
| AAACGGGTCACTCT-1   | 1947700         | 69453              | 203082              | 170985           | 1504180                | 486                      | 0.043601468                 | 4.5173273                   | 3.110392748 | 0.095612311   | 0.095115229     | 0        |
| AAACGGGTACGGCT-1   | 1874782         | 77070              | 194127              | 167465           | 1436120                | 464                      | 0.041812765                 | 4.379485167                 | 3.104900385 | 0.088254406   | 0.088273856     | 0        |
| AAAGATGAAGATTGT-1  | 1360902         | 18396              | 148620              | 110941           | 1081945                | 350                      | 0.031547124                 | 3.319917967                 | 3.029837493 | 0.102167485   | 0.098182972     | 0        |
| AAAGATGAGCGTGT-1   | 1401994         | 37826              | 151902              | 114344           | 1097922                | 355                      | 0.031966123                 | 3.362355867                 | 3.295852273 | 0.126780578   | 0.124095547     | 1        |
| AAAGAGTGAACAGA-1   | 1627784         | 21922              | 177338              | 143815           | 1286709                | 416                      | 0.037320406                 | 3.930806                    | 2.99614311  | 0.093248267   | 0.091966727     | 0        |
| AAAGAACTCGGACT-1   | 2535646         | 66346              | 270589              | 221324           | 1977387                | 639                      | 0.057652785                 | 5.9424639                   | 2.924726828 | 0.081466752   | 0.080154264     | 0        |
| AAAGAACTCACTGT-1   | 1362442         | 14465              | 1056162             | 118633           | 1056162                | 341                      | 0.030766899                 | 3.2326992                   | 3.016306123 | 0.097433428   | 0.097433428     | 0        |
| AAAGATGTCAGCGG-1   | 1588694         | 72155              | 164063              | 139314           | 1213162                | 392                      | 0.03534518                  | 3.717024933                 | 3.071467129 | 0.096109255   | 0.094734635     | 0        |
| AAACGGTCTCGGAA-1   | 1743832         | 21599              | 190415              | 151355           | 1380283                | 446                      | 0.040302052                 | 4.212429                    | 3.109763721 | 0.09368707    | 0.092047768     | 0        |
| AAATGCCAGTGGAGAA-1 | 1887248         | 24398              | 208852              | 159160           | 1496838                | 484                      | 0.043653634                 | 4.5483168                   | 3.217591145 | 0.091792681   | 0.087716553     | 0        |
| AAATGCCCTCGGCTA-1  | 1270188         | 34801              | 116846              | 990920           | 116846                 | 320                      | 0.0288885                   | 3.060221167                 | 3.096371218 | 0.102880182   | 0.105037849     | 0        |
| AACACATGAGAGAGAA-1 | 1715466         | 26131              | 187931              | 136027           | 1145367                | 439                      | 0.039683152                 | 4.1453637                   | 3.039962489 | 0.090117962   | 0.088405146     | 0        |
| AACATGATGAATGCT-1  | 1755616         | 29575              | 184714              | 160668           | 1380359                | 446                      | 0.040288294                 | 4.222308                    | 2.9406127   | 0.090392407   | 0.090221475     | 0        |
| AACCATGAGGATCT-1   | 2232400         | 56542              | 240451              | 200646           | 1734761                | 560                      | 0.05028511                  | 5.1617407                   | 3.022067702 | 0.090892961   | 0.090312027     | 1        |
| AACCATGATTAATCT-1  | 2499372         | 69982              | 226612              | 1938614          | 1938614                | 626                      | 0.056290364                 | 5.774783533                 | 3.144110356 | 0.08363078    | 0.084799031     | 0        |
| AACCATGTCAGGAA-1   | 1875222         | 33941              | 202787              | 159999           | 1478495                | 478                      | 0.041463902                 | 4.502720333                 | 3.072046662 | 0.087085148   | 0.088366009     | 0        |
| AACCGGTCAGACG-1    | 1166466         | 49495              | 120434              | 102263           | 895274                 | 289                      | 0.020306977                 | 2.760984133                 | 3.05006237  | 0.111992158   | 0.108989662     | 0        |
| AACCGCGTTTACT-1    | 1988752         | 62880              | 205591              | 184180           | 1536301                | 496                      | 0.044735569                 | 4.655430567                 | 3.047020005 | 0.088926553   | 0.088679451     | 0        |
| AACCGGCTCTACGAA-1  | 563392          | 7733               | 53940               | 48652            | 453067                 | 146                      | 0.0313859                   | 4.131549933                 | 3.029306986 | 0.154193939   | 0.147379952     | 0        |
| AACGTGTGGTGAACG-1  | 1827248         | 62088              | 191353              | 1416690          | 157117                 | 458                      | 0.04128055                  | 3.039010684                 | 3.039010684 | 0.09630223    | 0.093155669     | 0        |
| AACATGATGGGTGAC-1  | 2821904         | 73049              | 302336              | 250316           | 2187303                | 710                      | 0.063968984                 | 6.547377067                 | 2.900969998 | 0.078979288   | 0.078016643     | 0        |
| AACATGAGGTGAGC-1   | 2247774         | 30306              | 243754              | 206857           | 1766857                | 571                      | 0.051485642                 | 5.318281967                 | 3.037099937 | 0.082456861   | 0.08163954      | 0        |
| AACATGAGTGAAGTT-1  | 1867088         | 14187              | 108811              | 151233           | 1490757                | 482                      | 0.044546005                 | 4.5154008                   | 3.11380768  | 0.088863668   | 0.087189797     | 0        |
| AACATGATGAGTATC-1  | 3006250         | 21408              | 332188              | 260471           | 2392183                | 773                      | 0.068616244                 | 7.090951033                 | 2.924756626 | 0.076415497   | 0.075939943     | 0        |
| AACTGTGTAAACAG-1   | 1403838         | 90210              | 145694              | 121478           | 1046436                | 338                      | 0.034043965                 | 3.2138271                   | 3.095987898 | 0.1051481     | 0.102782668     | 0        |
| AACTCTCTCAGTTCT-1  | 2126942         | 49183              | 229009              | 191517           | 1657553                | 535                      | 0.048225871                 | 5.007724567                 | 3.134622898 | 0.088129786   | 0.087240166     | 0        |
| AACTCTCTCAGGATA-1  | 1534634         | 15986              | 170798              | 126146           | 1221684                | 395                      | 0.035606949                 | 3.7311491                   | 3.026584373 | 0.095971137   | 0.095608002     | 0        |
| AACTCTCTCAGTAGG-1  | 1475146         | 15241              | 162822              | 121556           | 1175527                | 380                      | 0.034151791                 | 3.600771433                 | 2.985248205 | 0.097488988   | 0.096216596     | 0        |
| AACTCTCTTAATGCG-1  | 2693360         | 65471              | 293267              | 232267           | 2105301                | 680                      | 0.06330555                  | 6.2800228                   | 3.167214862 | 0.079541131   | 0.079541131     | 0        |
| AACTCTAGAGTAGCC-1  | 2286696         | 49254              | 244128              | 204061           | 1789253                | 578                      | 0.052149528                 | 5.4014467                   | 3.011585535 | 0.088088396   | 0.088574925     | 0        |
| AACTCTGTCTACCC-1   | 1792152         | 54661              | 191208              | 159484           | 1387159                | 448                      | 0.04045578                  | 3.046055576                 | 0.091433925 | 0.089299318   | 0.089299318     | 0        |
| AACTCTTCTCGGTT-1   | 1948040         | 19303              | 214334              | 176285           | 1538118                | 497                      | 0.044868642                 | 4.62585433                  | 3.105571181 | 0.086000033   | 0.086000033     | 1        |
| AACTGTGAGAAACAT-1  | 6440042         | 48827              | 730054              | 580919           | 5100132                | 1648                     | 0.148897051                 | 14.4383907                  | 3.081798283 | 0.050557647   | 0.050557647     | 0        |
| AACTGGTAGTCAACG-1  | 1725966         | 92510              | 179530              | 150747           | 1303379                | 421                      | 0.037917509                 | 3.983259223                 | 3.143699347 | 0.093702469   | 0.093335474     | 0        |
| AACTGGAGGGGCGTA-1  | 1855552         | 20621              | 202050              | 158042           | 1475839                | 477                      | 0.040921667                 | 4.488303143                 | 3.035765033 | 0.098645377   | 0.089243381     | 0        |
| AACTGTGTGTGGAAG-1  | 2255874         | 27883              | 123899              | 999883           | 104209                 | 323                      | 0.075018644                 | 3.086339776                 | 3.086339776 | 0.102153256   | 0.102153256     | 0        |
| AACTGGTGTCTAGTAC-1 | 2249426         | 50915              | 244846              | 197894           | 1755771                | 567                      | 0.050985723                 | 5.247257533                 | 3.006791654 | 0.080135328   | 0.080135328     | 0        |
| AACTGGTGTGACCG-1   | 980516          | 13896              | 90446               | 80860            | 670514                 | 217                      | 0.031947477                 | 2.075725667                 | 3.05446135  | 0.120807581   | 0.124841242     | 0        |
| AACTTCTGAGTAGGA-1  | 3671884         | 18896              | 151288              | 1084605          | 1127995                | 350                      | 0.034064757                 | 3.325611067                 | 3.057825231 | 0.101656719   | 0.092947465     | 0        |
| AACTTCTTCTGGA-1    | 1688648         | 22641              | 186709              | 151057           | 1328241                | 429                      | 0.038749421                 | 4.0454271                   | 3.091688631 | 0.090553483   | 0.088523146     | 0        |
| AAGACTCTCAAGGAG-1  | 774862          | 40377              | 77882               | 542862           | 71791                  | 188                      | 0.017061097                 | 1.828308833                 | 3.010372811 | 0.139719946   | 0.13524537      | 0        |
| AAGACCTCACGATGC-1  | 1547280         | 122948             | 155960              | 131134           | 1137238                | 367                      | 0.032934267                 | 3.4613962                   | 3.072078426 | 0.098307929   | 0.097219793     | 0        |
| AAGACTCTCCCTCA-1   | 2081424         | 27512              | 225963              | 175333           | 1652616                | 534                      | 0.040220729                 | 4.991967                    | 3.308575897 | 0.121725674   | 0.119367301     | 1        |
| AAGACTCACTTGAGT-1  | 1968878         | 19080              | 216679              | 1567077          | 166042                 | 506                      | 0.045742309                 | 4.751080303                 | 3.08331972  | 0.086767176   | 0.085854819     | 0        |
| AAGACTCTATGACACT-1 | 2356728         | 60362              | 252951              | 210185           | 1834230                | 593                      | 0.053478813                 | 5.52696558                  | 3.072539355 | 0.084303481   | 0.083832883     | 0        |
| AAGACTGTGACGCTA-1  | 1279504         | 15331              | 139501              | 106601           | 1011571                | 327                      | 0.029516765                 | 3.1151629                   | 3.140806659 | 0.105485391   | 0.102580799     | 0        |
| AAGACTCTACGATAT-1  | 2233960         | 17432              | 181187              | 1787158          | 1364139                | 577                      | 0.05012545                  | 3.068237517                 | 3.068237517 | 0.083376316   | 0.080627504     | 0        |
| AAGACTTCTCGAGATT-1 | 1166124         | 26317              | 127734              | 94854            | 915199                 | 296                      | 0.026713777                 | 2.816703167                 | 3.018662254 | 0.109037178   | 0.105103862     | 0        |
| AAGCGCTCATCTACC-1  | 2708982         | 74197              | 285899              | 237985           | 2110001                | 682                      | 0.063153954                 | 3.043286071                 | 0.080022708 | 0.0791901761  | 0.0791901761    | 0        |
| AAGGACGCAAGATCA-1  | 1116436         | 41741              | 116288              | 100776           | 857631                 | 277                      | 0.025076927                 | 2.661535433                 | 3.018511549 | 0.111501177   | 0.113028341     | 0        |
| AAGGACGAGAGCCAA-1  | 2335452         | 14835              | 255573              | 210527           | 1854517                | 599                      | 0.054147331                 | 5.599737033                 | 3.072701689 | 0.080106992   | 0.081262992     | 0        |
| AAGGACGTAAGATCA-1  | 3499226         | 194178             | 310763              | 2620613          | 2620613                | 841                      | 0.057704884                 | 3.047464443                 | 0.06870368  | 0.067680204   | 0.067680204     | 0        |
| AAGGTCAAGCTGTGA-1  | 1431840         | 19756              | 150647              | 121448           | 1139899                | 368                      | 0.033251916                 | 3.450283867                 | 2.929760066 | 0.102286359   | 0.095609529     | 0        |
| AAGGTTCAGATTGTC-1  | 2080386         | 47893              | 225218              | 179731           | 1628044                | 526                      | 0.047346772                 | 4.9170601                   | 3.014077401 | 0.086751793   | 0.085454525     | 0        |
| AAGGTCTCTCGAATT-1  | 1783462         | 42806              | 187132              | 1385461          | 14205467               | 446                      | 0.040378782                 | 2.978691214                 | 0.093311446 | 0.092194392   | 0.092194392     | 0        |
| AAGGTCTGTATATGA-1  | 874982          | 20862              | 91887               | 73200            | 689033                 | 223                      | 0.020055948                 | 2.113062257                 | 3.084092571 | 0.123041112   | 0.122001727     | 0        |
| AAGGTCTGTAGGAG-1   | 1748494         | 56248              | 152527              | 1355922          | 1355922                | 438                      | 0.039574736                 | 4.143663467                 | 3.034990164 | 0.091991493   | 0.090799195     | 0        |
| AAGGTCTGTTGCTCT-1  | 2575348         | 38730              | 278017              | 214739           | 2043842                | 660                      | 0.05953717                  | 6.102545167                 | 3.152302078 | 0.132374251   | 0.132374251     | 1        |
| AAGGTCTCGCGACA-1   | 2134632         | 69346              | 223136              | 187515           | 1654635                | 534                      | 0.048231319                 | 5.034670833                 | 2.952552774 | 0.086390371   | 0.086390371     | 0        |
| AAGTCTGAGGCCGTT-1  | 1663256         | 18056              | 181469              | 140776           | 1322345                | 427                      | 0.038595661                 | 4.025418733                 | 3.108119625 | 0.093725987   | 0.093797908     | 0        |
| AAGTCTGAGTGGATG-1  | 1705082         | 23876              | 188048              | 133689           | 1363469                | 440                      | 0.039843722                 | 4.152287333                 | 2.989965057 | 0.090676158   | 0.090575468     | 0        |
| AAGTCTGTCAACGCA-1  | 1405766         | 16157              | 149493              | 131967           | 1108149                | 358                      | 0.032791599                 | 3.415382333                 | 3.002989951 | 0.100584012   | 0.100109823     | 0        |
| AATCGAGGTTGAGAA-1  | 1472704         | 24058              | 162103              | 129085           | 1157458                | 374                      | 0.031388803                 | 3.5431511                   | 3.048945735 | 0.093381783   | 0.093381783     | 0        |
| AATCGATGACTGCG-1   | 1501682         | 101547             | 153596              | 132549           | 1113990                | 360                      | 0.03409317                  | 3.4715784                   | 2.981799841 | 0.101928189   | 0.100844939     | 0        |
| AATCGATGAGAGGTA-1  | 1778968         | 20720              | 187638              | 148910           | 1385700                | 448                      | 0.040410101                 | 4.222183                    | 3.084431219 | 0.097108865</ |                 |          |

|                     |         |        |        |         |           |     |             |             |             |             |             |   |
|---------------------|---------|--------|--------|---------|-----------|-----|-------------|-------------|-------------|-------------|-------------|---|
| ACAGCCGTTTGCGC-1    | 1300972 | 20708  | 138945 | 120680  | 1020799   | 330 | 0.029695062 | 3.144617367 | 3.056788848 | 0.105839368 | 0.105839368 | 0 |
| ACAGCTAAGACTCGA-1   | 2329338 | 36147  | 235300 | 186817  | 1853374   | 598 | 0.05192884  | 5.561354867 | 3.730724366 | 0.142051914 | 0.142033883 | 1 |
| ACAGCTAAGACTACT-1   | 2054712 | 25559  | 190268 | 1611359 | 48795573  | 521 | 0.046946572 | 4.8795573   | 3.072039558 | 0.084071237 | 0.085329516 | 1 |
| ACAGCTACAGACAG-1    | 1390540 | 25218  | 147780 | 142095  | 1075447   | 347 | 0.031320565 | 3.270889167 | 3.046268073 | 0.123598383 | 0.106551431 | 0 |
| ACAGCTATCGGAAGC-1   | 2047728 | 67040  | 219315 | 181967  | 1579596   | 510 | 0.045993917 | 4.788215233 | 3.038065524 | 0.086802222 | 0.086345479 | 0 |
| ACATATGAGCCGAACA-1  | 1933334 | 82909  | 172557 | 1475719 | 4775      | 477 | 0.042939418 | 4.4796397   | 3.039761022 | 0.09051637  | 0.087489465 | 0 |
| ACATATGAGGTAAAGC-1  | 2155174 | 38268  | 230722 | 193333  | 1692851   | 547 | 0.048287004 | 5.131931267 | 3.046721736 | 0.085187769 | 0.085468485 | 0 |
| ACATATGAGTTAGGGC-1  | 1843254 | 159734 | 159734 | 1430837 | 145734    | 462 | 0.041692929 | 4.3516068   | 3.108740278 | 0.089288608 | 0.087070242 | 0 |
| ACATACGACTCCGAG-1   | 1852388 | 56773  | 197785 | 154936  | 1443404   | 466 | 0.042020874 | 4.3849305   | 3.037744025 | 0.092099546 | 0.087989202 | 0 |
| ACATACGGTATATGT-1   | 1216200 | 16186  | 131761 | 97258   | 970995    | 314 | 0.028131585 | 2.986117567 | 3.141729879 | 0.108049973 | 0.106239597 | 0 |
| ACATACGGTCTCTGCT-1  | 1947230 | 17401  | 180122 | 1542246 | 46810789  | 498 | 0.045008917 | 4.66086422  | 2.964006422 | 0.080716768 | 0.085540393 | 0 |
| ACATAGAGTGTACGG-1   | 1548242 | 30265  | 165430 | 138008  | 1214539   | 392 | 0.035438602 | 3.729571833 | 3.141483965 | 0.094647312 | 0.093557268 | 0 |
| ACATAGAGTTAGGGC-1   | 2162160 | 68128  | 230826 | 180211  | 1677365   | 542 | 0.048843542 | 5.0707868   | 3.044951595 | 0.085319287 | 0.083151294 | 0 |
| ACATGTTGTCAGACC-1   | 2342724 | 42177  | 230391 | 1841915 | 5595      | 555 | 0.053685334 | 5.5509565   | 3.094818583 | 0.079690392 | 0.080236603 | 0 |
| ACAGCTAAGACTTACC-1  | 1976404 | 34859  | 211875 | 189856  | 1540014   | 497 | 0.04195541  | 4.6606386   | 2.915582109 | 0.09155485  | 0.085235766 | 0 |
| ACAGTATGTTTACGT-1   | 1900212 | 14913  | 20610  | 164185  | 488       | 488 | 0.044757688 | 4.5836624   | 3.037613148 | 0.082385431 | 0.083474961 | 0 |
| ACCAATGATCTCGAA-1   | 1147368 | 17087  | 189798 | 157215  | 1383268   | 447 | 0.040387415 | 4.213793267 | 3.130242669 | 0.089748891 | 0.088434455 | 0 |
| ACCCACTAGTATCTCG-1  | 1888022 | 13922  | 202901 | 173865  | 1478334   | 478 | 0.041006009 | 4.489405723 | 3.047354849 | 0.090481628 | 0.087961445 | 0 |
| ACCCACTGAGGGTGT-1   | 2158200 | 14179  | 202790 | 210811  | 2027990   | 655 | 0.0591447   | 6.0762124   | 3.080819868 | 0.079529912 | 0.079520858 | 0 |
| ACGCTAACAGTACGA-1   | 1380940 | 13625  | 148441 | 116163  | 1102711   | 356 | 0.032154616 | 3.387403167 | 3.012291852 | 0.100655279 | 0.099934378 | 0 |
| ACCGTAACTCTGCT-1    | 1371276 | 27029  | 145865 | 119787  | 1078595   | 248 | 0.031406954 | 3.312204123 | 3.047964476 | 0.101412741 | 0.101846251 | 0 |
| ACCTTAAGTGCGGCTA-1  | 1984054 | 31521  | 215983 | 173725  | 1562825   | 505 | 0.045635576 | 4.752964833 | 3.073153056 | 0.087336541 | 0.087971547 | 0 |
| ACGAGCGCTGCGCTTG-1  | 480602  | 16054  | 50702  | 39264   | 374582    | 121 | 0.010972491 | 1.1839396   | 3.006909039 | 0.165813859 | 0.166136113 | 0 |
| ACGAGGACACCGCAT-1   | 2202826 | 39079  | 235824 | 196065  | 1729318   | 559 | 0.050400606 | 5.1903268   | 2.949807498 | 0.082234569 | 0.081124728 | 0 |
| ACGAGGACATAGGGT-1   | 1970072 | 20694  | 211295 | 168772  | 1569311   | 507 | 0.045824131 | 4.755402733 | 2.903216673 | 0.086821051 | 0.088564303 | 0 |
| ACGAGGACATCTGAA-1   | 1589852 | 13520  | 175320 | 138171  | 1262841   | 408 | 0.036813441 | 3.86119204  | 2.963469995 | 0.077026897 | 0.090469089 | 0 |
| ACGAGTACGAAGATTCT-1 | 2405464 | 45266  | 258237 | 206864  | 1895097   | 612 | 0.05121206  | 5.684148267 | 3.034979292 | 0.084124204 | 0.083113122 | 0 |
| ACGATACACGCAAAG-1   | 1565708 | 43644  | 173027 | 130158  | 1221699   | 395 | 0.035579155 | 3.730359167 | 3.065921274 | 0.096255677 | 0.097437977 | 0 |
| ACGATACAGTCTCCTT-1  | 2182200 | 51047  | 233881 | 196106  | 1701366   | 550 | 0.049620587 | 5.136295223 | 3.120066095 | 0.089321356 | 0.083654971 | 0 |
| ACGATATCTGAGGTGA-1  | 2134112 | 23242  | 233072 | 1696908 | 180790    | 548 | 0.049549346 | 5.133871267 | 3.095033425 | 0.085033719 | 0.082370477 | 0 |
| ACGATGTACATGGG-1    | 1533672 | 18629  | 167922 | 128048  | 1229073   | 394 | 0.038624279 | 3.727744667 | 3.072894475 | 0.093725177 | 0.095030389 | 0 |
| ACGATGTGTATACCA-1   | 1729378 | 53666  | 184144 | 144803  | 1347765   | 435 | 0.039166738 | 4.0891198   | 3.036356662 | 0.089697559 | 0.096215483 | 0 |
| ACGATGTCTTGATAT-1   | 2345280 | 27813  | 348751 | 280877  | 2666849   | 861 | 0.077807053 | 7.906088167 | 3.078657534 | 0.07609091  | 0.07609091  | 0 |
| ACGCGAGCTACGGCC-1   | 1792344 | 57475  | 189668 | 168114  | 1380787   | 466 | 0.040184418 | 4.205522933 | 2.971514243 | 0.090480299 | 0.088751421 | 0 |
| ACGCGAGCTCGCTCTA-1  | 2087834 | 29942  | 244002 | 1648064 | 1482167   | 532 | 0.048021425 | 4.992167267 | 3.108778846 | 0.086242302 | 0.086101237 | 0 |
| ACGCGAGCAGAGAGA-1   | 1496968 | 24486  | 159756 | 127188  | 1183538   | 382 | 0.034569834 | 3.6316096   | 3.066274643 | 0.099224777 | 0.096272719 | 0 |
| ACGCGAGAGGGTGT-1    | 2271446 | 17733  | 244522 | 201180  | 1830811   | 584 | 0.052738271 | 5.446306333 | 2.874769528 | 0.084700755 | 0.085000719 | 0 |
| ACGCGAGACAGCTGCT-1  | 1625818 | 24915  | 146652 | 1279024 | 146652    | 413 | 0.037190945 | 3.894130367 | 2.405532311 | 0.093930142 | 0.095435505 | 0 |
| ACGCGAGTACCACTAT-1  | 2425936 | 23263  | 262979 | 212328  | 1927396   | 623 | 0.056289291 | 5.790497837 | 3.031712879 | 0.081790805 | 0.079392069 | 0 |
| ACGCGAGTCTCGGAAT-1  | 2524986 | 35640  | 220915 | 1997562 | 1597562   | 645 | 0.058245061 | 5.999051767 | 3.10649454  | 0.082614331 | 0.079362381 | 0 |
| ACGCGAGACAGAGCC-1   | 2059308 | 82015  | 213546 | 184685  | 1578962   | 510 | 0.045938662 | 4.777867532 | 3.052397528 | 0.085790207 | 0.087685127 | 0 |
| ACGCGAGAGAGGCTCT-1  | 1879398 | 33050  | 194090 | 171141  | 1481117   | 478 | 0.041161277 | 4.507858033 | 3.03377188  | 0.085986667 | 0.086625096 | 0 |
| ACGCGAGACAGAGCC-1   | 1274780 | 29996  | 133322 | 996102  | 133322    | 322 | 0.028963708 | 3.064372933 | 3.031834421 | 0.104529993 | 0.103030621 | 0 |
| ACGCGAGAGCGCTAAT-1  | 1510314 | 12919  | 167795 | 118186  | 1211394   | 391 | 0.035365851 | 3.697122133 | 3.044725235 | 0.102422677 | 0.102156791 | 1 |
| ACGCGAGAGCGGAACA-1  | 1870200 | 59658  | 208760 | 165518  | 1444264   | 467 | 0.04211348  | 4.395874267 | 3.060841769 | 0.092934158 | 0.090285877 | 0 |
| ACGCGAGAGGTCAGCC-1  | 1687642 | 66288  | 176812 | 1289527 | 1590515   | 417 | 0.037574239 | 3.9443703   | 3.092616925 | 0.096416639 | 0.096416639 | 0 |
| ACGCGAGATCGATCCG-1  | 1698712 | 36263  | 180595 | 153861  | 1327993   | 429 | 0.038666782 | 4.045006267 | 3.090801242 | 0.093251565 | 0.092367631 | 0 |
| ACGGCCAAAGAGGTTT-1  | 2095810 | 58802  | 256330 | 170479  | 1640905   | 530 | 0.047833024 | 4.944299767 | 3.131815501 | 0.106290561 | 0.106290561 | 1 |
| ACGGCCAAAGATGTGT-1  | 2217226 | 15820  | 251549 | 195441  | 1854286   | 599 | 0.054170794 | 5.560749023 | 3.16002307  | 0.081579968 | 0.080154444 | 0 |
| ACGGCCAAAGAGAAAT-1  | 1818180 | 29968  | 197937 | 153539  | 1436736   | 464 | 0.04107997  | 4.344304167 | 2.989077325 | 0.08821607  | 0.088891438 | 0 |
| ACGGCCACACAGAGC-1   | 1745414 | 33669  | 187703 | 154960  | 1369082   | 442 | 0.0388508   | 4.169460667 | 3.132814775 | 0.089296365 | 0.089296365 | 0 |
| ACGGCGATCTCTGCT-1   | 2027816 | 67519  | 211866 | 174659  | 1573772   | 508 | 0.045693949 | 4.789875233 | 3.120302301 | 0.089259435 | 0.087321671 | 0 |
| ACGGGCTATCGGCTG-1   | 1082600 | 133573 | 97437  | 91438   | 740202    | 239 | 0.021415896 | 2.282546467 | 3.077201602 | 0.121474159 | 0.121474159 | 0 |
| ACGGGCTATGATGTT-1   | 1555772 | 19283  | 166411 | 132949  | 1237129   | 400 | 0.036089276 | 3.771228433 | 3.118545609 | 0.094627538 | 0.092835435 | 0 |
| ACGGGCTGTGTTCTCT-1  | 2180516 | 59532  | 224953 | 194276  | 1701755   | 550 | 0.049553681 | 5.1406903   | 3.046652366 | 0.084604635 | 0.082046355 | 0 |
| ACGGGCTGACGATGGA-1  | 1712888 | 19805  | 185174 | 138690  | 1368040   | 442 | 0.039957114 | 4.171670333 | 3.225529406 | 0.089381461 | 0.089452451 | 0 |
| ACGGGCTGCTGCTCTA-1  | 1148000 | 9419   | 123872 | 104283  | 911026    | 294 | 0.028611324 | 2.827043623 | 3.047678216 | 0.108579515 | 0.108595651 | 0 |
| ACGTGAAAGTTGGCG-1   | 2449318 | 41004  | 265303 | 216361  | 1926650   | 622 | 0.05619078  | 5.790395767 | 3.033245011 | 0.080239317 | 0.079049282 | 0 |
| ACGTGAAAGAGCGAG-1   | 2217700 | 51849  | 231815 | 1742234 | 1591802   | 563 | 0.050882196 | 5.277088233 | 3.027137011 | 0.084226197 | 0.083384547 | 0 |
| ACGTAACTTTGTGGG-1   | 1383764 | 24743  | 151157 | 118318  | 1089546   | 349 | 0.031795891 | 3.3498854   | 3.00124984  | 0.105654742 | 0.101124001 | 0 |
| ACTATCTAGAGGGCT-1   | 2340500 | 45750  | 244062 | 206087  | 1843701   | 596 | 0.051762996 | 5.561933233 | 3.079507383 | 0.081937808 | 0.079388974 | 0 |
| ACTATCTAGTAGTA-1    | 1137940 | 10603  | 109642 | 1102303 | 109642    | 356 | 0.032171528 | 3.3732043   | 2.936983713 | 0.101821901 | 0.101821901 | 0 |
| ACTATCTATGGCTAT-1   | 2381058 | 24025  | 260827 | 207782  | 1888424   | 610 | 0.055100183 | 5.672152967 | 2.989273054 | 0.081251062 | 0.079224372 | 0 |
| ACTATCTTCGGAAGC-1   | 2561748 | 31205  | 226690 | 2026565 | 65        | 65  | 0.0658808   | 3.388715224 | 3.095151303 | 0.094152367 | 0.094152367 | 1 |
| ACTATCTCTCGAACA-1   | 2087154 | 61595  | 221458 | 182462  | 1621629   | 524 | 0.047229503 | 4.9284405   | 3.082060409 | 0.084946899 | 0.085283728 | 0 |
| ACTATCTCTGTAGAT-1   | 1379718 | 5169   | 151366 | 122603  | 1100580   | 356 | 0.03223351  | 3.374320867 | 3.073016392 | 0.098855663 | 0.099042487 | 0 |
| ACTGAGACGATAACA-1   | 1813800 | 50069  | 157746 | 1409740 | 104170915 | 455 | 0.041107915 | 4.306480667 | 3.078844427 | 0.088706972 | 0.088138143 | 0 |
| ACTGAGACGATGGAT-1   | 1410344 | 18306  | 154109 | 116718  | 1121211   | 362 | 0.032742614 | 3.438070667 | 3.046910406 | 0.104102781 | 0.103905052 | 0 |
| ACTGAAACGCGGATC-1   | 2013756 | 61007  | 212582 | 178930  | 1561237   | 504 | 0.04551106  | 4.726465133 | 3.058466063 | 0.092290925 | 0.090675328 | 0 |
| ACTGAGTACGTTTAT-1   | 1102464 | 16367  | 91160  | 872157  | 91160     | 282 | 0.025079386 | 2.700768867 | 3.170097056 | 0.108313419 | 0.110268539 | 0 |
| ACTGAGTCTCTTAAC-1   | 2190698 | 22791  | 242101 | 192580  | 1733226   | 560 | 0.050604942 | 5.2344027   | 3.032377218 | 0.081031923 | 0.080287096 | 0 |
| ACTGAGTACGACTAT-1   | 2184730 | 22637  | 187936 | 179314  | 179314    | 559 | 0.050534506 | 5.223113867 | 3.080569091 | 0.088297215 | 0.083191471 | 0 |
| ACTGATGATACCAAT-1   | 2430222 | 13424  | 248744 | 211919  | 1935125   | 625 | 0.056503125 | 5.838303667 | 3.086903218 | 0.080059274 | 0.078694419 | 0 |
| ACTGATGATCGTAT-1    | 2376510 | 23895  | 257856 | 208841  | 1885198   | 609 |             |             |             |             |             |   |

|                     |         |        |         |         |           |             |              |             |             |             |             |   |
|---------------------|---------|--------|---------|---------|-----------|-------------|--------------|-------------|-------------|-------------|-------------|---|
| AGATAGCAAGCAAGC-1   | 2156808 | 44481  | 227759  | 190487  | 1694081   | 547         | 0.040406282  | 5.112295633 | 2.967717643 | 0.085479864 | 0.083294191 | 0 |
| AGATAGGTGAAGCA-1    | 1572888 | 52876  | 163326  | 143226  | 1213460   | 392         | 0.035362654  | 3.7213061   | 3.03423077  | 0.09707399  | 0.09707399  | 0 |
| AGAGCTTCTCAGTC-1    | 1918948 | 26735  | 230538  | 152943  | 152943    | 491         | 0.044235042  | 4.60427223  | 3.037907958 | 0.08856612  | 0.08856612  | 0 |
| AGAGCGAGCTCATC-1    | 2044638 | 35223  | 218603  | 168348  | 1622464   | 524         | 0.047287512  | 4.890652167 | 3.112790263 | 0.086209627 | 0.08564284  | 0 |
| AGAGCGAGCTGTGGA-1   | 1460250 | 22956  | 140562  | 128787  | 1159365   | 274         | 0.032863204  | 3.559882723 | 2.922124379 | 0.066894229 | 0.095514297 | 0 |
| AGAGCGAGTTGTGAG-1   | 2044704 | 49614  | 214486  | 1508938 | 1508938   | 517         | 0.046655888  | 4.850320467 | 2.958417389 | 0.086154322 | 0.084403797 | 0 |
| AGAGGATCCCAAGCA-1   | 1990708 | 49217  | 203124  | 171154  | 1567213   | 506         | 0.045460518  | 4.761051433 | 3.069060854 | 0.085818954 | 0.085188129 | 0 |
| AGAGGATCTCGCTT-1    | 528298  | 7433   | 45153   | 45646   | 430066    | 139         | 0.012160575  | 1.347902567 | 2.94249431  | 0.031001003 | 0.160100003 | 0 |
| AGAGCTAGCATGCG-1    | 1901952 | 23668  | 199568  | 176647  | 1502369   | 485         | 0.043834308  | 4.575904767 | 3.039466201 | 0.080964695 | 0.081844519 | 0 |
| AGAGCTTACTTTCTCA-1  | 1950338 | 65432  | 202472  | 175183  | 1507251   | 487         | 0.041876453  | 4.517817367 | 3.016754856 | 0.080704605 | 0.08891732  | 0 |
| AGAGTGGAGGATGGT-1   | 1550684 | 17525  | 165018  | 134619  | 1233522   | 398         | 0.035976035  | 3.7670254   | 3.109204667 | 0.086247216 | 0.096247216 | 0 |
| AGAGTGGCATCATGT-1   | 448824  | 14877  | 91631   | 68597   | 673719    | 218         | 0.019592001  | 2.075590933 | 2.926195227 | 0.12482493  | 0.127679228 | 0 |
| AGAGTGGATGAAAGT-1   | 1634482 | 32139  | 173472  | 144242  | 1275470   | 412         | 0.037343874  | 3.904129367 | 3.066307151 | 0.092746595 | 0.095522393 | 0 |
| AGAGTGGGTCAAGGC-1   | 1574718 | 62628  | 164436  | 135532  | 1212122   | 392         | 0.035291039  | 3.704511433 | 3.144035231 | 0.093973977 | 0.095234517 | 0 |
| AGAGTGGGTCTTCGC-1   | 2160054 | 42859  | 225552  | 195871  | 1693772   | 547         | 0.048381983  | 5.1403705   | 3.09598579  | 0.085432457 | 0.083441706 | 0 |
| AGATCTGCACAGTC-1    | 1302742 | 111607 | 130852  | 112584  | 947699    | 306         | 0.027392843  | 2.904960333 | 3.003018637 | 0.10801733  | 0.10833119  | 0 |
| AGATCTGTCTCTTGGA-1  | 1027810 | 17927  | 111568  | 89262   | 809053    | 261         | 0.0236172    | 2.506383433 | 3.151755517 | 0.110572562 | 0.111794884 | 0 |
| AGATTGTCAGCAAGTT-1  | 1725894 | 45722  | 184586  | 150101  | 1345525   | 435         | 0.039155553  | 4.076863833 | 3.144242657 | 0.095546842 | 0.09149757  | 0 |
| AGATTGTCAGATGTC-1   | 1755544 | 73194  | 160486  | 1358121 | 10394085  | 439         | 0.03940685   | 4.109750467 | 3.141270382 | 0.091289303 | 0.092521447 | 0 |
| AGATTGTCATGATGTC-1  | 2399312 | 52078  | 251012  | 214016  | 1842206   | 595         | 0.053201518  | 5.4074755   | 3.018030178 | 0.08795062  | 0.08479324  | 0 |
| AGATTGTCGACCGCA-1   | 1361138 | 25537  | 148711  | 122783  | 1064087   | 244         | 0.030926321  | 3.2684344   | 3.000365512 | 0.103068232 | 0.103068232 | 0 |
| AGATTGTCGCAAGAA-1   | 1617266 | 19635  | 172416  | 1287995 | 1287995   | 416         | 0.035767083  | 3.931505167 | 3.050215921 | 0.06062684  | 0.092561879 | 0 |
| AGAGCAAGGGTGAGT-1   | 2197878 | 29517  | 233974  | 198460  | 1735927   | 561         | 0.050672239  | 5.250421533 | 3.283035333 | 0.081620525 | 0.081620525 | 0 |
| AGAGCAAGGATGTATA-1  | 1620070 | 16473  | 177381  | 134373  | 1290743   | 417         | 0.037708206  | 3.941775667 | 3.110052196 | 0.093259462 | 0.090469856 | 0 |
| AGAGCGCTGTACCGGA-1  | 1443074 | 18203  | 155875  | 128620  | 1130476   | 365         | 0.032949363  | 3.478139333 | 3.14314121  | 0.101264371 | 0.098761295 | 0 |
| AGAGGCTCTACTGTT-1   | 1247746 | 13976  | 136865  | 99363   | 997269    | 322         | 0.02910808   | 3.051699333 | 3.086491249 | 0.104614137 | 0.101126923 | 0 |
| AGAGTCACAGATACGA-1  | 1474976 | 28637  | 130689  | 1161253 | 106815691 | 375         | 0.034785167  | 3.601550367 | 3.004777743 | 0.097256597 | 0.096088827 | 0 |
| AGATACCATCATGGT-1   | 1791440 | 16376  | 195068  | 152142  | 1426354   | 461         | 0.041667075  | 4.32791213  | 2.832952156 | 0.090749601 | 0.090749601 | 0 |
| AGCTTAAGTAGTAGT-1   | 2258660 | 59689  | 252197  | 206993  | 1837381   | 593         | 0.053447476  | 5.528049623 | 3.063301937 | 0.083021023 | 0.083341018 | 0 |
| AGCTTAAGCGTCATA-1   | 1577272 | 22571  | 171513  | 138100  | 1245088   | 402         | 0.036342669  | 3.811247    | 2.990751264 | 0.086830928 | 0.096221741 | 0 |
| AGCTTAAGTCTCTGCT-1  | 2205756 | 33923  | 236537  | 196392  | 1738904   | 562         | 0.050758799  | 5.262487333 | 3.01372348  | 0.081779361 | 0.082401627 | 0 |
| AGCTTAAGTGTGCTGT-1  | 1209060 | 25888  | 129084  | 110236  | 948852    | 305         | 0.027478375  | 2.903478767 | 3.040305344 | 0.104352378 | 0.104352378 | 0 |
| AGCTTAATCTACTGCT-1  | 1593474 | 58089  | 167157  | 149951  | 1218277   | 394         | 0.035471316  | 3.738384133 | 3.063203525 | 0.100146994 | 0.098470001 | 0 |
| AGCGCTGACGCTATGT-1  | 1023310 | 17482  | 108164  | 80445   | 819219    | 265         | 0.02188401   | 2.519530667 | 3.039068215 | 0.114023001 | 0.111648753 | 0 |
| AGCGCTGACAGACGGA-1  | 1365968 | 44907  | 143731  | 1025575 | 1052575   | 340         | 0.030660726  | 3.246291562 | 3.081231502 | 0.097617216 | 0.099952199 | 0 |
| AGCGCTGACGGCGTT-1   | 1148618 | 11613  | 121041  | 105371  | 910573    | 294         | 0.026531706  | 2.8174782   | 2.988449654 | 0.105665146 | 0.107953076 | 0 |
| AGCGCTGCTAACTGTC-1  | 1374064 | 26408  | 138507  | 117266  | 1091383   | 353         | 0.031798974  | 3.34729343  | 3.063481127 | 0.109992184 | 0.106360754 | 1 |
| AGCGCTGCTACTCTGA-1  | 919006  | 18041  | 82387   | 725261  | 234       | 0.021152135 | 2.257329233  | 2.922124949 | 0.124304729 | 0.123691695 | 0           |   |
| AGCGGCTCTAGCGCT-1   | 1270890 | 29976  | 185616  | 158431  | 1350867   | 436         | 0.038930163  | 4.121038333 | 2.861561308 | 0.094711954 | 0.092806781 | 0 |
| AGCGTATAGGCTACTCT-1 | 2271176 | 38756  | 238477  | 206459  | 1788294   | 578         | 0.05174908   | 5.2981225   | 3.129334404 | 0.084654327 | 0.085006466 | 0 |
| AGCGTATAGTGTGGGA-1  | 1763302 | 21936  | 185483  | 160013  | 1395870   | 451         | 0.040754746  | 4.247786023 | 3.099565993 | 0.092988907 | 0.088487388 | 0 |
| AGCGTGACATCACTCT-1  | 329072  | 21274  | 24516   | 27433   | 255849    | 83          | 0.007439767  | 0.808143192 | 3.091444192 | 0.202630239 | 0.191800209 | 0 |
| AGCTCTAGACTGCTCA-1  | 1971326 | 52313  | 181848  | 1528635 | 1528635   | 494         | 0.04484478   | 4.6452097   | 3.045161703 | 0.088070476 | 0.085352278 | 0 |
| AGCTCTAGGATGCTGT-1  | 2353854 | 20983  | 253451  | 216555  | 1867565   | 603         | 0.054495186  | 5.618355233 | 2.999019629 | 0.080396102 | 0.080759701 | 0 |
| AGCTCTAGTACTACT-1   | 1787878 | 24588  | 194388  | 155884  | 1413318   | 457         | 0.041262715  | 4.305795233 | 3.067225936 | 0.085437463 | 0.086391348 | 0 |
| AGCTCTGTGATAGTGA-1  | 654126  | 9848   | 62407   | 529729  | 52142     | 171         | 0.01547593   | 1.6000558   | 3.065543045 | 0.138996835 | 0.138320039 | 0 |
| AGCTCTCTGAAGTTGT-1  | 2480190 | 25318  | 273164  | 219795  | 1961913   | 634         | 0.057235343  | 5.895325367 | 3.110919332 | 0.077788927 | 0.077247803 | 0 |
| AGCTCTACGCCGGTAA-1  | 1252874 | 15948  | 129536  | 128693  | 1129165   | 394         | 0.035608948  | 3.726566233 | 2.993757024 | 0.09378936  | 0.094398821 | 0 |
| AGCTCTCAGTTAGCGG-1  | 1500094 | 45535  | 158841  | 139343  | 1157375   | 274         | 0.03375253   | 3.550303967 | 3.056084258 | 0.102155779 | 0.098523681 | 0 |
| AGCTCTGTCGACACGG-1  | 1331684 | 33482  | 141517  | 117259  | 1039426   | 336         | 0.030322955  | 3.204334967 | 3.117052772 | 0.10090187  | 0.10166473  | 0 |
| AGCTCTGCTACTCGG-1   | 1850180 | 51131  | 194030  | 1438843 | 1438843   | 465         | 0.04601515   | 4.3804516   | 3.036522023 | 0.089909879 | 0.089106476 | 0 |
| AGCTCTGCTGATATCC-1  | 2812576 | 58022  | 295117  | 254261  | 2205176   | 712         | 0.061958728  | 6.489611833 | 3.075038361 | 0.081157894 | 0.079902206 | 0 |
| AGCTCTCTGAAGTTGT-1  | 3199056 | 31623  | 367746  | 277568  | 2682119   | 866         | 0.078285905  | 7.913030467 | 4.325234842 | 0.125119579 | 0.125119579 | 1 |
| AGCTTAAGAGGCCGTT-1  | 1720304 | 23476  | 147660  | 1362792 | 147660    | 440         | 0.0398285946 | 4.1376249   | 3.016888605 | 0.095196976 | 0.089403883 | 0 |
| AGCTTAAGTGCCTGTC-1  | 1053408 | 52122  | 89896   | 88481   | 811819    | 263         | 0.023684823  | 2.5099128   | 4.69863845  | 0.152915307 | 0.152915307 | 1 |
| AGCTTAAGCATCTGAT-1  | 1968272 | 23166  | 216453  | 177244  | 1555309   | 503         | 0.045311812  | 4.6991641   | 2.914184009 | 0.09464809  | 0.092702729 | 1 |
| AGCTTAAGTCAACTGTC-1 | 2299620 | 42004  | 250500  | 200548  | 1805578   | 583         | 0.052700057  | 5.4480005   | 3.108063195 | 0.0833082   | 0.082573029 | 0 |
| AGGCGACAGATCTGAA-1  | 1749286 | 27152  | 185499  | 151857  | 1384778   | 447         | 0.040337724  | 4.21384167  | 3.07027338  | 0.087132657 | 0.086564727 | 0 |
| AGGCGACAGTTTGGCT-1  | 2204000 | 30928  | 1737632 | 1979792 | 1979792   | 561         | 0.050733872  | 5.249486267 | 3.048412873 | 0.083782048 | 0.080772231 | 0 |
| AGGCGACGTTGGCGTC-1  | 1423172 | 37314  | 150379  | 125953  | 1109526   | 358         | 0.032134932  | 3.406177833 | 3.000369121 | 0.09677111  | 0.098356915 | 0 |
| AGGCGACTCAAGAGGC-1  | 1892180 | 38572  | 203662  | 163886  | 1487060   | 480         | 0.043325615  | 4.517488    | 2.966464216 | 0.080024812 | 0.08094511  | 0 |
| AGGCGACTCAACCGGA-1  | 1603934 | 12574  | 170544  | 144874  | 1255942   | 406         | 0.036584129  | 3.844998967 | 3.140054411 | 0.090084149 | 0.091609034 | 0 |
| AGGCGACTCATGCTAG-1  | 409572  | 3201   | 43476   | 33921   | 328974    | 106         | 0.009612159  | 1.038991633 | 3.038397625 | 0.181373079 | 0.175496421 | 0 |
| AGGCGCTAGCAAGGTC-1  | 1583174 | 15312  | 13501   | 1261281 | 13501     | 407         | 0.036874958  | 3.866255933 | 3.143004247 | 0.094611507 | 0.093961567 | 0 |
| AGGCGGTATAGTGA-1    | 1649579 | 19734  | 178405  | 136028  | 1215411   | 425         | 0.038264494  | 4.0286358   | 3.023341341 | 0.09412431  | 0.094274613 | 0 |
| AGGCGGTCTTAGGTT-1   | 417406  | 4283   | 44720   | 32526   | 335877    | 108         | 0.009887153  | 1.0562403   | 3.034644328 | 0.182642423 | 0.182642423 | 0 |
| AGGCGGTCTCTTATT-1   | 750668  | 22606  | 59082   | 79750   | 588930    | 190         | 0.017158877  | 1.8215811   | 3.034321417 | 0.128367768 | 0.132757568 | 0 |
| AGGCGGTGTGTGATC-1   | 1148566 | 27913  | 119625  | 100513  | 900515    | 291         | 0.026291303  | 2.780406433 | 2.999424769 | 0.114266837 | 0.110833141 | 0 |
| AGGCGGTGTGTAGGT-1   | 1803584 | 17503  | 193153  | 150139  | 1440789   | 465         | 0.042106187  | 4.387917567 | 3.034321947 | 0.091926877 | 0.091042759 | 0 |
| AGGCGGTCTGCGACAA-1  | 1537946 | 13667  | 129639  | 1226080 | 1226080   | 396         | 0.035788126  | 3.748041633 | 2.999239981 | 0.09794165  | 0.096891759 | 0 |
| AGGGAGTCTGCTAGTA-1  | 878680  | 12731  | 93741   | 73801   | 696587    | 225         | 0.020275435  | 2.152470567 | 3.099620009 | 0.118109483 | 0.119282838 | 0 |
| AGGGATAGGCGATTGG-1  | 1663006 | 31429  | 180490  | 138202  | 1312885   | 424         | 0.038138826  | 4.014689167 | 3.035017576 | 0.095834927 | 0.092147237 | 0 |
| AGGGATAGGAACTGCT-1  | 1403128 | 40333  | 150137  | 120017  | 1081641   | 349         | 0.031482126  | 3.324889367 | 3.169808847 | 0.099356491 | 0.101238004 | 0 |
| AGGGATGTATATGTG-1   | 1149506 | 19981  | 124271  | 90984   | 9146      |             |              |             |             |             |             |   |

|                     |         |        |        |         |         |     |              |             |              |             |             |   |
|---------------------|---------|--------|--------|---------|---------|-----|--------------|-------------|--------------|-------------|-------------|---|
| AGTGGGAGCTGAAAT-1   | 1480226 | 36794  | 157588 | 132216  | 1163528 | 376 | 0.033895017  | 3.557828    | 3.108770235  | 0.088696462 | 0.097026677 | 0 |
| AGTGGGATGTCACAGC-1  | 1978564 | 42869  | 208403 | 180238  | 1547054 | 500 | 0.0451061961 | 4.709262133 | 3.047462059  | 0.087613557 | 0.089622417 | 0 |
| AGTGG9ATGTCAGCG-1   | 580084  | 177657 | 44217  | 38054   | 332156  | 107 | 0.008612948  | 1.042086633 | 3.121591014  | 0.161950816 | 0.161950816 | 0 |
| AGTGG5ATGTCGGACC-1  | 1927970 | 53434  | 200149 | 174713  | 1499674 | 484 | 0.04582292   | 4.5523864   | 3.140047447  | 0.000020696 | 0.088305152 | 0 |
| AGTGTCAATGTAGCT-1   | 1892566 | 57650  | 197711 | 172724  | 1465021 | 473 | 0.042408426  | 4.405495567 | 3.113802166  | 0.093100892 | 0.091984156 | 0 |
| AGTGTGATGACTGAT-1   | 2299514 | 12851  | 245912 | 203154  | 1827597 | 590 | 0.051315924  | 5.4916656   | 3.174907131  | 0.000070401 | 0.080070401 | 0 |
| AGTGTATCGAGGCTG-1   | 459060  | 45085  | 36791  | 36910   | 340334  | 130 | 0.009900517  | 1.060982567 | 3.075239806  | 0.069168897 | 0.167422671 | 0 |
| AGTGTGTCAACAGAGC-1  | 2297322 | 47934  | 220722 | 142853  | 1805461 | 583 | 0.050563154  | 5.488442233 | 3.060757591  | 0.081721516 | 0.081095118 | 0 |
| AGTGTGGTACTTCAG-1   | 1380784 | 19083  | 148848 | 123652  | 1089201 | 352 | 0.031800664  | 3.348369933 | 3.119308321  | 0.100975167 | 0.09953487  | 0 |
| AGTGTGGTGTCTGAT-1   | 2197724 | 28037  | 238073 | 185774  | 1745840 | 564 | 0.050088742  | 5.2592854   | 3.114121037  | 0.086512712 | 0.081922449 | 0 |
| ATAACGGCCAACTGGAG-1 | 1633966 | 27716  | 13748  | 178350  | 133748  | 418 | 0.037747828  | 3.9454821   | 2.992149814  | 0.093127091 | 0.093264072 | 0 |
| ATAACGCCACTCTCCG-1  | 1491974 | 129592 | 147673 | 126689  | 1091660 | 353 | 0.031778458  | 3.356884067 | 3.080169376  | 0.09975734  | 0.09975734  | 0 |
| ATAACGGCTGCGATT-1   | 1066366 | 13213  | 111443 | 87408   | 854302  | 276 | 0.024875644  | 2.628202423 | 3.011752509  | 0.110566624 | 0.109381002 | 0 |
| ATAACGGCGTCTGAC-1   | 1482980 | 60366  | 150134 | 136338  | 1136142 | 367 | 0.033069285  | 3.479349867 | 3.098668788  | 0.09676066  | 0.097489479 | 0 |
| ATAACGGCTCACTCG-1   | 1398418 | 87900  | 137189 | 116187  | 1018142 | 329 | 0.028927614  | 3.135118967 | 3.038464608  | 0.103004904 | 0.104082418 | 0 |
| ATAAGAGAGGCGCTTG-1  | 962836  | 18972  | 96333  | 766160  | 81371   | 247 | 0.021368929  | 2.368318    | 2.923421025  | 0.111649964 | 0.1138576   | 0 |
| ATAAGAGATGACCGA-1   | 1766028 | 24052  | 184462 | 162312  | 1395202 | 451 | 0.040708318  | 4.254402967 | 3.021925344  | 0.091070329 | 0.08999183  | 0 |
| ATAAGAGCAAGCTGAC-1  | 1923086 | 40185  | 192026 | 172885  | 1517790 | 490 | 0.044731089  | 4.4048337   | 3.047490745  | 0.089157223 | 0.087402921 | 0 |
| ATAAGAGATCGCTGCT-1  | 2169468 | 76623  | 222539 | 186154  | 1683432 | 544 | 0.049035212  | 5.074314067 | 3.177838879  | 0.083288885 | 0.084084245 | 0 |
| ATAGCCCGTACCGCTG-1  | 1066608 | 32690  | 109798 | 93470   | 830650  | 268 | 0.024171501  | 2.5663864   | 3.046567775  | 0.114307193 | 0.109126515 | 0 |
| ATAGACCGTCCGAATT-1  | 1429948 | 40923  | 145886 | 123415  | 1109724 | 358 | 0.032328595  | 3.3929711   | 3.038751651  | 0.093175952 | 0.094536517 | 0 |
| ATACAGGAGTACTAGT-1  | 1363550 | 10270  | 151820 | 114518  | 1086492 | 351 | 0.031754131  | 3.327122167 | 3.093358329  | 0.102322145 | 0.100989869 | 0 |
| ATCATCTCATACGGA-1   | 1111666 | 57838  | 134091 | 99594   | 843783  | 273 | 0.024518388  | 2.6064885   | 3.041226719  | 0.115098106 | 0.114188872 | 0 |
| ATCATCTGTGCGAAMC-1  | 2000480 | 64865  | 216164 | 190571  | 1588880 | 513 | 0.046243751  | 4.809747367 | 2.706779126  | 0.086284701 | 0.0867528   | 0 |
| ATCATGAGTCCAGAG-1   | 1407318 | 16771  | 152163 | 124295  | 1114089 | 360 | 0.032485614  | 3.429469933 | 3.094611289  | 0.088210797 | 0.09773197  | 0 |
| ATCCGAACGCGCAAG-1   | 1578844 | 38222  | 172314 | 134998  | 1233310 | 398 | 0.039597912  | 3.789150133 | 3.080589255  | 0.096002777 | 0.094600629 | 0 |
| ATCCGAACAGTAATTC-1  | 2136110 | 27536  | 226911 | 199460  | 1637203 | 529 | 0.041484221  | 4.4899613   | 3.091800502  | 0.098932189 | 0.088214773 | 0 |
| ATCCGAACATCTCGA-1   | 1630784 | 15642  | 179768 | 141355  | 1294019 | 418 | 0.037714044  | 3.945072    | 3.031704198  | 0.09351833  | 0.092960022 | 0 |
| ATCGAGTGTGCGAAGT-1  | 2008700 | 37408  | 211820 | 176055  | 1581477 | 511 | 0.046189328  | 4.7865537   | 3.024615079  | 0.08520628  | 0.08561549  | 0 |
| ATCGAGTCTGTGGAAC-1  | 2395576 | 46901  | 216437 | 216339  | 1871899 | 605 | 0.054497131  | 5.6056252   | 3.097042278  | 0.08097007  | 0.07954362  | 0 |
| ATCTCACTGGAGTGGG-1  | 2243542 | 25224  | 242087 | 194336  | 1783175 | 576 | 0.052102973  | 5.372276467 | 3.062166372  | 0.081461322 | 0.097335945 | 0 |
| ATCTCACTAGTCAAGC-1  | 1238714 | 77336  | 123496 | 105423  | 912459  | 295 | 0.026521964  | 2.813396533 | 3.037725533  | 0.113991438 | 0.111485821 | 0 |
| ATCTACTGTTGGCTGT-1  | 2018732 | 24268  | 238536 | 174761  | 1601367 | 517 | 0.046717501  | 4.852393867 | 3.083351685  | 0.084552506 | 0.085514678 | 0 |
| ATCTACTGATGCTGTC-1  | 1869846 | 61539  | 197307 | 169369  | 1441631 | 466 | 0.041918418  | 4.3723061   | 3.09101308   | 0.09258904  | 0.092595723 | 0 |
| ATCTCGCATTCGTTT-1   | 1907868 | 52012  | 157952 | 1491723 | 1491723 | 482 | 0.04146324   | 4.524551767 | 3.087888905  | 0.091088702 | 0.090487793 | 0 |
| ATCTCGGTGATGCTCG-1  | 1474172 | 58169  | 155039 | 125925  | 1135039 | 367 | 0.032977291  | 3.172968533 | 2.919518031  | 0.100677608 | 0.096420616 | 0 |
| ATCTCGCTCCGCATT-1   | 2162360 | 27429  | 245848 | 205020  | 1784063 | 576 | 0.05181607   | 5.352986367 | 3.021787313  | 0.082319085 | 0.08157567  | 0 |
| ATGAGGGAGGAGGTAGA-1 | 1567174 | 14967  | 160020 | 134004  | 1251183 | 404 | 0.036575347  | 3.8403556   | 3.070503168  | 0.098352275 | 0.095818013 | 0 |
| ATGAGGGAGTGTGCTG-1  | 1008106 | 17222  | 107020 | 90035   | 793829  | 256 | 0.023240011  | 2.469176367 | 3.032866383  | 0.116876157 | 0.116876157 | 0 |
| ATGAGGGTCTGACCAAG-1 | 1942688 | 56312  | 205040 | 174595  | 1508741 | 487 | 0.049375265  | 4.5877036   | 3.049438059  | 0.088278537 | 0.087012533 | 0 |
| ATGCGATGATCAGAGC-1  | 1909072 | 52262  | 201697 | 169549  | 1485564 | 480 | 0.043211391  | 4.500713433 | 3.075562975  | 0.0893428   | 0.087521728 | 0 |
| ATGCGATGTCAAGTTC-1  | 2058878 | 104904 | 211876 | 184501  | 1557597 | 603 | 0.045104044  | 4.6538391   | 3.179768897  | 0.090574869 | 0.088390852 | 0 |
| ATGCGATGTGATCTCA-1  | 2085366 | 33770  | 224296 | 184043  | 1643257 | 531 | 0.04794138   | 4.960367333 | 3.071308547  | 0.087765191 | 0.087266572 | 0 |
| ATGCGATGTTTAGGA-1   | 1470398 | 18040  | 158690 | 124689  | 1168939 | 378 | 0.034072363  | 3.5788921   | 3.121255826  | 0.095206095 | 0.094863344 | 0 |
| ATGGGAGAGTCTCCAG-1  | 1766016 | 34326  | 189818 | 158677  | 1383195 | 447 | 0.040208424  | 4.2134806   | 3.035173595  | 0.094134316 | 0.090766932 | 0 |
| ATGGGAGAGTCCGTGC-1  | 1385244 | 60296  | 139029 | 1063980 | 1063980 | 344 | 0.030932442  | 3.262052533 | 3.137004396  | 0.102294989 | 0.101197135 | 0 |
| ATGGGAGTCTGGAGAGT-1 | 1975858 | 34805  | 209927 | 169141  | 1561985 | 505 | 0.046169693  | 4.735090867 | 2.959424902  | 0.088888111 | 0.086337311 | 0 |
| ATGGGAGTCTTAAGGC-1  | 1826300 | 67326  | 150514 | 156042  | 1410418 | 456 | 0.041097733  | 4.296669133 | 3.1151217947 | 0.089298604 | 0.089298604 | 0 |
| ATGGGAGTCTCTCAAC-1  | 2084424 | 22514  | 225818 | 184041  | 1652051 | 534 | 0.048239738  | 5.0021236   | 3.106227575  | 0.082307849 | 0.081645377 | 0 |
| ATGTGTGCGAAGGTAA-1  | 2569986 | 39138  | 275783 | 228889  | 2026176 | 655 | 0.05914677   | 6.091579033 | 3.188429787  | 0.075207603 | 0.075189977 | 0 |
| ATGTGTGTGCTGTCT-1   | 1995796 | 74139  | 177756 | 208644  | 1540257 | 498 | 0.04788475   | 4.617808547 | 3.158438695  | 0.090986539 | 0.090986539 | 0 |
| ATTACTCAAGTATCC-1   | 1337548 | 26864  | 141917 | 116809  | 1051958 | 340 | 0.030764996  | 3.250707433 | 3.011244605  | 0.10575499  | 0.106121129 | 0 |
| ATTACTCCACAGCGG-1   | 1548624 | 45305  | 160553 | 137239  | 1202327 | 388 | 0.030301052  | 3.676174233 | 3.047240051  | 0.088126055 | 0.099315894 | 0 |
| ATTACTCATCCCAAA-1   | 1987428 | 16436  | 219320 | 154340  | 1597332 | 516 | 0.046582195  | 4.822011433 | 3.771541333  | 0.141879491 | 0.140008827 | 1 |
| ATTACTCGTAAAGTCA-1  | 1744250 | 52039  | 180308 | 156162  | 1355741 | 438 | 0.039483127  | 4.127583    | 2.955779366  | 0.094309345 | 0.093588856 | 0 |
| ATTACTCTGAGCGTCC-1  | 1670256 | 59466  | 164515 | 141006  | 1301249 | 420 | 0.041967569  | 3.948923767 | 3.001519412  | 0.100548367 | 0.09522938  | 0 |
| ATTATCAAGCATAGAC-1  | 2127680 | 39668  | 243227 | 193510  | 1742585 | 563 | 0.050813994  | 5.2627629   | 3.062954025  | 0.084168073 | 0.081576049 | 0 |
| ATTATCAAGGATGACC-1  | 2707544 | 35067  | 289054 | 243790  | 2139633 | 691 | 0.062329197  | 6.382326533 | 3.136278382  | 0.078477025 | 0.076157035 | 0 |
| ATTATCTCCGATAGA-1   | 2139058 | 12181  | 196304 | 1691052 | 1491052 | 546 | 0.108317571  | 5.108521867 | 2.777008261  | 0.085566331 | 0.085566331 | 0 |
| ATTCTACAGAGCCAA-1   | 2060292 | 22490  | 219590 | 182448  | 1635764 | 528 | 0.0477225    | 4.954347167 | 2.944145706  | 0.093042607 | 0.093128964 | 1 |
| ATTCTACAGTATAG-1    | 2064024 | 14793  | 238841 | 169338  | 1651052 | 533 | 0.048195085  | 4.985337567 | 2.963087677  | 0.085301675 | 0.084175553 | 0 |
| ATTCTACAGTATGCT-1   | 2596256 | 36888  | 281287 | 229536  | 2048945 | 662 | 0.095551579  | 6.0883123   | 2.889989153  | 0.081210287 | 0.081210287 | 0 |
| ATTCTACAGGCGTGG-1   | 1452184 | 56756  | 152366 | 126294  | 1117168 | 361 | 0.03255095   | 3.4311143   | 3.105762673  | 0.104128246 | 0.100776669 | 0 |
| ATTCTACGTGGAGAGA-1  | 1951534 | 24363  | 169634 | 141647  | 1255890 | 406 | 0.038730197  | 3.144478617 | 3.054478617  | 0.093045158 | 0.090407604 | 0 |
| ATTCTACTCTCTCAG-1   | 1530214 | 16220  | 164234 | 126805  | 1202285 | 389 | 0.035126408  | 3.6800359   | 3.127884749  | 0.098632769 | 0.09047671  | 0 |
| ATTTGACCTGACGGC-1   | 1502062 | 34205  | 155188 | 141608  | 1171061 | 378 | 0.034091309  | 3.5875004   | 3.118877292  | 0.102057624 | 0.098510656 | 0 |
| ATTTGATGGGATGACC-1  | 2888304 | 36297  | 264693 | 2289641 | 264693  | 740 | 0.059889811  | 6.730545967 | 3.134991334  | 0.080125052 | 0.076938884 | 0 |
| ATTTGATGACTAAGGG-1  | 1321824 | 25484  | 140623 | 108817  | 1045900 | 338 | 0.030539829  | 3.217182233 | 3.104999301  | 0.103206742 | 0.101168889 | 0 |
| ATTTGTTGTCGCAAGG-1  | 1482642 | 49639  | 154248 | 132413  | 1146712 | 370 | 0.033131927  | 3.504995833 | 3.10595829   | 0.095741267 | 0.096858061 | 0 |
| ATTTTGATGAGGTGTC-1  | 1845118 | 93176  | 189058 | 165375  | 1397509 | 451 | 0.040489794  | 4.219122133 | 2.985819783  | 0.09149749  | 0.090020103 | 0 |
| ATTTTGACAGAGCG-1    | 1595764 | 45601  | 169772 | 140549  | 1239842 | 401 | 0.036164772  | 3.794070993 | 3.047636296  | 0.088452769 | 0.096132399 | 0 |
| ATTTTGACTACTGTC-1   | 1008686 | 21032  | 101333 | 87373   | 793008  | 256 | 0.02312485   | 2.451968367 | 3.038147209  | 0.117774506 | 0.114191546 | 0 |
| ATTTTGTTGACAGCGC-1  | 1453340 | 97174  | 150025 | 124296  | 1081745 | 349 | 0.031395006  | 3.320482627 | 3.034474946  | 0.100164721 | 0.098925344 | 0 |
| CAACCAAGTACGGGA-1   | 1597864 | 21992  | 172280 | 146078  | 1257514 | 408 | 0.036706816  | 3.86312     |              |             |             |   |

|                     |         |        |        |         |           |      |              |             |             |             |             |   |
|---------------------|---------|--------|--------|---------|-----------|------|--------------|-------------|-------------|-------------|-------------|---|
| CAAGATCTCACAGTA-1   | 993934  | 12484  | 107692 | 81580   | 790358    | 235  | 0.02301342   | 2.435300633 | 3.037202994 | 0.121628821 | 0.116786107 | 0 |
| CAGGCGCCAAACCTTA-1  | 1982342 | 34460  | 232086 | 177331  | 1560365   | 504  | 0.045499442  | 4.738578333 | 3.207876622 | 0.084360017 | 0.084360017 | 0 |
| CAGGCGCGTCACTGG-1   | 1642794 | 16366  | 174084 | 130650  | 1301694   | 420  | 0.037984392  | 3.980356533 | 3.045971052 | 0.094415553 | 0.094415553 | 0 |
| CAAGTGTCTCGGGAT-1   | 2345074 | 44713  | 249073 | 205616  | 1845672   | 596  | 0.053863238  | 5.560302867 | 3.143348322 | 0.082821352 | 0.083367102 | 0 |
| CAGAACCGAGATCA-1    | 1729028 | 67888  | 182399 | 160697  | 1238034   | 426  | 0.038266752  | 4.008094767 | 3.032866651 | 0.09635951  | 0.091907152 | 0 |
| CACAAACCGAGCTTG-1   | 1351118 | 17069  | 145960 | 120904  | 1067185   | 345  | 0.031105434  | 3.278082667 | 2.986091577 | 0.096943961 | 0.097064539 | 0 |
| CACAAACCAACGA-1     | 1165286 | 17462  | 128755 | 96458   | 922561    | 298  | 0.026889665  | 2.838878167 | 3.047493958 | 0.11209445  | 0.109224276 | 0 |
| CACAACTCTGAGAGGT-1  | 2444022 | 24979  | 260409 | 206032  | 1944602   | 628  | 0.056820198  | 5.843151667 | 3.049721166 | 0.082299467 | 0.079579961 | 0 |
| CAGACAAGTACGTTG-1   | 928990  | 20228  | 101387 | 79988   | 728787    | 235  | 0.021232293  | 2.263496533 | 3.01746625  | 0.117343272 | 0.116471876 | 0 |
| CACACAAGTGTCACTA-1  | 1933074 | 34106  | 212271 | 170927  | 1515770   | 490  | 0.044184454  | 4.400446    | 3.137858782 | 0.084475217 | 0.084982044 | 0 |
| CACACTGTACGTGGC-1   | 2062368 | 35032  | 230476 | 1629023 | 1629023   | 523  | 0.047089689  | 4.889799167 | 3.141059062 | 0.0865887   | 0.086588862 | 0 |
| CACATCTAGACGTGGA-1  | 2053630 | 22949  | 217545 | 180651  | 1627075   | 526  | 0.047478526  | 4.942961233 | 3.141051047 | 0.082146815 | 0.083602286 | 0 |
| CACACTCAGCGTAGTG-1  | 1292989 | 6994   | 129638 | 95522   | 960934    | 310  | 0.028099984  | 2.955771223 | 3.122402149 | 0.106505345 | 0.103953171 | 0 |
| CACACTGTTAAAGGT-1   | 2103860 | 23152  | 230295 | 182487  | 1667926   | 539  | 0.048760026  | 5.048418333 | 3.009089841 | 0.08461972  | 0.08477514  | 0 |
| CACATCTCTCAAGCTTG-1 | 1393056 | 9662   | 152476 | 103334  | 1093544   | 353  | 0.031936724  | 3.341532667 | 3.001150617 | 0.086827228 | 0.096331187 | 0 |
| CACACTCTCTCTTGA-1   | 2613982 | 33908  | 289054 | 199878  | 2091142   | 676  | 0.06108842   | 6.2823981   | 2.712066405 | 0.114845132 | 0.114845132 | 1 |
| CAGAGGECATAGTGTG-1  | 2029364 | 38403  | 212992 | 170413  | 1607356   | 519  | 0.046819379  | 4.855385333 | 2.998415799 | 0.092037576 | 0.086417265 | 0 |
| CACAGGCGTAGTCTGT-1  | 2309698 | 28174  | 230334 | 204225  | 1826965   | 590  | 0.051342574  | 5.4959476   | 3.164826655 | 0.078063489 | 0.078661936 | 0 |
| CACAGGCTCGCTACTAC-1 | 2688526 | 49236  | 249771 | 2104363 | 2043957   | 680  | 0.063367495  | 6.295448267 | 2.876395234 | 0.072178987 | 0.072151862 | 0 |
| CACATAAGTGTGACTAC-1 | 2200514 | 39005  | 237214 | 195653  | 1730732   | 559  | 0.050397763  | 5.219707967 | 3.081170377 | 0.086395515 | 0.085912878 | 0 |
| CACATAGAGGTATCGG-1  | 1183238 | 10650  | 126100 | 108276  | 928322    | 303  | 0.027391     | 2.892459    | 2.954234212 | 0.114091348 | 0.110658295 | 0 |
| CACATAGAGTGTGCTG-1  | 1515588 | 57818  | 155019 | 134938  | 1167813   | 377  | 0.033978205  | 3.580842433 | 3.180359565 | 0.096275507 | 0.092517389 | 0 |
| CACATAGTACCACTTG-1  | 1050146 | 17569  | 113673 | 88780   | 830124    | 268  | 0.024182653  | 2.565279033 | 3.093081386 | 0.110535305 | 0.112199818 | 0 |
| CACATAGGTCAATAG-1   | 1199238 | 12084  | 131995 | 93874   | 961285    | 311  | 0.028054842  | 2.950229667 | 3.188003531 | 0.109001293 | 0.108935086 | 0 |
| CACATAGGTGTGTAAG-1  | 2256402 | 20803  | 252947 | 197040  | 1885612   | 609  | 0.05507309   | 5.6918504   | 3.06920639  | 0.080363426 | 0.080363426 | 0 |
| CACATAGTCTCACTTT-1  | 1270040 | 47238  | 135468 | 104184  | 983150    | 318  | 0.028613145  | 3.035816267 | 3.049484492 | 0.106395602 | 0.101756911 | 0 |
| CACATATGAGGAGTA-1   | 1491390 | 19800  | 161357 | 1178990 | 1178990   | 381  | 0.034902231  | 3.6129607   | 2.948396352 | 0.098825822 | 0.098825822 | 0 |
| CACATTAAGGATCGAC-1  | 1789962 | 34177  | 185234 | 172467  | 1397084   | 451  | 0.040719766  | 4.253678067 | 3.046801074 | 0.094188534 | 0.092212784 | 0 |
| CAGATTTATGGAGAC-1   | 1666454 | 92810  | 172264 | 142753  | 1257627   | 406  | 0.036591425  | 3.8943276   | 3.035002735 | 0.096454132 | 0.094607793 | 0 |
| CAGATTTGTGCTCTCT-1  | 1757246 | 15783  | 174886 | 1299170 | 1299170   | 420  | 0.03781055   | 3.9602074   | 3.001122191 | 0.095752837 | 0.095752837 | 0 |
| CAGATTTGTTCTCTCG-1  | 2148104 | 51278  | 231960 | 185871  | 1678995   | 542  | 0.048864179  | 5.048380467 | 3.042188087 | 0.08653235  | 0.086379882 | 0 |
| CACCACTCTCAACAGC-1  | 1668386 | 59918  | 176146 | 149692  | 1287560   | 416  | 0.03402382   | 3.526390567 | 3.048625072 | 0.097937564 | 0.093402462 | 0 |
| CACCACTGTCACTGTG-1  | 1236502 | 9603   | 145111 | 104483  | 1057305   | 342  | 0.030818023  | 3.234075733 | 3.20006642  | 0.105972239 | 0.103616163 | 0 |
| CACCAAGGACAGAGTA-1  | 1539360 | 19763  | 173814 | 129296  | 1238487   | 400  | 0.03612783   | 3.785085533 | 3.129586802 | 0.095688047 | 0.096364331 | 0 |
| CACCAAGGAGGAGTA-1   | 1392524 | 17119  | 150017 | 121675  | 1103713   | 357  | 0.028299892  | 3.404832733 | 3.049786062 | 0.098582256 | 0.09849105  | 0 |
| CACCAAGGCACTCTCT-1  | 1906360 | 104015 | 196994 | 170916  | 1434435   | 463  | 0.041766678  | 4.3389478   | 3.070338194 | 0.091130537 | 0.087684687 | 0 |
| CACAGGAGCGGCTGT-1   | 1937944 | 30805  | 208009 | 176708  | 1521522   | 491  | 0.044396381  | 4.6231115   | 3.067488367 | 0.090932528 | 0.088236177 | 0 |
| CACAGGAGCACTTCT-1   | 1964936 | 116751 | 198865 | 176890  | 1469430   | 475  | 0.042561497  | 4.423673    | 3.049172291 | 0.091001425 | 0.089485077 | 0 |
| CACCTTGAGCTCTCTG-1  | 1680208 | 30158  | 179114 | 152624  | 1320132   | 426  | 0.038484609  | 4.048634663 | 3.077061301 | 0.096785777 | 0.091425229 | 0 |
| CACCTTGTGAGACAG-1   | 1506556 | 13544  | 165383 | 126112  | 1201517   | 388  | 0.035047324  | 3.675612133 | 2.999730005 | 0.097557947 | 0.096757213 | 0 |
| CACCTTGACAGAGTG-1   | 1167746 | 7345   | 129372 | 96153   | 934876    | 302  | 0.02723624   | 2.875836267 | 2.769659649 | 0.112960963 | 0.108018225 | 0 |
| CACCTTGTCCAGCTG-1   | 1201956 | 10851  | 130159 | 101537  | 959429    | 310  | 0.027912864  | 2.948543467 | 3.114056733 | 0.105995445 | 0.106104133 | 0 |
| CACCTCAAGAGAGCTG-1  | 1537726 | 14797  | 169430 | 122089  | 1178990   | 394  | 0.035390546  | 3.7114128   | 3.002130863 | 0.099970291 | 0.099709322 | 0 |
| CACCTCAAGTGTCTAT-1  | 394044  | 36235  | 431076 | 350455  | 3128688   | 1011 | 0.091421551  | 9.2212511   | 3.141047874 | 0.062160342 | 0.063227201 | 0 |
| CAGAACTCAGGATGGG-1  | 2840352 | 24671  | 308520 | 243478  | 2263683   | 731  | 0.066114011  | 6.7573483   | 3.108206474 | 0.081856135 | 0.081856135 | 1 |
| CAGAACTCGAAAGGC-1   | 1891002 | 60973  | 196657 | 170970  | 1462402   | 472  | 0.042655192  | 4.45832267  | 3.02222317  | 0.082737695 | 0.087376953 | 0 |
| CAGAACTCGGAATGG-1   | 1225462 | 11899  | 130654 | 104135  | 978774    | 316  | 0.028550801  | 3.031946667 | 3.04646852  | 0.112391241 | 0.111593102 | 0 |
| CAGAACTCTACGGGC-1   | 225986  | 71928  | 253339 | 199186  | 1747533   | 565  | 0.050911135  | 5.281755667 | 3.146310803 | 0.07902844  | 0.079290348 | 0 |
| CAGAGAGAGTGTACT-1   | 2252722 | 50537  | 245415 | 206056  | 1850714   | 598  | 0.053917879  | 5.5658389   | 3.001221634 | 0.08711482  | 0.084943267 | 0 |
| CAGAGAGGATGAAGAG-1  | 1478856 | 20427  | 158862 | 124942  | 1176255   | 380  | 0.034324704  | 3.608175967 | 3.10594051  | 0.101274798 | 0.100235971 | 0 |
| CAGAGAGGAGAGAGCT-1  | 1734744 | 28240  | 186143 | 1373603 | 1373603   | 444  | 0.040001568  | 4.185460733 | 3.13860261  | 0.090185855 | 0.090546004 | 0 |
| CAGAGAGTCCGAGGCC-1  | 1705046 | 63664  | 176436 | 154110  | 1310836   | 423  | 0.038231998  | 4.039648833 | 3.100305105 | 0.09371606  | 0.092919834 | 0 |
| CAGAGAGTCCGAGATT-1  | 1155904 | 42167  | 121931 | 94700   | 897106    | 290  | 0.038197245  | 2.703708733 | 3.234893534 | 0.109084548 | 0.109084548 | 0 |
| CAGATCAAGAGAGGTA-1  | 1734382 | 17335  | 186485 | 147320  | 1382842   | 447  | 0.026130267  | 2.716130267 | 2.981912861 | 0.09170147  | 0.091885929 | 0 |
| CAGATCAAGTCCGGA-1   | 1223384 | 68330  | 125705 | 102848  | 926501    | 299  | 0.026925257  | 2.851080033 | 3.038350931 | 0.116217307 | 0.114460693 | 1 |
| CAGATCAAGTCTCTCT-1  | 1248434 | 83796  | 265658 | 188404  | 1649576   | 533  | 0.048841561  | 4.9450041   | 3.033485854 | 0.090321128 | 0.090321128 | 0 |
| CAGCAAGGTTCAAGGG-1  | 1627262 | 22578  | 173280 | 140663  | 1289541   | 417  | 0.037623303  | 3.94749944  | 3.110804976 | 0.088387713 | 0.096416825 | 0 |
| CAGCAAGCTCCGAGCA-1  | 1666458 | 67209  | 172420 | 150578  | 1276251   | 412  | 0.037159283  | 3.8880215   | 3.257905883 | 0.124362349 | 0.123446837 | 1 |
| CAGCAAGCTCGAAGGC-1  | 1471326 | 29835  | 153922 | 127972  | 1159777   | 375  | 0.033795072  | 3.5558087   | 2.99610812  | 0.1005802   | 0.098032183 | 0 |
| CAGCAAGAGCGTCTCC-1  | 1967240 | 32020  | 211599 | 175080  | 1548541   | 500  | 0.045222155  | 4.707643133 | 3.020674515 | 0.089996748 | 0.088435788 | 0 |
| CAGCATAGAACGGGT-1   | 2404860 | 50224  | 257668 | 217096  | 1879872   | 607  | 0.054887542  | 5.659009167 | 3.031835643 | 0.080833971 | 0.079575122 | 0 |
| CAGCATACAGGAGTG-1   | 1409624 | 14844  | 153066 | 117269  | 1124445   | 363  | 0.0271796382 | 3.444442667 | 3.09794953  | 0.104061051 | 0.101565969 | 0 |
| CAGCATAGTCTCGAGT-1  | 203868  | 30808  | 217829 | 183230  | 1601791   | 517  | 0.046881942  | 4.846023567 | 3.122813748 | 0.098004641 | 0.087618766 | 0 |
| CAGCGAAGCGTCAAG-1   | 1362342 | 12211  | 142308 | 1086365 | 1321029   | 351  | 0.031720829  | 3.341885167 | 3.045185301 | 0.103428574 | 0.103428574 | 0 |
| CAGCGGACAGACCGAG-1  | 1934040 | 42893  | 208502 | 168865  | 1512780   | 489  | 0.044060794  | 4.592530967 | 3.254003441 | 0.114962202 | 0.114627548 | 1 |
| CAGCGGACGCGCTGTA-1  | 1779958 | 31732  | 188649 | 162297  | 1397280   | 451  | 0.040733308  | 4.2494217   | 3.096851647 | 0.09950021  | 0.089784253 | 0 |
| CAGCGGAGGCTCGGA-1   | 1834776 | 26808  | 162518 | 1447620 | 1447620   | 468  | 0.04207866   | 4.410497933 | 3.038100854 | 0.092488097 | 0.091444546 | 0 |
| CAGCTAATCACTCTG-1   | 1364382 | 34342  | 146702 | 127806  | 1055532   | 341  | 0.030690493  | 3.2488078   | 3.144119569 | 0.097905374 | 0.098244086 | 0 |
| CAGCTATGCGAAAGG-1   | 2131300 | 53370  | 225661 | 195038  | 1657341   | 535  | 0.048249805  | 5.022174367 | 3.036382367 | 0.086622451 | 0.085177327 | 0 |
| CAGCTGAGCACTCTG-1   | 1344510 | 9808   | 144109 | 119732  | 1070861   | 346  | 0.031148232  | 3.2741512   | 2.991271555 | 0.103786316 | 0.101454495 | 0 |
| CAGCTGGGTCTCTGGG-1  | 1598364 | 17058  | 172500 | 141194  | 1267812   | 436  | 0.037042855  | 3.8858174   | 3.022776503 | 0.0900390   | 0.090209113 | 0 |
| CAGCTGTGTCACGGTAT-1 | 2317042 | 32578  | 249417 | 191528  | 1843519   | 590  | 0.051706398  | 5.5315445   | 3.001349566 | 0.083494453 | 0.080282439 | 0 |
| CAGGTGTCAGAGTGTG-1  | 1211912 | 13658  | 131366 | 94811   | 972077    | 314  | 0.028363309  | 2.9803552   | 3.144247505 | 0.104912773 | 0.105203312 | 0 |
| CAGGTCTCTCAGGTTGA-1 | 1542410 | 15206  | 161765 | 132291  | 1229048</ |      |              |             |             |             |             |   |

|                    |         |        |        |         |            |      |              |             |              |             |             |   |
|--------------------|---------|--------|--------|---------|------------|------|--------------|-------------|--------------|-------------|-------------|---|
| CATCGAACATTCGTT-1  | 1689124 | 27548  | 184226 | 144439  | 134011     | 434  | 0.039102581  | 4.086088867 | 3.104121246  | 0.095348887 | 0.091467305 | 0 |
| CATCGAAGTCTCGAC-1  | 1639564 | 43619  | 172083 | 152945  | 1270917    | 411  | 0.036999962  | 3.8742428   | 3.095286114  | 0.094336494 | 0.094012531 | 0 |
| CATCGAAGTTGGGGC-1  | 1335302 | 48508  | 137663 | 1190909 | 1029222    | 332  | 0.029960412  | 5.0423551   | 3.065427668  | 0.105051972 | 0.105051972 | 0 |
| CATCGGGCAGCCAAAT-1 | 2032452 | 27036  | 223609 | 166025  | 1615782    | 522  | 0.047116435  | 4.8829961   | 3.097529434  | 0.089316046 | 0.085285175 | 0 |
| CATCGGGTCGATGT-1   | 1473728 | 69526  | 156549 | 119774  | 1127379    | 264  | 0.0321778375 | 3.440406367 | 3.044830132  | 0.101884967 | 0.100650497 | 0 |
| CATGACACCACTCGG-1  | 777788  | 71451  | 65515  | 565705  | 565705     | 183  | 0.01640252   | 1.762613333 | 3.046529691  | 0.137577003 | 0.132870605 | 0 |
| CATGAGAGTTACTCT-1  | 2172104 | 99810  | 225968 | 191806  | 1668520    | 536  | 0.048025304  | 4.939264933 | 3.189062078  | 0.097212671 | 0.095894562 | 1 |
| CATGACATCTCGGAG-1  | 156800  | 20516  | 166384 | 138106  | 1243584    | 402  | 0.036312134  | 3.811180633 | 3.0991957205 | 0.099159132 | 0.097825721 | 0 |
| CATGTCGTCGCAAC-1   | 1225014 | 34727  | 230667 | 202839  | 1750481    | 568  | 0.050945972  | 5.2705876   | 3.026424943  | 0.084344354 | 0.084433862 | 0 |
| CATGCGTCTACGGCC-1  | 1722280 | 35215  | 182601 | 164982  | 1339482    | 433  | 0.038976587  | 4.074889233 | 3.060549664  | 0.06649873  | 0.091045758 | 0 |
| CATGCTCTCATGTGAC-1 | 2072428 | 46502  | 229769 | 1620628 | 1047210641 | 524  | 0.047210641  | 4.9043615   | 3.130275138  | 0.084834643 | 0.084605473 | 0 |
| CATGGGAGATATGGT-1  | 1958860 | 19573  | 211885 | 158726  | 1568676    | 507  | 0.045845386  | 5.07480014  | 3.045589552  | 0.089383324 | 0.086786014 | 0 |
| CATGGCGGAGTCGG-1   | 797928  | 12642  | 84291  | 66710   | 634285     | 205  | 0.035994529  | 1.9882921   | 3.108729114  | 0.121005622 | 0.129136956 | 0 |
| CATGGCGGATTTGCG-1  | 555382  | 6119   | 57978  | 440606  | 50679      | 142  | 0.012879764  | 1.389392167 | 2.910910847  | 0.155277681 | 0.155279916 | 0 |
| CATGGGTCGAGCAAC-1  | 832524  | 22845  | 71074  | 73581   | 668224     | 234  | 0.019352581  | 2.070670133 | 3.134123828  | 0.124376726 | 0.127485053 | 0 |
| CATATCATGGGTGAAC-1 | 2578918 | 49940  | 227708 | 221505  | 2031165    | 616  | 0.059238997  | 6.088024067 | 3.047621754  | 0.079983391 | 0.079364727 | 0 |
| CATATCCAGAGCGCC-1  | 1041272 | 39354  | 107291 | 94142   | 800485     | 239  | 0.023389364  | 2.490006333 | 3.135348385  | 0.120549121 | 0.120193261 | 0 |
| CATATTCATAGGTCCT-1 | 4119828 | 157262 | 412876 | 362343  | 3187347    | 1030 | 0.091834417  | 9.090414267 | 3.177268076  | 0.085530783 | 0.085530783 | 1 |
| CATATCTGTAAGAAG-1  | 1289788 | 8519   | 111724 | 1034632 | 1034632    | 334  | 0.030267281  | 3.1899554   | 3.061892721  | 0.103756114 | 0.103756114 | 0 |
| CATTGCGAACAATA-1   | 2069318 | 94509  | 214843 | 179313  | 1580633    | 511  | 0.046019035  | 4.7839259   | 3.009198488  | 0.085612156 | 0.086127256 | 0 |
| CATTGCGCAGCGAGT-1  | 1498466 | 27556  | 158099 | 136232  | 1177549    | 280  | 0.034245828  | 3.5979809   | 3.004032417  | 0.104500202 | 0.099901286 | 0 |
| CCAAATCGGTAGCCCC-1 | 1518854 | 83271  | 131380 | 1149756 | 1149756    | 371  | 0.033475339  | 3.527451267 | 2.930275177  | 0.100931798 | 0.099227766 | 0 |
| CCAAATCTCCGAGGTG-1 | 1038100 | 16441  | 111213 | 806067  | 824779     | 266  | 0.023961547  | 2.5396019   | 3.087573053  | 0.121559224 | 0.117353885 | 1 |
| CCACCTAAGCTCTTCC-1 | 2333238 | 54287  | 247855 | 1817539 | 5488466    | 518  | 0.05291587   | 3.109407111 | 3.077965271  | 0.084021398 | 0.081204889 | 0 |
| CCACCTAAGTGGTAG-1  | 2819200 | 23751  | 314679 | 248923  | 2231667    | 721  | 0.060502307  | 6.6487738   | 3.021405077  | 0.079680554 | 0.078581152 | 0 |
| CCACCTAAGTTAGTGA-1 | 1533368 | 11662  | 168247 | 123262  | 1230197    | 397  | 0.035876555  | 3.761328533 | 3.04702682   | 0.102281183 | 0.100526589 | 1 |
| CCACCTAGTCCAGGCC-1 | 1443238 | 84463  | 129206 | 1082609 | 1082609    | 350  | 0.0331516396 | 3.3330021   | 2.907107033  | 0.104408303 | 0.104408303 | 0 |
| CCACGGAAGACTGTAA-1 | 1362894 | 15869  | 145102 | 108168  | 1093755    | 353  | 0.031715842  | 3.3277473   | 3.081269399  | 0.106512979 | 0.102926828 | 0 |
| CCACGGAGAGGTGGC-1  | 2764382 | 33997  | 303195 | 222935  | 2204055    | 712  | 0.064280665  | 6.584963223 | 4.235796405  | 0.147060795 | 0.147060795 | 1 |
| CCACGGACAGAGACC-1  | 2244778 | 60109  | 234007 | 1749993 | 1749993    | 565  | 0.050920427  | 5.266994    | 3.11915335   | 0.082592382 | 0.083585175 | 0 |
| CCACTACAGCAAGAAG-1 | 1303838 | 10658  | 142717 | 111056  | 1029367    | 336  | 0.030349435  | 3.203572967 | 3.079971586  | 0.102440786 | 0.103005118 | 0 |
| CCACTACAGACTACT-1  | 1957250 | 22063  | 164056 | 1555842 | 47124118   | 503  | 0.033191394  | 3.027965271 | 3.027965271  | 0.089037625 | 0.087139292 | 1 |
| CCACTACTCTACGGCG-1 | 1005072 | 64878  | 101137 | 87973   | 751084     | 243  | 0.021789397  | 2.323451367 | 3.056400133  | 0.116836241 | 0.118947753 | 0 |
| CCACTACTCTCGGAAT-1 | 2590632 | 36409  | 280649 | 223299  | 2050275    | 662  | 0.05977173   | 6.143301433 | 3.118657072  | 0.08065487  | 0.077971244 | 0 |
| CCAGGAGTCTACAGTG-1 | 1808628 | 14437  | 117828 | 862602  | 826202     | 279  | 0.025103448  | 2.639526633 | 2.983874518  | 0.11313881  | 0.112845636 | 0 |
| CCATGTCCTGAGTACT-1 | 2195948 | 60394  | 325538 | 189247  | 1713769    | 554  | 0.049952154  | 5.1725539   | 3.030984075  | 0.091623391 | 0.088923945 | 0 |
| CCATGTCCTCGGTGAT-1 | 1423912 | 19745  | 152485 | 125435  | 1126047    | 364  | 0.032807593  | 3.432056333 | 3.130747804  | 0.10012276  | 0.100492304 | 0 |
| CCATTCGAGTCTGGCC-1 | 2016674 | 54727  | 172425 | 1572080 | 1572080    | 508  | 0.045870466  | 4.762353567 | 3.02468706   | 0.091874845 | 0.088054897 | 0 |
| CCATCTGAGCAATAAG-1 | 1134864 | 12700  | 125307 | 91455   | 905402     | 292  | 0.02639447   | 2.785054534 | 3.106716476  | 0.111821729 | 0.111062171 | 0 |
| CCCAATCTGACCCAC-1  | 2185784 | 51776  | 222876 | 200972  | 1720160    | 516  | 0.049845776  | 5.167617067 | 2.955488455  | 0.084923902 | 0.084186368 | 0 |
| CCCAATTAGCAGCCTC-1 | 2071046 | 60665  | 216533 | 190897  | 1602351    | 518  | 0.046680255  | 4.856996933 | 3.174450159  | 0.089537421 | 0.086243707 | 0 |
| CCCATACAGCAGCTC-1  | 1188740 | 30847  | 126489 | 102521  | 928883     | 330  | 0.027002391  | 2.8564027   | 2.916234532  | 0.111025193 | 0.107253706 | 0 |
| CCCATACCAACGAAAT-1 | 1926286 | 33499  | 206859 | 1517433 | 1484955    | 400  | 0.044252309  | 4.596507033 | 2.917274627  | 0.090061067 | 0.087354741 | 0 |
| CCCATACAGAGAGTCT-1 | 1789668 | 116127 | 182162 | 151371  | 1340008    | 433  | 0.038954023  | 4.079265767 | 3.043398375  | 0.094062886 | 0.092869364 | 0 |
| CCCATACATCTCTTCA-1 | 1726126 | 78372  | 175896 | 155637  | 1316221    | 425  | 0.038309048  | 4.038893167 | 2.989254309  | 0.09121438  | 0.09198234  | 0 |
| CCCTCTAGCAATCTC-1  | 2956678 | 50191  | 315387 | 2339784 | 2339784    | 756  | 0.068251678  | 6.977899467 | 2.769408519  | 0.101589542 | 0.101589542 | 1 |
| CCCTCTCAGATCTCC-1  | 1609118 | 78850  | 162984 | 143542  | 1223742    | 395  | 0.035537397  | 3.718200133 | 3.017256845  | 0.102890529 | 0.098055735 | 0 |
| CCCTCTCTGATTGCG-1  | 1118800 | 39483  | 140956 | 861646  | 861646     | 278  | 0.025080974  | 2.654751067 | 3.034976004  | 0.117007329 | 0.113952885 | 0 |
| CCGGGATCCACTGT-1   | 1178264 | 13265  | 137914 | 105949  | 1021126    | 230  | 0.02978957   | 3.124733633 | 3.026300201  | 0.100552822 | 0.102965265 | 0 |
| CCGGTAGCGCAGTTT-1  | 1334556 | 58485  | 132447 | 109832  | 1033792    | 334  | 0.030072848  | 3.1621264   | 2.989823094  | 0.109399071 | 0.107345104 | 0 |
| CCGGTAGGCGCTATGT-1 | 446750  | 5912   | 42314  | 336054  | 336054     | 109  | 0.009727388  | 1.048926633 | 3.00515398   | 0.172792232 | 0.172792232 | 0 |
| CCGGAGGTGCTAGTAC-1 | 2180036 | 58397  | 225555 | 187195  | 1708889    | 552  | 0.049744978  | 5.1313449   | 3.002486431  | 0.087660932 | 0.086101791 | 0 |
| CCGGTAGTGCATGTGT-1 | 2292400 | 35433  | 239561 | 196162  | 1821254    | 588  | 0.053206001  | 5.503995867 | 3.030391374  | 0.082671635 | 0.086154192 | 0 |
| CCGGTAGTTCGCGATG-1 | 1351426 | 44332  | 137523 | 1056024 | 113547     | 341  | 0.030775482  | 3.237493267 | 3.109201951  | 0.103296274 | 0.101006173 | 0 |
| CGGTAGTGGCTTAT-1   | 1942124 | 36088  | 199129 | 166966  | 1539941    | 497  | 0.044926167  | 4.666113567 | 3.205143868  | 0.086423123 | 0.086425008 | 0 |
| CGGTACTTCGGAAGAT-1 | 1477252 | 19932  | 185489 | 155321  | 1386510    | 448  | 0.040537741  | 4.227180567 | 2.896149474  | 0.09213074  | 0.091112967 | 0 |
| CGTGGAGATAGATGT-1  | 1260720 | 26687  | 128976 | 101156  | 1003891    | 234  | 0.029157273  | 2.071701267 | 3.109597085  | 0.107421282 | 0.106555571 | 0 |
| CGTGGACCAACAGG-1   | 946662  | 9488   | 97337  | 83474   | 758563     | 245  | 0.022118144  | 2.355050607 | 3.13896721   | 0.116664631 | 0.114339434 | 0 |
| CGTGGACACTGGCCA-1  | 1445130 | 46353  | 144686 | 126682  | 1127789    | 364  | 0.032824053  | 3.464837833 | 2.988734515  | 0.101564215 | 0.09994302  | 0 |
| CGTGGAGATCAACCOC-1 | 1402124 | 15586  | 60323  | 57542   | 506673     | 164  | 0.014741518  | 1.58084833  | 3.042224621  | 0.145686066 | 0.147044507 | 0 |
| CGTGGTGAAGTCGGCT-1 | 2035446 | 23552  | 209026 | 181368  | 1621500    | 534  | 0.047267563  | 4.3917614   | 3.142383532  | 0.087905164 | 0.085787862 | 0 |
| CCTAAGGATACGTGTC-1 | 1243776 | 46411  | 128052 | 958967  | 958967     | 310  | 0.027888401  | 2.9471118   | 3.107868137  | 0.10849734  | 0.106254396 | 0 |
| CCTAAGGATCAAGCGC-1 | 1537612 | 16542  | 162673 | 142891  | 1215506    | 393  | 0.035457668  | 3.734648633 | 3.037834047  | 0.097823625 | 0.096876515 | 0 |
| CCTACAGAGGATGTC-1  | 484660  | 3365   | 53439  | 386317  | 31003511   | 125  | 0.012040433  | 3.029040493 | 3.029040493  | 0.164619597 | 0.165390755 | 0 |
| CCTACACCAACCGCTG-1 | 975884  | 18856  | 103875 | 86228   | 766925     | 248  | 0.02230506   | 2.3680561   | 2.987677294  | 0.122047018 | 0.119256821 | 0 |
| CCTACAGCTGAAGGG-1  | 1835666 | 14078  | 194920 | 156800  | 1469868    | 475  | 0.042932256  | 4.477480343 | 3.0814264    | 0.089731758 | 0.088296032 | 0 |
| CCTACACTGAGTGCAG-1 | 1593980 | 39518  | 166874 | 146887  | 1220511    | 391  | 0.033016055  | 3.693471067 | 3.130001952  | 0.098758539 | 0.096346185 | 0 |
| CCTACACTGTATCTTC-1 | 2175804 | 42149  | 231522 | 188271  | 1713662    | 554  | 0.048924044  | 5.146113633 | 3.22477641   | 0.084334647 | 0.084077862 | 0 |
| CCTACACTCTGAGTGT-1 | 963422  | 11643  | 105067 | 78705   | 767507     | 248  | 0.022393     | 2.379031914 | 2.984660616  | 0.116367635 | 0.115234527 | 0 |
| CCTACATCGGAGAGT-1  | 1835762 | 16302  | 161268 | 1460891 | 1460891    | 472  | 0.042682893  | 4.4362076   | 2.952258825  | 0.088615668 | 0.087058738 | 0 |
| CCTAGCTACTCCGTA-1  | 1056978 | 11035  | 113506 | 90980   | 844547     | 272  | 0.024568881  | 2.6031397   | 3.025838014  | 0.113415215 | 0.111208005 | 0 |
| CCTAGCTCTATGTAG-1  | 1888290 | 17077  | 204875 | 168666  | 1512472    | 489  | 0.044214768  | 4.597760067 | 3.046934716  | 0.087189949 | 0.086895116 | 0 |
| CCTAGCTTCTAATGSG-1 | 1040660 | 7911   | 112352 | 86255   | 834342     | 269  | 0.024321711  | 2.5681864   | 3.054034669  | 0.110805327 | 0.112811552 | 0 |
| CCTATTAAGCAACAG-1  | 1267868 | 15635  | 136738 | 109598  | 1          |      |              |             |              |             |             |   |

|                    |         |       |        |         |            |     |              |              |              |             |             |   |
|--------------------|---------|-------|--------|---------|------------|-----|--------------|--------------|--------------|-------------|-------------|---|
| CGAATTCAGTACCA-1   | 2148394 | 48823 | 228924 | 188575  | 1682072    | 543 | 0.048941204  | 5.080563433  | 3.009293535  | 0.080530416 | 0.080787058 | 0 |
| CGAACTTCGTGGATT-1  | 1519344 | 41931 | 162564 | 126803  | 1188046    | 384 | 0.0340916    | 3.63523733   | 3.143560173  | 0.07641207  | 0.095362412 | 0 |
| CGAATGTAGTAGCAG-1  | 1426342 | 32493 | 148871 | 127547  | 1117431    | 361 | 0.0346898    | 3.4168988    | 2.977258841  | 0.101805633 | 0.101805633 | 0 |
| CGAATGTACAGCATG-1  | 1338032 | 12233 | 146804 | 104602  | 1074393    | 347 | 0.031369086  | 3.295534567  | 3.140815167  | 0.106761605 | 0.103310249 | 0 |
| CGAATGGAGCCCATG-1  | 1145972 | 10785 | 124248 | 96891   | 912308     | 295 | 0.026599352  | 2.834320367  | 3.135653376  | 0.109629412 | 0.107721666 | 0 |
| CGAATGTGTGTCAACT-1 | 2357762 | 88055 | 245848 | 218626  | 1805233    | 583 | 0.052561526  | 5.426720667  | 3.076750382  | 0.086988275 | 0.082486644 | 0 |
| CGACCTTAGGTAACCT-1 | 1258488 | 20218 | 133529 | 112249  | 990442     | 321 | 0.028918691  | 3.051503733  | 3.1435137598 | 0.108113088 | 0.105988674 | 0 |
| CGACTTAGTGTGGTC-1  | 2188130 | 74852 | 227238 | 199900  | 1690450    | 546 | 0.04822356   | 5.1163558    | 3.045921811  | 0.083781398 | 0.084270308 | 0 |
| CGACCTTAGCTGGAA-1  | 1778448 | 13729 | 195386 | 155289  | 1414044    | 457 | 0.041206509  | 4.304715     | 2.959141053  | 0.089443342 | 0.088539087 | 0 |
| CGACTTCGTGGTGAA-1  | 1744136 | 17817 | 185550 | 154936  | 1385833    | 448 | 0.040444305  | 4.228205233  | 3.052149331  | 0.089511632 | 0.088980994 | 0 |
| CGAGAGCAAGCACTAC-1 | 2477078 | 40756 | 229209 | 1944293 | 1566719544 | 628 | 0.056719544  | 5.852171933  | 3.143746226  | 0.077793572 | 0.078285362 | 0 |
| CGAGAATCTCGAGAT-1  | 1016572 | 34507 | 108194 | 82513   | 791758     | 256 | 0.023128642  | 2.4440009    | 3.118367675  | 0.124355243 | 0.127883499 | 1 |
| CGAGACAGGCGATCT-1  | 2135970 | 51247 | 229803 | 172007  | 1698713    | 549 | 0.040497493  | 5.122752323  | 3.01060173   | 0.086084918 | 0.085664782 | 0 |
| CGAGACCAAGCATGGA-1 | 1678868 | 17816 | 175028 | 135181  | 1346063    | 435 | 0.03930458   | 4.3065903    | 3.308362396  | 0.120854351 | 0.121043797 | 1 |
| CGAGACCAAGCATCT-1  | 1889582 | 75681 | 196412 | 161726  | 1455763    | 470 | 0.045751788  | 4.371760367  | 2.914028371  | 0.094835681 | 0.092723852 | 0 |
| CGAGACCTGTGAGTAC-1 | 343464  | 9168  | 13198  | 26752   | 275946     | 89  | 0.008033105  | 0.8666299    | 2.968032407  | 0.189519131 | 0.191629913 | 0 |
| CGAGACTCAAGTGTG-1  | 1805596 | 38366 | 189155 | 167254  | 1410821    | 456 | 0.041085969  | 4.302346667  | 3.10889005   | 0.084895407 | 0.084895407 | 0 |
| CGAGACTCGGAAGAC-1  | 1926266 | 72299 | 193499 | 165750  | 1494718    | 483 | 0.043576107  | 4.544577533  | 3.043908121  | 0.087129884 | 0.089049136 | 0 |
| CGAGACTCTGTACAG-1  | 1800306 | 21160 | 161955 | 139213  | 1443978    | 466 | 0.040247767  | 4.283137952  | 2.883137952  | 0.089079906 | 0.089377631 | 0 |
| CGAGCAAGCTGGTCT-1  | 1951710 | 61554 | 205483 | 171413  | 1517260    | 490 | 0.044033118  | 4.5694558    | 2.991084495  | 0.095186119 | 0.094264226 | 0 |
| CGAGCAAGGCGATCT-1  | 2237266 | 65543 | 230560 | 195846  | 1745317    | 564 | 0.050231366  | 5.130895067  | 3.03029808   | 0.089572102 | 0.089707211 | 1 |
| CGAGCAAGCAAGACTA-1 | 1589222 | 41654 | 105668 | 145203  | 1236697    | 399 | 0.030502537  | 3.7864552    | 3.021389956  | 0.092591724 | 0.093825847 | 0 |
| CGAGCACAGCAGAGT-1  | 2070508 | 37207 | 220476 | 183209  | 1629616    | 526 | 0.047577055  | 4.931601733  | 3.191411967  | 0.083701966 | 0.083345154 | 0 |
| CGAGCACAGGACCAA-1  | 1804880 | 20873 | 189680 | 164570  | 1429757    | 462 | 0.041699948  | 4.358821633  | 2.986301165  | 0.088339018 | 0.0876796   | 0 |
| CGAGCACATGATGAA-1  | 1358980 | 14795 | 145889 | 112344  | 1085052    | 351 | 0.031617177  | 3.327787933  | 3.060361173  | 0.103306732 | 0.101395228 | 0 |
| CGATGGGTATCGTGC-1  | 1496770 | 64643 | 153810 | 128283  | 1150234    | 372 | 0.031419882  | 3.536942167  | 3.074611953  | 0.099123335 | 0.098112133 | 0 |
| CGATGGCTATCGGGG-1  | 2162090 | 41153 | 225029 | 179754  | 1736154    | 554 | 0.050008102  | 5.191420067  | 4.479400079  | 0.117620008 | 0.117620008 | 1 |
| CGATGGCTGACAACT-1  | 2559804 | 49842 | 267733 | 212367  | 2029862    | 656 | 0.05906069   | 6.0417001    | 3.518475332  | 0.128309497 | 0.125133469 | 1 |
| CGATGTAAGTCGGGT-1  | 2377726 | 29888 | 252704 | 204255  | 1880397    | 611 | 0.055216544  | 5.696744833  | 3.045966809  | 0.077632274 | 0.079135492 | 0 |
| CGATGTCAAGTACAA-1  | 1296938 | 16032 | 140285 | 103495  | 1034495    | 334 | 0.030006011  | 3.162167933  | 2.99752903   | 0.108042332 | 0.103193237 | 0 |
| CGATGTAGTCGCAAC-1  | 367326  | 3105  | 35119  | 31141   | 297961     | 96  | 0.008709302  | 0.943983233  | 3.049572577  | 0.180590162 | 0.18204443  | 0 |
| CGATGTATCTCCACT-1  | 561236  | 11227 | 59893  | 50085   | 440331     | 142 | 0.012860527  | 1.382120167  | 2.915619275  | 0.155885834 | 0.15330397  | 0 |
| CGATGTAGCTAGGCC-1  | 1698570 | 83075 | 172577 | 150416  | 1292502    | 418 | 0.037606004  | 3.952399167  | 3.141624336  | 0.094079555 | 0.094066148 | 0 |
| CGATGTGACCTTCAT-1  | 1961760 | 20872 | 211484 | 172691  | 1556713    | 503 | 0.045033996  | 4.71131784   | 2.918223668  | 0.087403401 | 0.088695461 | 0 |
| CGATTGATGAGAAGG-1  | 1363116 | 12149 | 146058 | 1091269 | 136403     | 353 | 0.030325584  | 3.360823     | 3.003032584  | 0.095656472 | 0.095656472 | 0 |
| CGATTGAGTACTCGG-1  | 1845060 | 24862 | 195973 | 168821  | 1455404    | 470 | 0.044772431  | 4.441960733  | 3.048004602  | 0.086656822 | 0.085607148 | 0 |
| CGATTGAGTATTCGA-1  | 1750214 | 56348 | 183494 | 151761  | 1358571    | 439 | 0.039559769  | 4.1530741    | 3.04420219   | 0.093576335 | 0.09260972  | 0 |
| CGATTGATCAACTCA-1  | 1480450 | 43704 | 157932 | 136270  | 1142544    | 369 | 0.033225904  | 3.3621054    | 3.03279783   | 0.105482754 | 0.098161774 | 0 |
| CGATTGAGTGATCTA-1  | 1754356 | 29993 | 186564 | 151898  | 1385861    | 448 | 0.04039558   | 4.220201733  | 3.034126178  | 0.092569803 | 0.090407596 | 0 |
| CGATTGATTGGGTC-1   | 1516144 | 83879 | 128771 | 1153118 | 1075778    | 372 | 0.033579     | 3.529186233  | 3.037356159  | 0.118217193 | 0.118217193 | 1 |
| CGATTGATGTGCTAA-1  | 1771556 | 12391 | 193230 | 145494  | 1419341    | 458 | 0.041400225  | 4.305628633  | 3.253799398  | 0.120424673 | 0.1180887   | 1 |
| CGCCAGAGGCTCAGA-1  | 1693462 | 13969 | 184756 | 146293  | 1348444    | 436 | 0.03937136   | 4.124164633  | 3.073836276  | 0.09362089  | 0.091428262 | 0 |
| CGCCAGAGGATGCTCT-1 | 2155770 | 72872 | 234828 | 1874563 | 1487014323 | 541 | 0.080489467  | 8.870143233  | 2.981287962  | 0.093428868 | 0.093165367 | 1 |
| CGCGGTAGTGGGAAGT-1 | 2052592 | 42452 | 214872 | 177329  | 1617939    | 523 | 0.04725868   | 4.9047119    | 3.109414632  | 0.085024731 | 0.081492845 | 0 |
| CGCGTTTTCAGGCTT-1  | 2137846 | 36807 | 233571 | 194298  | 1683120    | 544 | 0.049007556  | 5.3064282    | 3.139173632  | 0.080896741 | 0.080896741 | 0 |
| CGCGTTTGTGTAACCT-1 | 1216418 | 12688 | 105461 | 967827  | 916727     | 313 | 0.023238384  | 2.9822901    | 2.94057901   | 0.120874878 | 0.120874878 | 1 |
| CGCGTTTTCGTGATCA-1 | 2059390 | 67399 | 212103 | 181103  | 1598869    | 516 | 0.046534442  | 4.8442183    | 3.108150537  | 0.084128606 | 0.085803001 | 0 |
| CGCTATCAGGGATTA-1  | 1965940 | 30304 | 209092 | 166465  | 1559899    | 504 | 0.045550926  | 4.734718067  | 3.180456095  | 0.099664876 | 0.098100239 | 1 |
| CGCTATGCTATGTGCT-1 | 2032394 | 41042 | 212930 | 169523  | 1608799    | 520 | 0.046852392  | 4.854877167  | 2.999296174  | 0.08684798  | 0.084915248 | 0 |
| CGCTATCTCCGGTAGT-1 | 1670860 | 18484 | 179356 | 148689  | 1324331    | 428 | 0.038681771  | 4.048924167  | 3.169886913  | 0.094033051 | 0.092993347 | 0 |
| CGCTACTCTGACTTCC-1 | 2075130 | 65721 | 215389 | 1608375 | 1485945267 | 520 | 0.046779397  | 3.153732478  | 0.087208548  | 0.087311307 | 0.087311307 | 0 |
| CGCTTACAGACGGA-1   | 1475008 | 15596 | 156589 | 133370  | 1169453    | 378 | 0.034099746  | 3.5940663    | 3.045850438  | 0.097512513 | 0.095879095 | 0 |
| CGCTTACAGAAAGGT-1  | 2160344 | 21364 | 232354 | 187257  | 1719369    | 555 | 0.050203306  | 5.1996286    | 2.936367803  | 0.082835628 | 0.081670113 | 0 |
| CGCTTACTTTTATGTG-1 | 1125858 | 10442 | 123382 | 86312   | 905722     | 293 | 0.026464776  | 2.786333567  | 3.039223483  | 0.112076048 | 0.10828261  | 0 |
| CGGACACAGCAGCTTT-1 | 2279682 | 90829 | 237807 | 201293  | 1749753    | 565 | 0.0509207    | 5.282295633  | 3.181134002  | 0.084169152 | 0.082158428 | 0 |
| CGGACAGTAGTAGTA-1  | 1179800 | 13142 | 94287  | 941580  | 941580     | 304 | 0.0207461848 | 2.888907     | 2.984392973  | 0.104294226 | 0.106273974 | 0 |
| CGGACAGCTCAGGTTT-1 | 1425554 | 23793 | 154782 | 116280  | 1123069    | 365 | 0.03299077   | 3.464803123  | 3.107406909  | 0.097939558 | 0.098166887 | 0 |
| CGGACACTCAGTGTT-1  | 2539528 | 39105 | 276136 | 222285  | 2002402    | 647 | 0.058415071  | 6.00412277   | 2.996910489  | 0.076561324 | 0.077960211 | 0 |
| CGGAGGTGACTTCGTC-1 | 318906  | 34223 | 27581  | 254464  | 200742967  | 82  | 0.007429367  | 0.806369922  | 3.004047593  | 0.203046909 | 0.203046909 | 0 |
| CGGAGTCTCTGATT-1   | 2189420 | 72218 | 292330 | 176236  | 1705736    | 551 | 0.04955984   | 5.117037433  | 3.055680124  | 0.093311264 | 0.091171871 | 1 |
| CGGAGTAGGCTACGA-1  | 1415898 | 9461  | 162325 | 127461  | 1117041    | 361 | 0.032548156  | 3.440116033  | 3.071341831  | 0.101466785 | 0.098245839 | 0 |
| CGGAGTCTCCGGAAG-1  | 1349038 | 21643 | 119411 | 1057003 | 1030842733 | 341 | 0.030842733  | 3.1204127467 | 3.104127467  | 0.101141302 | 0.100333567 | 0 |
| CGGAGCTCTACAGAC-1  | 2244246 | 62228 | 249449 | 197465  | 1735104    | 580 | 0.050526125  | 5.2387993    | 3.108122505  | 0.081932821 | 0.079992158 | 0 |
| CGGAGTCAGAACTTA-1  | 1116420 | 24811 | 121079 | 103571  | 866959     | 260 | 0.02575752   | 2.6820006    | 3.065763034  | 0.111821554 | 0.111821554 | 0 |
| CGGAGTCAGATGGGA-1  | 2001692 | 53690 | 218702 | 172657  | 1556543    | 503 | 0.045239141  | 4.72417223   | 3.089395138  | 0.084180152 | 0.084710122 | 0 |
| CGGAGTCAGCCAGAG-1  | 1462388 | 23969 | 162942 | 126379  | 1150508    | 372 | 0.033402163  | 3.523158067  | 3.06412551   | 0.095297027 | 0.095686603 | 0 |
| CGGAGTCAGAGGACT-1  | 2891232 | 44068 | 254950 | 2279239 | 166509804  | 736 | 0.066387933  | 3.184105443  | 3.184105443  | 0.074475843 | 0.074475843 | 0 |
| CGGAGTCACTGTAT-1   | 3160210 | 32843 | 348492 | 266420  | 2512455    | 812 | 0.073218564  | 7.462112733  | 3.037301452  | 0.067936598 | 0.066710324 | 0 |
| CGGAGTGTATAGTGT-1  | 1544532 | 25173 | 174847 | 132777  | 1211765    | 393 | 0.03530745   | 3.7008477    | 3.089177631  | 0.093254624 | 0.092795813 | 0 |
| CGGAGTCTCTTCACT-1  | 1830202 | 14642 | 192569 | 169211  | 1433780    | 463 | 0.031811763  | 3.370977733  | 3.130430755  | 0.088543555 | 0.088543555 | 0 |
| CGGCTAGAGACGACA-1  | 1764988 | 23547 | 186281 | 162522  | 1392638    | 450 | 0.040598309  | 4.249622967  | 3.030355776  | 0.088675467 | 0.08776305  | 0 |
| CGGCTAGAGTACCGA-1  | 1733798 | 6645  | 186040 | 161369  | 1378844    | 445 | 0.040242073  | 4.217474567  | 3.073471446  | 0.093730481 | 0.091590733 | 0 |
| CGGCTAGAGTAGTAGT-1 | 1172664 | 12240 | 138067 | 97888   | 1024969    | 331 | 0.02992082   | 3.145150067  | 2.99776625   | 0.105874965 | 0.105755625 | 0 |
| CGGCTAGGTGTCAACT-1 | 2996998 | 67147 | 318    |         |            |     |              |              |              |             |             |   |

|                    |         |        |        |         |          |     |             |             |             |             |             |   |
|--------------------|---------|--------|--------|---------|----------|-----|-------------|-------------|-------------|-------------|-------------|---|
| CGTCAITAGATGA-1    | 856004  | 11200  | 86610  | 68826   | 68868    | 223 | 0.02007448  | 2.129878933 | 2.998870809 | 0.11940271  | 0.12147944  | 0 |
| CGTCATTCCACAC-1    | 2261368 | 58891  | 236159 | 191907  | 1774411  | 573 | 0.051684896 | 5.3540041   | 3.011403602 | 0.085501897 | 0.081899965 | 0 |
| CGTCTACCAACGACTT-1 | 1830266 | 37553  | 186456 | 160975  | 1425282  | 460 | 0.041455643 | 4.328347767 | 3.098777186 | 0.091330796 | 0.091093904 | 0 |
| CGTCTACCAAGACAC-1  | 1287382 | 20438  | 133208 | 108240  | 1025896  | 331 | 0.029991754 | 3.1611919   | 2.64142132  | 0.13897844  | 0.137894809 | 1 |
| CGTCTACCAACGCTG-1  | 1566836 | 50419  | 153256 | 137943  | 1225218  | 396 | 0.035689298 | 3.7490021   | 3.265388931 | 0.0959431   | 0.0959431   | 0 |
| CGTCTACGTTGAGCTA-1 | 1612578 | 48519  | 163870 | 141223  | 1258966  | 407 | 0.036718456 | 3.857782    | 3.099062319 | 0.09586239  | 0.094173526 | 0 |
| CGTCTACTCTAAAGG-1  | 1624382 | 57473  | 166136 | 142202  | 1258371  | 406 | 0.036640768 | 3.842845833 | 3.249960938 | 0.09563467  | 0.095563467 | 0 |
| CGTCTACGCTGAATGT-1 | 1474586 | 28227  | 147809 | 128549  | 1170001  | 378 | 0.034809169 | 3.5751218   | 3.02306425  | 0.099664807 | 0.099664807 | 0 |
| CGTGTAAAGTATGCG-1  | 1296870 | 32280  | 136722 | 106930  | 1040938  | 336 | 0.030340915 | 3.188387233 | 4.040387962 | 0.150169026 | 0.150169026 | 1 |
| CGTGTAAAGTAGTTTC-1 | 1200112 | 49514  | 104926 | 107762  | 937910   | 303 | 0.027271992 | 2.882236067 | 3.153406428 | 0.106159608 | 0.106159608 | 0 |
| CGTGTAAAGTTCCGAA-1 | 1080942 | 18652  | 103870 | 90994   | 855526   | 276 | 0.024903713 | 2.633148633 | 3.001398929 | 0.112206035 | 0.112228839 | 0 |
| CGTGTCTCAACGCTG-1  | 562062  | 14089  | 50039  | 49135   | 447799   | 145 | 0.013013182 | 1.398346867 | 3.007562041 | 0.151938899 | 0.146555128 | 0 |
| CGTGTCTCAAGCTAT-1  | 1029540 | 18698  | 94079  | 88603   | 938350   | 264 | 0.023802347 | 2.520560023 | 3.089156233 | 0.114906707 | 0.114612545 | 0 |
| CGTGTCTCATCCATC-1  | 1065860 | 185156 | 92685  | 94804   | 820215   | 265 | 0.023782541 | 2.526501767 | 3.107425869 | 0.113917663 | 0.114738243 | 0 |
| CGTGTCTCTCAACGAC-1 | 1304530 | 21459  | 122330 | 112239  | 1048502  | 339 | 0.030528301 | 3.212134233 | 2.888343654 | 0.103957743 | 0.102364398 | 0 |
| CGTGTCTCCGAGCTG-1  | 798556  | 22010  | 67223  | 69933   | 599390   | 194 | 0.017359875 | 1.862627067 | 3.125389712 | 0.130734206 | 0.125173532 | 0 |
| CGTGTCTCTGTGGA-1   | 1085352 | 11904  | 101242 | 93296   | 878710   | 284 | 0.025598769 | 2.711610467 | 3.099341329 | 0.113507578 | 0.111478881 | 0 |
| CGTGTCTCTGGGACC-1  | 1249184 | 32063  | 114553 | 112288  | 990180   | 320 | 0.028818333 | 3.051272033 | 2.971897704 | 0.111919887 | 0.112806338 | 1 |
| CGTTAGAAAGGATAC-1  | 1962970 | 34043  | 179821 | 1547250 | 14684067 | 500 | 0.040502531 | 4.668406767 | 3.110819067 | 0.08983162  | 0.08983162  | 0 |
| CGTTAGAAAGTGACAA-1 | 1747090 | 32014  | 183794 | 161003  | 1370279  | 443 | 0.0399684   | 4.187541567 | 3.047082892 | 0.088008513 | 0.085504199 | 0 |
| CGTTAGAGATCCACA-1  | 1829346 | 20179  | 191512 | 158661  | 1448054  | 468 | 0.042312736 | 4.419032323 | 3.140867082 | 0.088852733 | 0.087021225 | 0 |
| CGTTAGATGAGCTGG-1  | 1890494 | 22956  | 198496 | 167954  | 1501128  | 485 | 0.043797465 | 4.569540367 | 3.108940509 | 0.087506704 | 0.088208283 | 0 |
| CGTTTAGAGCTCGAA-1  | 1713214 | 22873  | 179651 | 147780  | 1362910  | 440 | 0.039729403 | 4.155215667 | 3.038428754 | 0.093552412 | 0.090640457 | 0 |
| CGTTTAGGCTACGCA-1  | 1593886 | 57906  | 161829 | 139414  | 1234737  | 399 | 0.035925359 | 3.7787633   | 3.060055261 | 0.096394508 | 0.095846518 | 0 |
| CGTTTGCTGGTACAA-1  | 1553610 | 15878  | 160343 | 135072  | 1237317  | 400 | 0.036092728 | 3.7966688   | 3.109311396 | 0.09686683  | 0.094360377 | 0 |
| CGTTTGCTCTATTGTT-1 | 1345264 | 23410  | 143852 | 108747  | 1069405  | 345 | 0.031138203 | 3.276483967 | 3.14158695  | 0.106424549 | 0.099191684 | 0 |
| CGTTGGAGGGCGCTCT-1 | 1660136 | 89504  | 159156 | 143097  | 1268759  | 410 | 0.036880549 | 3.866982733 | 3.143487185 | 0.095393577 | 0.095326369 | 0 |
| CGTTGGAGTCCACG-1   | 1886736 | 12994  | 198184 | 170367  | 1505391  | 486 | 0.043781336 | 4.577657933 | 3.025301325 | 0.089755476 | 0.086470881 | 0 |
| CTAACCTAGGATGGG-1  | 2280956 | 16866  | 235506 | 215612  | 1904972  | 615 | 0.055706023 | 5.7558358   | 3.156351468 | 0.077399607 | 0.076487869 | 0 |
| CTAACCTGTTCACGGA-1 | 1475372 | 36077  | 157947 | 1152440 | 128908   | 372 | 0.035596678 | 3.536459633 | 3.144316721 | 0.101393701 | 0.096497554 | 0 |
| CTAACCTTCTGGCCCT-1 | 2119528 | 91541  | 218779 | 190476  | 1618732  | 523 | 0.047067813 | 4.898148967 | 3.08417695  | 0.092322576 | 0.090279252 | 0 |
| CTAAGACGTATGTTCT-1 | 2081728 | 32821  | 243435 | 175754  | 1468308  | 533 | 0.048068205 | 4.977690467 | 3.109393362 | 0.086963097 | 0.086963097 | 0 |
| CTAATGGGAACCTGAT-1 | 1718314 | 17066  | 186825 | 142959  | 1371464  | 443 | 0.04003356  | 4.170205033 | 3.042408574 | 0.091785458 | 0.092584103 | 0 |
| CTACACCACTTACCA-1  | 1958388 | 60403  | 206718 | 167964  | 1523503  | 492 | 0.043454111 | 4.629236667 | 3.016740651 | 0.08899901  | 0.085584082 | 0 |
| CTACAGCTACGCTGCG-1 | 1555884 | 42826  | 162026 | 131686  | 1214266  | 392 | 0.031303895 | 3.707090933 | 3.118420411 | 0.09704807  | 0.096598519 | 0 |
| CTACATTCACAGATG-1  | 1003378 | 9074   | 109793 | 89999   | 800512   | 259 | 0.023417138 | 2.4778293   | 3.167332048 | 0.118303211 | 0.116576934 | 0 |
| CTACATTCAAGTGTG-1  | 1559394 | 18679  | 168518 | 138887  | 1233310  | 398 | 0.035985596 | 3.7766569   | 3.044849315 | 0.08820599  | 0.096442306 | 0 |
| CTACATTCTAGCTATG-1 | 1528406 | 9107   | 168006 | 126221  | 1225072  | 396 | 0.0357958   | 3.746199633 | 3.088261197 | 0.096831348 | 0.09699749  | 0 |
| CTACACAGATGGGTG-1  | 2157756 | 16509  | 234716 | 185599  | 1720992  | 556 | 0.050253513 | 5.1932489   | 3.052446621 | 0.085815507 | 0.083930582 | 0 |
| CTACACAGTAAACAT-1  | 2353070 | 36677  | 204540 | 209280  | 1852973  | 599 | 0.054960803 | 5.583048233 | 3.107911932 | 0.079946022 | 0.07912283  | 0 |
| CTACACGATATAGAG-1  | 1089474 | 9236   | 119348 | 86667   | 874323   | 282 | 0.025510375 | 2.687537233 | 3.073386936 | 0.110560528 | 0.110309541 | 0 |
| CTACAGCTGATGGGCA-1 | 1545156 | 55036  | 148526 | 137100  | 1204494  | 389 | 0.03509039  | 3.695667833 | 3.029249853 | 0.095477954 | 0.096567373 | 0 |
| CTAGAGTCTGACAACT-1 | 2030584 | 43885  | 213719 | 1597301 | 1465054  | 516 | 0.046050462 | 4.818978933 | 3.095566873 | 0.080478905 | 0.087801758 | 0 |
| CTAGCTTAGGATACAC-1 | 3113612 | 45134  | 229128 | 274740  | 2464410  | 796 | 0.071582578 | 7.2100598   | 3.064339202 | 0.076631034 | 0.075563579 | 0 |
| CTAGCTTCCAGCAT-1   | 1212136 | 32899  | 230296 | 186094  | 1671947  | 540 | 0.04879306  | 5.057347533 | 2.921123859 | 0.084012384 | 0.081305627 | 0 |
| CTAGCTTCTCCGGAG-1  | 1832240 | 19858  | 196106 | 159233  | 1457043  | 471 | 0.044848065 | 4.438456967 | 3.054795007 | 0.095222995 | 0.091995956 | 0 |
| CTAGCTTCTCTGATG-1  | 940292  | 12741  | 102392 | 78371   | 746688   | 241 | 0.02176956  | 2.317985367 | 2.968414204 | 0.124466028 | 0.12055896  | 0 |
| CTAGCTTCTTGCTCG-1  | 1383700 | 25384  | 146577 | 130856  | 1080903  | 349 | 0.031498144 | 3.3335749   | 3.145155567 | 0.088591508 | 0.101380616 | 0 |
| CTAGTGAAGTTTGGA-1  | 1906118 | 55236  | 199053 | 179562  | 1472267  | 476 | 0.040893913 | 4.458857567 | 3.01199828  | 0.086045215 | 0.086229583 | 0 |
| CTAGTGAGTAGGGTGT-1 | 1906060 | 29613  | 206076 | 170498  | 1554473  | 502 | 0.045458609 | 4.7179348   | 3.10617319  | 0.090680571 | 0.088180204 | 0 |
| CTAGTATCTTAAAGG-1  | 2560254 | 62047  | 268051 | 2019107 | 16086642 | 652 | 0.048886717 | 2.697471764 | 3.097471764 | 0.116611617 | 0.116611617 | 1 |
| CTACACCATAGCTCT-1  | 372056  | 2826   | 34877  | 28125   | 261228   | 84  | 0.007624999 | 0.826155533 | 3.06005389  | 0.195228871 | 0.199457096 | 0 |
| CTCACACGCTCTCTG-1  | 1495918 | 20166  | 160517 | 128269  | 1186366  | 383 | 0.034656715 | 3.644884433 | 3.036166897 | 0.094412411 | 0.09487573  | 0 |
| CTCACATCAAGAGGC-1  | 2071306 | 54424  | 219228 | 1615113 | 1825413  | 522 | 0.04076732  | 4.891227633 | 3.034239034 | 0.08313121  | 0.084712562 | 0 |
| CTCAGAACTGAGAC-1   | 1688192 | 65014  | 176089 | 153020  | 1294469  | 518 | 0.03767659  | 3.956617167 | 3.096021597 | 0.091829391 | 0.093110915 | 0 |
| CTCAGATCATGACCA-1  | 2000786 | 51382  | 212940 | 1560239 | 1762259  | 404 | 0.04536542  | 4.7227471   | 3.011010478 | 0.086531912 | 0.086531912 | 0 |
| CTCATAGTGTTCGG-1   | 2253389 | 20534  | 241162 | 208554  | 1782358  | 576 | 0.052034523 | 5.4071209   | 3.2085284   | 0.082426564 | 0.083867434 | 0 |
| CTCATATCATTGGAC-1  | 1463202 | 35485  | 145228 | 131485  | 1151004  | 372 | 0.033488303 | 3.5243579   | 3.019333348 | 0.104325116 | 0.103806784 | 1 |
| CTCATATCTGATGAG-1  | 1001058 | 11591  | 160293 | 133403  | 1195771  | 386 | 0.0349011   | 3.653897233 | 2.758148853 | 0.093801825 | 0.093801825 | 0 |
| CTCTAGAGGAGTACC-1  | 2763282 | 28714  | 299137 | 250751  | 2184680  | 702 | 0.061662812 | 6.5240663   | 3.035823885 | 0.078653034 | 0.076497298 | 0 |
| CTCTAGGACCAACGAG-1 | 1563740 | 15633  | 166675 | 136642  | 1244880  | 406 | 0.036289342 | 3.811587767 | 3.06562662  | 0.097550723 | 0.095756039 | 0 |
| CTGMAAAGAGGCTCA-1  | 2285172 | 54679  | 236444 | 201940  | 1791909  | 579 | 0.052162523 | 5.3902435   | 3.064757859 | 0.085205805 | 0.085943593 | 0 |
| CTGMAAAGACTACT-1   | 1975938 | 47327  | 211690 | 179274  | 1537647  | 497 | 0.044849458 | 4.675464833 | 3.035504482 | 0.085418231 | 0.085903952 | 0 |
| CTGMAAATTTTGTTGG-1 | 1883110 | 20931  | 174127 | 1249333 | 1049333  | 404 | 0.03638018  | 3.817489667 | 3.175836429 | 0.09546106  | 0.09668208  | 0 |
| CTGMAATCTAAGAG-1   | 2285529 | 55556  | 244776 | 203887  | 1784309  | 577 | 0.051973004 | 5.380289233 | 3.104762055 | 0.078236923 | 0.079604233 | 0 |
| CTGAGAGGCGATATA-1  | 1127428 | 11930  | 120783 | 92320   | 902395   | 292 | 0.026336249 | 2.7811031   | 3.168086677 | 0.110343678 | 0.107689797 | 0 |
| CTGAGAGGTGACATA-1  | 1458004 | 15001  | 158857 | 123205  | 1156541  | 374 | 0.033745701 | 3.546709667 | 3.088834096 | 0.101246607 | 0.101649343 | 0 |
| CTGAGGCACTAGTCT-1  | 1256054 | 17485  | 137605 | 103900  | 999774   | 322 | 0.029113872 | 3.065194367 | 3.007549019 | 0.103258312 | 0.099868202 | 0 |
| CTGAGGCGAGATACA-1  | 1937566 | 73487  | 197937 | 170916  | 1474826  | 476 | 0.042934146 | 4.477838733 | 3.036442315 | 0.088850377 | 0.088620471 | 0 |
| CTGAGGCGAAGTGTCT-1 | 2530396 | 83816  | 263584 | 222531  | 1960465  | 633 | 0.056914471 | 5.841298967 | 3.110339046 | 0.08043918  | 0.079721384 | 0 |
| CTGAGGGGTACTGTG-1  | 1208110 | 12446  | 128280 | 94804   | 979380   | 334 | 0.028419392 | 2.9924117   | 3.052217393 | 0.108598181 | 0.107906999 | 0 |
| CTGAGGAGAGCAATT-1  | 1380234 | 42952  | 146410 | 113540  | 1077332  | 348 | 0.031410026 | 3.3200091   | 3.079942893 | 0.101831668 | 0.102480522 | 0 |
| CTGGAAGGCTACACA-1  | 1148382 | 16213  | 123609 | 97643   | 930917   | 294 | 0.028510568 | 2.8047236   | 2.976380472 | 0.107621346 | 0.105181703 | 0 |
| CTGGAAGTCACTAAG-1  | 1127786 | 10427  | 124394 | 91174   | 901791   | 291 | 0.026230658 | 2.763890367 | 3.028395938 | 0.108325242 |             |   |

|                    |         |        |         |         |         |     |              |              |              |             |             |   |
|--------------------|---------|--------|---------|---------|---------|-----|--------------|--------------|--------------|-------------|-------------|---|
| CTGAAGTGTAAAGGCA-1 | 1902978 | 72754  | 199621  | 165034  | 1465569 | 473 | 0.042662696  | 4.45242533   | 3.081537379  | 0.088519466 | 0.089200565 | 0 |
| CTGAAGTGTAAACGCG-1 | 1320288 | 38113  | 138178  | 120671  | 1023326 | 331 | 0.029790664  | 3.146362267  | 2.984300666  | 3.106707634 | 0.105070744 | 0 |
| CTGAAGTGTCCACAG-1  | 1428234 | 13240  | 156141  | 122660  | 1136293 | 367 | 0.033943067  | 3.473943067  | 3.17162239   | 0.301202051 | 0.099015825 | 0 |
| CTGAAGTGTGAGGCG-1  | 1367116 | 24192  | 1421288 | 126217  | 1075419 | 347 | 0.031325224  | 3.317367933  | 3.088183083  | 0.102826412 | 0.102826412 | 0 |
| CTGATAGAGCAGCGTA-1 | 1381584 | 14862  | 124325  | 109446  | 928951  | 303 | 0.027436522  | 2.9014909    | 3.134874869  | 0.106246545 | 0.104990891 | 0 |
| CTGATAGAGCTACTA-1  | 1553248 | 14719  | 137488  | 1235816 | 1275473 | 399 | 3.7733072    | 2.9959209241 | 2.9959209241 | 0.092426373 | 0.092474369 | 0 |
| CTGATAGTCAAGAAC-1  | 1537362 | 38305  | 161344  | 145742  | 1192171 | 385 | 0.0384774663 | 3.652282733  | 3.058908771  | 0.101834517 | 0.095929179 | 0 |
| CTGATCCGTCGCTCA-1  | 1696836 | 15592  | 181047  | 135122  | 1346085 | 435 | 4.1021824    | 3.000875121  | 3.000875121  | 0.095379332 | 0.095379332 | 0 |
| CTGCGTAGTGCTAG-1   | 1938248 | 12978  | 206739  | 181199  | 1537332 | 497 | 0.044861043  | 4.680403867  | 3.11474676   | 0.089646995 | 0.088526282 | 0 |
| CTGCGTAGTCCACAA-1  | 1123532 | 10719  | 145021  | 113899  | 1052983 | 340 | 0.030751861  | 3.1241486    | 2.771150322  | 0.101382131 | 0.101633732 | 0 |
| CTGCGTACTGAGCGG-1  | 1402058 | 17933  | 145451  | 131879  | 1106795 | 358 | 0.032211239  | 3.391182033  | 3.045507493  | 0.101491384 | 0.101491384 | 0 |
| CTGCGGAAGAGTGACC-1 | 2253888 | 39985  | 228552  | 206359  | 1778992 | 575 | 0.051873029  | 5.364512233  | 3.195462491  | 0.082609261 | 0.081208457 | 0 |
| CTCGGGAGATGCTCT-1  | 2097292 | 42793  | 212585  | 188266  | 1651748 | 534 | 0.04812277   | 4.988983423  | 3.142117834  | 0.082486677 | 0.082363929 | 0 |
| CTCGGGAGTGTGTGT-1  | 1437632 | 35351  | 140076  | 127987  | 1134218 | 366 | 0.033089927  | 3.482450223  | 2.971983325  | 0.102500698 | 0.100634521 | 0 |
| CTCGGGAGTCTCCACT-1 | 2302124 | 43820  | 242140  | 213695  | 1802469 | 582 | 0.052483142  | 5.415455567  | 3.144484962  | 0.085789383 | 0.084882361 | 0 |
| CTCGGATGCAAGAAC-1  | 1794346 | 50036  | 187028  | 164039  | 1393243 | 540 | 0.04634764   | 4.257308267  | 2.913233999  | 0.090116101 | 0.090116101 | 0 |
| CTCGGATCCAAAGAA-1  | 1294600 | 23917  | 137384  | 112916  | 1020383 | 330 | 0.029718838  | 3.1313968    | 3.083663612  | 0.109444621 | 0.104363896 | 0 |
| CTCGGATGCCAAGAT-1  | 2037080 | 11364  | 217101  | 176835  | 1611780 | 521 | 0.047007967  | 4.860889233  | 3.050676612  | 0.084493999 | 0.084115103 | 0 |
| CTCGTGTAGTAGGCGA-1 | 2904584 | 46632  | 307361  | 229341  | 207550  | 6   | 0.0660233    | 3.04479817   | 0.070948185  | 0.070948185 | 0.070948185 | 0 |
| CTCGTGTAGTCTGGC-1  | 1587634 | 46644  | 166037  | 143424  | 1231529 | 398 | 0.035867426  | 3.781468433  | 3.016763269  | 0.095951563 | 0.095778388 | 0 |
| CTCGTGTCAATAAG-1   | 999508  | 8249   | 108803  | 78217   | 803639  | 260 | 0.023518168  | 2.480268267  | 3.01775837   | 0.115024391 | 0.113822096 | 0 |
| CTGGCTAGCGATATA-1  | 1369272 | 12013  | 147479  | 1097852 | 111928  | 355 | 0.0320925    | 3.360740733  | 2.985688307  | 0.104341385 | 0.103164377 | 0 |
| CTGGTCTAGCTGGAT-1  | 2144268 | 25502  | 228582  | 180198  | 1709986 | 552 | 0.049937113  | 5.168721     | 2.936170364  | 0.085501076 | 0.083118416 | 0 |
| CTGGTCTCTCATTT-1   | 2404226 | 73879  | 214536  | 164843  | 1589968 | 514 | 0.046236042  | 4.782915867  | 3.22314678   | 0.120136368 | 0.120136368 | 1 |
| CTGGTCTCTCTTAG-1   | 1760714 | 10573  | 189650  | 145661  | 1414480 | 457 | 0.041297216  | 4.306031767  | 2.827139368  | 0.090564736 | 0.088004571 | 0 |
| CTGTGTCAATGGGAC-1  | 1792334 | 95480  | 181386  | 157408  | 1368000 | 442 | 0.039808665  | 4.174099133  | 3.045392853  | 0.092743721 | 0.091281284 | 0 |
| CTGTGTCTAGACAGGA-1 | 1560768 | 12728  | 167697  | 138184  | 1242159 | 401 | 0.03619035   | 3.810208408  | 3.00028408   | 0.09695105  | 0.093401483 | 0 |
| CTGTGTCTATGCTGT-1  | 1031146 | 31848  | 103607  | 95999   | 800092  | 258 | 0.02121614   | 2.4718329    | 3.014880213  | 0.115128148 | 0.11494355  | 0 |
| CTGTGTGTGGCGCT-1   | 1782228 | 35880  | 185357  | 162055  | 1297086 | 451 | 0.040753745  | 4.260288423  | 3.00588955   | 0.092581503 | 0.089405956 | 0 |
| CTGTTTAAGATCTGG-1  | 2009608 | 17905  | 213162  | 174729  | 1601112 | 517 | 0.046778974  | 4.8758432    | 3.088770973  | 0.082092232 | 0.08255897  | 0 |
| CTGTTTAAGTGGCCCA-1 | 1733476 | 40875  | 181142  | 158801  | 1352558 | 437 | 0.038452659  | 4.1385567    | 3.141178428  | 0.093901957 | 0.093999334 | 0 |
| CTGTTTAAGGCTACT-1  | 2121484 | 53041  | 233677  | 1733493 | 1733493 | 560 | 5.187961733  | 3.109608866  | 3.091706718  | 0.087791857 | 0.087791857 | 0 |
| CTGTTAACGCGCTGTA-1 | 1466792 | 16859  | 157859  | 129248  | 1162326 | 376 | 0.033941439  | 3.567886333  | 3.038904473  | 0.099649224 | 0.097774295 | 0 |
| CTGTTAGTCTCTTTA-1  | 1054114 | 14082  | 112038  | 93653   | 835341  | 270 | 0.024443221  | 2.586924333  | 2.917447086  | 0.101001054 | 0.110018126 | 0 |
| CTGTTATACACAGCG-1  | 600228  | 27944  | 61771   | 456486  | 456486  | 147 | 0.03118986   | 1.413452167  | 2.944188613  | 0.147719573 | 0.143495214 | 0 |
| CTTAACTAGACTCTTG-1 | 797650  | 8617   | 86789   | 67259   | 634985  | 205 | 0.018538829  | 1.971474667  | 2.983131688  | 0.125362199 | 0.125749205 | 0 |
| CTTAACTGTGGAAAGA-1 | 1335630 | 21708  | 141310  | 117150  | 1055462 | 341 | 0.030852233  | 3.25824967   | 3.072816301  | 0.100825335 | 0.101091223 | 0 |
| CTTAACTCTCTTGAC-1  | 2206996 | 52103  | 237378  | 194151  | 1723364 | 557 | 0.050212775  | 5.2020779    | 2.9041998    | 0.089750691 | 0.089750691 | 0 |
| CTTACGAGGGGCTCTC-1 | 2357294 | 65991  | 245239  | 214025  | 1832039 | 592 | 0.053131553  | 5.514132167  | 2.895250667  | 0.083993979 | 0.083993979 | 0 |
| CTTACGGTAAGTAAC-1  | 2149550 | 18786  | 229488  | 194908  | 1706374 | 551 | 0.049816621  | 5.164468867  | 3.119499893  | 0.081608867 | 0.081173409 | 0 |
| CTTACGGTCACTGG-1   | 1495446 | 16363  | 158509  | 133671  | 1188303 | 384 | 0.034705698  | 3.647437767  | 3.163026682  | 0.096466298 | 0.094218776 | 0 |
| CTTACGGTGCTATTG-1  | 1344662 | 12942  | 145731  | 100768  | 1079221 | 349 | 0.031485573  | 3.3107972    | 3.100494374  | 0.100402231 | 0.098392658 | 0 |
| CTTACGCTGACAGTA-1  | 1179048 | 9884   | 97632   | 94937   | 827516  | 305 | 0.02715661   | 2.897565533  | 3.085791989  | 0.108786155 | 0.109168089 | 0 |
| CTTACGCTCCGAGCA-1  | 1663906 | 45922  | 172190  | 152250  | 1293544 | 418 | 0.03765714   | 3.9596711    | 3.097094008  | 0.09157913  | 0.091586337 | 0 |
| CTTAGAGACAGGAGCA-1 | 2162364 | 39880  | 227760  | 194897  | 1702627 | 550 | 0.040644444  | 5.156894133  | 3.046575523  | 0.082369825 | 0.084887742 | 0 |
| CTTAGAGCTGGGCTG-1  | 1481830 | 14948  | 133838  | 1162864 | 1162864 | 376 | 0.031888596  | 3.569404567  | 3.119705053  | 0.099946647 | 0.10084129  | 0 |
| CTTCTACTGGCGCCA-1  | 2289280 | 53969  | 245452  | 209231  | 1784628 | 576 | 0.0502005103 | 5.3963407    | 3.107273787  | 0.079286156 | 0.079198073 | 0 |
| CTTCTACTGCTGGAT-1  | 2191864 | 22693  | 253133  | 188443  | 1745095 | 564 | 0.050928455  | 5.2703951    | 3.105562629  | 0.086090949 | 0.082589925 | 0 |
| CTTCTCTAATAGTA-1   | 976130  | 8538   | 105744  | 82690   | 779558  | 252 | 0.022754777  | 2.425797233  | 3.001966771  | 0.118342659 | 0.115189579 | 0 |
| CTTCTCTCAGCTATGT-1 | 1263638 | 15403  | 138880  | 100888  | 1008776 | 326 | 0.02648899   | 3.0966291    | 3.109267651  | 0.108412539 | 0.105191628 | 0 |
| CTTCTCTACTGGATA-1  | 1557172 | 17041  | 131029  | 1242964 | 1242964 | 402 | 0.0386271866 | 3.781465633  | 2.967222546  | 0.09790768  | 0.095682529 | 0 |
| CTTCTCTCTCTAGAG-1  | 1290368 | 9979   | 136683  | 100188  | 1003518 | 324 | 0.029300541  | 3.075087533  | 3.00312322   | 0.106112775 | 0.10521838  | 0 |
| CTTGGTAGACAGAGA-1  | 1600858 | 15526  | 172364  | 133920  | 1277048 | 413 | 0.037331676  | 3.913358767  | 3.060517606  | 0.09430851  | 0.0937657   | 0 |
| CTTGGTAGCGGCTTG-1  | 1253804 | 6889   | 142183  | 107036  | 997496  | 322 | 0.07813841   | 3.071516348  | 3.020109166  | 0.100191306 | 0.100191306 | 0 |
| CTTGGTAGTCTCTGA-1  | 1046986 | 11947  | 130730  | 96485   | 827824  | 267 | 0.024145741  | 2.5531081    | 3.00358703   | 0.113264749 | 0.111579134 | 0 |
| CTTGGTGTCTATGTG-1  | 1188350 | 12674  | 129704  | 93400   | 944732  | 305 | 0.027542008  | 2.896158567  | 3.056774008  | 0.108621867 | 0.106120356 | 0 |
| CTTGGGGTCAAGGCG-1  | 1088326 | 35869  | 130874  | 96164   | 825919  | 267 | 0.023993983  | 2.557689423  | 3.114020182  | 0.112342159 | 0.112121605 | 0 |
| CTTGGTCTCTGAGTC-1  | 1471636 | 29145  | 152586  | 124223  | 1165082 | 377 | 0.033927155  | 3.551343533  | 3.018356376  | 0.100971226 | 0.095816367 | 0 |
| GAACACTGTGGGAAGA-1 | 1571848 | 82219  | 137717  | 1189792 | 137717  | 384 | 3.6423193    | 3.094240726  | 0.097142868  | 0.098054525 | 0.098054525 | 0 |
| GAACACTGCTGCTCAA-1 | 2135930 | 27021  | 230601  | 190929  | 1687379 | 545 | 0.049259709  | 5.110496567  | 2.979772072  | 0.084960479 | 0.083211653 | 0 |
| GAACACTCTACGCTCT-1 | 2130534 | 106771 | 218451  | 192550  | 1612762 | 521 | 0.046673393  | 4.812697433  | 3.003518599  | 0.08935311  | 0.087046346 | 0 |
| GAACACTCTACGATGT-1 | 1542980 | 11913  | 170467  | 1236415 | 1236415 | 396 | 0.03181356   | 3.741242833  | 3.042750401  | 0.094517746 | 0.091273184 | 0 |
| GAACACTCTGTGGAT-1  | 2495682 | 28178  | 275288  | 218631  | 197363  | 638 | 0.05765117   | 5.92616243   | 2.976115759  | 0.08108975  | 0.077453221 | 0 |
| GAATAAGAGGCTCTA-1  | 1624258 | 36011  | 176005  | 140795  | 1270956 | 411 | 0.057095872  | 3.8867127    | 3.072867677  | 0.097114455 | 0.094399575 | 0 |
| GAATAGACCTCCTCA-1  | 3052308 | 50683  | 231744  | 262350  | 2407421 | 778 | 0.070268292  | 7.15647123   | 3.071299204  | 0.071206171 | 0.070161625 | 0 |
| GAACATCATCTTGA-1   | 1716578 | 80359  | 177834  | 155279  | 1302906 | 426 | 0.03790936   | 3.972400433  | 3.050301511  | 0.100404892 | 0.0917392   | 0 |
| GAACATCATGCGCGG-1  | 913684  | 74014  | 89652   | 688906  | 688906  | 211 | 0.019455263  | 2.085101733  | 3.001404977  | 0.126304485 | 0.126304485 | 0 |
| GAACATCAAGGAGTA-1  | 1874472 | 15467  | 200866  | 163088  | 1489051 | 481 | 0.043479318  | 4.5191123    | 3.029858487  | 0.090336444 | 0.08918915  | 0 |
| GAACATCAATGCGGC-1  | 1155100 | 23774  | 119606  | 115712  | 896218  | 290 | 0.036104245  | 2.764227367  | 3.111349462  | 0.111685547 | 0.110842181 | 0 |
| GAACATGATCACTGT-1  | 1320126 | 16512  | 148517  | 105155  | 105152  | 340 | 0.03074443   | 3.228522067  | 3.032847182  | 0.100310102 | 0.099074915 | 0 |
| GAACATGATGAGTAG-1  | 1478760 | 18729  | 156095  | 123110  | 1180826 | 381 | 0.034519334  | 3.624958133  | 3.028026203  | 0.096022323 | 0.096465549 | 0 |
| GAACATGATCAAGCC-1  | 1327568 | 54281  | 138490  | 117847  | 1016950 | 329 | 0.029541528  | 3.1145524    | 3.011322792  | 0.10361213  | 0.101654045 | 0 |
| GAACGAGATCTTGA-1   | 1806992 | 20850  | 198891  | 154785  | 1432466 | 463 | 0.041755683  | 4.359882333  | 3.072373375  | 0.087650894 | 0.087276321 | 0 |
| GAACGAGAGGCTGCG-1  | 2242342 | 43803  | 243718  | 180991  | 1773830 | 573 | 0.051648559  | 5.356440633  | 3.324063411  | 0.          |             |   |

|                     |         |        |        |         |         |     |             |             |             |             |             |   |
|---------------------|---------|--------|--------|---------|---------|-----|-------------|-------------|-------------|-------------|-------------|---|
| GACCTGGGTAGCCCTG-1  | 1507576 | 30056  | 160550 | 130904  | 1186066 | 383 | 0.03461075  | 3.6470282   | 3.064087919 | 0.095999814 | 0.097439951 | 0 |
| GACCGGTAGTAACCT-1   | 1134348 | 56235  | 124120 | 116042  | 1017851 | 329 | 0.029634674 | 3.1338713   | 3.066245721 | 0.102695246 | 0.102695246 | 0 |
| GACGGGTAGGTGAAG-1   | 1034420 | 31407  | 91650  | 87949   | 803414  | 260 | 0.023429188 | 2.491088867 | 3.093265831 | 0.115963439 | 0.115968985 | 0 |
| GACGGCTGTGTAAGA-1   | 1000748 | 18661  | 109270 | 79280   | 793537  | 256 | 0.023098136 | 2.444537467 | 2.966153212 | 0.117263896 | 0.114776129 | 0 |
| GACGGCTGTGTGAGG-1   | 1885472 | 49025  | 202240 | 166556  | 1467051 | 474 | 0.042808146 | 4.4097851   | 3.084720841 | 0.090262068 | 0.089157872 | 0 |
| GACGTGTGCTGCTAC-1   | 1450280 | 16277  | 143118 | 113494  | 1138441 | 374 | 0.031737767 | 3.545438667 | 3.047979941 | 0.097451603 | 0.097451603 | 0 |
| GACTACCAACCCGTGA-1  | 1395092 | 23880  | 152241 | 122273  | 1096698 | 354 | 0.031977537 | 3.371270333 | 2.984218302 | 0.099639901 | 0.099127411 | 0 |
| GACTACACAGACAG-1    | 1446066 | 22168  | 160403 | 123529  | 1139966 | 368 | 0.031261087 | 3.496100967 | 2.878661126 | 0.100431411 | 0.099138281 | 0 |
| GACTACAGCAATAC-1    | 2660244 | 39481  | 289705 | 248051  | 2083007 | 673 | 0.060716604 | 6.2424344   | 3.18591201  | 0.076568997 | 0.076522248 | 0 |
| GACTCGCAGTAGGGGT-1  | 2170000 | 36102  | 235259 | 189000  | 1712739 | 553 | 0.050026079 | 5.181187    | 3.050870452 | 0.083284338 | 0.081284338 | 0 |
| GACTCGGGGTGTCTGA-1  | 1636638 | 16369  | 139524 | 178566  | 1301159 | 420 | 0.037953245 | 3.9728971   | 3.051660464 | 0.093585147 | 0.091834371 | 0 |
| GACTCGGTATCATCT-1   | 2264826 | 25519  | 242691 | 199311  | 1797305 | 581 | 0.052105801 | 5.362400993 | 3.070489777 | 0.083592465 | 0.083280216 | 0 |
| GACTCGCTGTAGCGC-1   | 670838  | 9237   | 60215  | 60752   | 540734  | 175 | 0.01573814  | 1.651431767 | 2.993369302 | 0.143122385 | 0.140546077 | 0 |
| GAGGAGAGAGTAICTA-1  | 2216978 | 48046  | 239225 | 188015  | 1741692 | 563 | 0.050811488 | 5.266044067 | 3.084475707 | 0.085787459 | 0.0840052   | 0 |
| GAGAGAGATGTATGCG-1  | 2176508 | 36693  | 235012 | 197154  | 1707699 | 552 | 0.037929883 | 5.155134933 | 3.050103675 | 0.087779692 | 0.08663753  | 0 |
| GAGAGAGTCCCTAT-1    | 1711856 | 2202   | 188377 | 151855  | 1349602 | 436 | 0.039351329 | 4.051451767 | 3.068046202 | 0.093719704 | 0.09198494  | 0 |
| GAGGTGAGCGCGAACA-1  | 2121278 | 69618  | 223005 | 190890  | 1637765 | 529 | 0.04768697  | 4.964064667 | 3.031619992 | 0.084417538 | 0.08385759  | 0 |
| GAGGTGACACTACTTG-1  | 1099550 | 30858  | 113973 | 87748   | 826971  | 267 | 0.024081367 | 2.558490233 | 2.96361519  | 0.110404944 | 0.112755599 | 0 |
| GAGGTGACAGTATGT-1   | 1249364 | 17608  | 137760 | 990661  | 137760  | 322 | 0.020971743 | 3.05486324  | 3.03470009  | 0.100394281 | 0.100394976 | 0 |
| GAGGTGACAGTGATA-1   | 2726140 | 35698  | 297126 | 226754  | 2166562 | 700 | 0.063187278 | 6.481346267 | 3.044153686 | 0.072366932 | 0.071952718 | 0 |
| GAGGTGATACACGGC-1   | 1401354 | 48905  | 148657 | 117683  | 1086309 | 351 | 0.031545617 | 3.324517233 | 3.125362328 | 0.117556765 | 0.118438842 | 1 |
| GATGTCCGAGGTGTGA-1  | 2131810 | 33054  | 228821 | 159489  | 1675346 | 541 | 0.04886716  | 5.0522854   | 3.027165844 | 0.083107021 | 0.08158331  | 0 |
| GATGTCCGATCAGTGT-1  | 1850328 | 24091  | 202755 | 148461  | 1475021 | 476 | 0.043016021 | 4.4760391   | 3.093631709 | 0.087752362 | 0.085105131 | 0 |
| GATGTCCGGTACTGCTA-1 | 1311384 | 16339  | 140964 | 117972  | 1036109 | 335 | 0.030239005 | 3.032746797 | 3.037336855 | 0.103688486 | 0.103576913 | 0 |
| GATGTCCGGCTCTAGT-1  | 1067466 | 15559  | 117361 | 84628   | 890018  | 275 | 0.024753602 | 2.6171019   | 3.088224558 | 0.114169704 | 0.114045212 | 0 |
| GATGTCCGTAGCAACT-1  | 2342610 | 41049  | 255765 | 207407  | 1838389 | 594 | 0.051505592 | 5.522209033 | 3.031324154 | 0.081281604 | 0.080759943 | 0 |
| GATCATGTCAAGCAGGA-1 | 1438234 | 25436  | 150044 | 128712  | 1290422 | 365 | 0.031928964 | 3.475754633 | 2.957938624 | 0.096280823 | 0.096280823 | 0 |
| GATCATGTCCACCAT-1   | 2476484 | 27238  | 273097 | 211762  | 1964587 | 635 | 0.057389122 | 5.915584067 | 3.036962036 | 0.076831969 | 0.077662481 | 0 |
| GATCATGTCCGCTCAT-1  | 2021266 | 55838  | 215003 | 186603  | 1563822 | 505 | 0.045595363 | 4.748282033 | 3.126734249 | 0.089424265 | 0.085164249 | 0 |
| GATCATGTCTTACTCT-1  | 692496  | 9082   | 75307  | 56286   | 552021  | 178 | 0.01611553  | 1.727162233 | 3.105981598 | 0.148158038 | 0.148158038 | 0 |
| GATCCGAGTCACTAC-1   | 1973362 | 22739  | 213469 | 165444  | 1571720 | 548 | 0.045862498 | 4.7475962   | 3.0168857   | 0.089034564 | 0.087312138 | 0 |
| GATCTAAGTAGGCGCA-1  | 1791346 | 59937  | 183888 | 1389407 | 158114  | 409 | 0.040489652 | 4.2361245   | 3.012186521 | 0.088321654 | 0.087281407 | 0 |
| GATCTGACACCGGAA-1   | 1640214 | 24329  | 175127 | 142220  | 1298538 | 419 | 0.037899165 | 3.9782238   | 3.06779802  | 0.088139582 | 0.094615624 | 0 |
| GATCTGACATCAGGT-1   | 2118062 | 33293  | 228755 | 188282  | 1667762 | 539 | 0.048604703 | 5.0115123   | 3.138066963 | 0.081609779 | 0.082855695 | 0 |
| GATCTGACATGATCT-1   | 2730536 | 64379  | 230815 | 213686  | 2342285 | 684 | 0.061344933 | 6.2422853   | 3.163201523 | 0.085702418 | 0.084237103 | 1 |
| GATCTAGCAAGTGTCT-1  | 2368390 | 31654  | 257348 | 211351  | 1868037 | 603 | 0.054285403 | 5.588488167 | 3.108196132 | 0.085412275 | 0.082878267 | 0 |
| GATCTAGTACGCTCT-1   | 1557342 | 50925  | 165106 | 139675  | 1201636 | 388 | 0.034868083 | 3.621311033 | 3.005398601 | 0.106458133 | 0.100341323 | 0 |
| GATGAAAGATATCCC-1   | 2292638 | 29727  | 246614 | 200322  | 1814245 | 586 | 0.052832474 | 5.453982367 | 3.12287395  | 0.083950471 | 0.083831712 | 0 |
| GATGAAACAAGTAGCG-1  | 1735364 | 31412  | 188885 | 154758  | 1360069 | 439 | 0.039705169 | 4.1515519   | 2.87047707  | 0.080783958 | 0.086652508 | 1 |
| GATGAAACATGCAATT-1  | 1765572 | 28915  | 194158 | 144272  | 1389227 | 448 | 0.040497631 | 4.221143733 | 2.971000568 | 0.093727602 | 0.092974895 | 0 |
| GATGAAAGTACGCGCA-1  | 1936592 | 84951  | 201128 | 169503  | 1461010 | 472 | 0.042573285 | 4.4444607   | 3.036380826 | 0.087529974 | 0.086405265 | 0 |
| GATGAAAGTACATAC-1   | 2130778 | 33609  | 230028 | 191638  | 1605503 | 535 | 0.040909077 | 4.952792467 | 2.963130017 | 0.086809133 | 0.086921523 | 0 |
| GATGAGGAGATGGCTT-1  | 2266998 | 180079 | 238016 | 1724595 | 156108  | 557 | 0.058182023 | 5.187408    | 3.003429811 | 0.091524376 | 0.091542284 | 1 |
| GATGTAGTAGGCTGA-1   | 1521416 | 19389  | 165432 | 142624  | 1193971 | 386 | 0.034869701 | 3.676908867 | 3.068785737 | 0.095548724 | 0.095519433 | 0 |
| GATGTAGTCTCTCTGT-1  | 2148888 | 41912  | 229747 | 186792  | 1690437 | 546 | 0.049335229 | 5.113125    | 2.993348926 | 0.086053893 | 0.085153952 | 0 |
| GATGTAGTGTCTCTAC-1  | 2744570 | 28944  | 302181 | 2179818 | 233627  | 704 | 0.06146832  | 6.7779754   | 3.079342977 | 0.080888573 | 0.087277904 | 0 |
| GATGTAGTGTGAACG-1   | 1665998 | 87995  | 173298 | 144934  | 1259772 | 407 | 0.036658219 | 3.8463398   | 2.960847267 | 0.090797073 | 0.092004266 | 0 |
| GATGTATCTACTATGG-1  | 1110078 | 16949  | 123829 | 88699   | 880701  | 284 | 0.025734216 | 2.7095558   | 3.108377008 | 0.111534161 | 0.112007878 | 0 |
| GATGTATCTATAGGA-1   | 1808598 | 39890  | 193938 | 160610  | 1414160 | 457 | 0.041326882 | 4.2557505   | 3.092979639 | 0.080124196 | 0.088761388 | 0 |
| GATTCTAGATGTGGC-1   | 2882124 | 31849  | 317688 | 251040  | 2280637 | 737 | 0.066539417 | 6.8103709   | 3.097838364 | 0.074389532 | 0.073366297 | 0 |
| GATTAGGATCTAGTGT-1  | 2196964 | 35687  | 188028 | 1734172 | 1591632 | 560 | 0.050545926 | 5.216288833 | 3.142120051 | 0.087716322 | 0.086008679 | 0 |
| GATTACTGTGCAACAT-1  | 2363820 | 66860  | 255198 | 214580  | 1827182 | 590 | 0.05148991  | 5.466758933 | 3.092181906 | 0.086599998 | 0.083781515 | 0 |
| GCAAACTAGCCAGCTG-1  | 1280606 | 22599  | 138617 | 111399  | 1007991 | 326 | 0.029314657 | 3.090762933 | 3.044396787 | 0.105751905 | 0.106464817 | 0 |
| GCAAACTCAAGCAAG-1   | 1970636 | 12455  | 213361 | 173018  | 1551801 | 501 | 0.054781715 | 4.7173569   | 3.142023056 | 0.084096916 | 0.081661195 | 0 |
| GCAAACTCAATGTGT-1   | 2304508 | 30833  | 253175 | 192842  | 1827608 | 590 | 0.053358368 | 5.505536067 | 3.081839796 | 0.080413701 | 0.079181238 | 0 |
| GCAAACTCTCTACAA-1   | 1493416 | 19440  | 165142 | 127175  | 1181609 | 382 | 0.034002779 | 3.620446133 | 3.182339344 | 0.097600555 | 0.097600555 | 0 |
| GCAATCAAGGCAACAC-1  | 2040879 | 38776  | 220581 | 182889  | 1598022 | 516 | 0.04654745  | 4.8263927   | 2.973894327 | 0.086502293 | 0.080615672 | 0 |
| GCAATCAGTATGTGA-1   | 2844122 | 27445  | 313809 | 238124  | 2264544 | 732 | 0.066151562 | 6.7817772   | 3.122862603 | 0.072597467 | 0.070689066 | 0 |
| GCAATCAGTGTCTCT-1   | 2284926 | 51110  | 247231 | 1789299 | 1573432 | 578 | 0.052132401 | 5.3734342   | 3.004440592 | 0.085478066 | 0.084612502 | 0 |
| GCAATCATCTCTGAGG-1  | 1955304 | 29829  | 212996 | 167315  | 1545164 | 492 | 0.045125148 | 4.702526067 | 2.996079323 | 0.086022886 | 0.084392016 | 0 |
| GCAATCATCTCTGTAC-1  | 3129206 | 24112  | 362848 | 305603  | 2636543 | 852 | 0.077159929 | 7.801600267 | 3.009397215 | 0.083775286 | 0.080232964 | 0 |
| GCAATAGTATGCGAT-1   | 2628698 | 42475  | 239679 | 237963  | 2064281 | 667 | 0.060255533 | 6.192304033 | 2.985358575 | 0.079081119 | 0.078528773 | 0 |
| GCACTCTAGCTTGGG-1   | 1539538 | 90881  | 155091 | 131886  | 1141580 | 369 | 0.033226163 | 3.5074068   | 3.1464047   | 0.095345632 | 0.097108566 | 0 |
| GCACTCTAGTACTTGT-1  | 1195050 | 21377  | 128951 | 98457   | 946265  | 306 | 0.027651376 | 2.9252469   | 3.128532167 | 0.107455851 | 0.105965383 | 0 |
| GCACTCTAGTCAAGG-1   | 1568648 | 20518  | 170669 | 136877  | 1240584 | 401 | 0.036212069 | 3.808155423 | 3.033669316 | 0.096348778 | 0.096231297 | 0 |
| GCACTCTAAGTAGTGG-1  | 1192130 | 15695  | 130380 | 100735  | 945320  | 305 | 0.027650322 | 2.9171426   | 3.081614974 | 0.107435174 | 0.107108926 | 0 |
| GCACTCTCACTTGTG-1   | 1427692 | 28006  | 154921 | 1124838 | 1058772 | 363 | 0.032880372 | 3.4552007   | 3.077858051 | 0.097301119 | 0.097301119 | 0 |
| GCGACCAAGACAGCA-1   | 1704214 | 28208  | 184453 | 146714  | 1344839 | 434 | 0.039198108 | 4.0858639   | 2.154060664 | 0.083564732 | 0.081002764 | 1 |
| GCGACCAAGTATGAT-1   | 1239600 | 14768  | 136445 | 102956  | 985231  | 318 | 0.02867376  | 3.021949333 | 2.982728009 | 0.107036511 | 0.106537608 | 0 |
| GCGACCAAGTGTCTT-1   | 2385760 | 22432  | 254762 | 188653  | 1586273 | 609 | 0.054962719 | 5.682672333 | 3.089569942 | 0.093613077 | 0.093613077 | 1 |
| GCGACCATCTGCTTAC-1  | 2487958 | 25187  | 269366 | 214977  | 1978428 | 639 | 0.057626539 | 5.922392267 | 3.0587458   | 0.080318827 | 0.078450086 | 0 |
| GCGATTAAGGCCCTTG-1  | 1509446 | 20266  | 164916 | 129629  | 1194275 | 386 | 0.034862012 | 3.656346067 | 3.106214232 | 0.094801539 | 0.096456946 | 0 |
| GCGATTAAGTAGCGTG-1  | 1449734 | 17626  | 158807 | 117095  | 1156206 | 373 | 0.033794401 | 3.546297267 | 3.108552842 | 0.100839918 | 0.100531095 | 0 |
| GCGATTAAGTAGAGGG-1  | 1980468 | 42189  | 211206 | 173171  | 1553902 | 502 | 0.045370147 | 4.722401833 | 2.993713417 | 0.084592204 | 0.085698546 | 0 |
|                     |         |        |        |         |         |     |             |             |             |             |             |   |

|                     |         |        |        |         |            |     |              |             |              |             |             |   |
|---------------------|---------|--------|--------|---------|------------|-----|--------------|-------------|--------------|-------------|-------------|---|
| GCCTCTATCAGTAGT-1   | 1419686 | 14326  | 156326 | 122246  | 1126688    | 364 | 0.03292355   | 3.4554272   | 3.048362113  | 0.102377502 | 0.101477486 | 0 |
| GCGCAGCAACATCTG-1   | 1136444 | 18209  | 123847 | 93056   | 901332     | 291 | 0.026248254  | 2.789514733 | 3.039111481  | 0.103652108 | 0.104602808 | 0 |
| GCGCAGCTCTCACT-1    | 1891298 | 17540  | 159578 | 1450974 | 1450974    | 469 | 0.044196193  | 4.400750267 | 2.884080841  | 0.091970732 | 0.089665349 | 0 |
| GCGAAGAACTGTCAGT-1  | 1119340 | 7521   | 121890 | 94084   | 895965     | 289 | 0.0261171881 | 2.780150293 | 3.0891326166 | 0.114496316 | 0.112414357 | 0 |
| GCSCATGAGCTAGTAC-1  | 2121236 | 31338  | 244800 | 192987  | 1743011    | 563 | 0.050791746  | 5.366660223 | 2.999387986  | 0.084795059 | 0.082467346 | 0 |
| GCSCAGTGTACTGTA-1   | 1001110 | 14102  | 105180 | 797667  | 84161      | 238 | 0.021252843  | 2.470162667 | 3.018899953  | 0.114953278 | 0.111979735 | 0 |
| GCSCAGTGTACAGCA-1   | 1393070 | 14829  | 148032 | 126156  | 1021863    | 356 | 0.031731614  | 3.3965511   | 3.106174213  | 0.099100041 | 0.100014594 | 0 |
| GCSCAGTGTGACCA-1    | 1699622 | 34643  | 179720 | 148487  | 1340412    | 433 | 0.039222512  | 4.097738267 | 3.117300209  | 0.09530551  | 0.091869249 | 0 |
| GCSCAAAGCAGAA-1     | 1154256 | 21181  | 130667 | 93651   | 906757     | 293 | 0.038402085  | 2.798021633 | 3.033788036  | 0.112476028 | 0.108184146 | 0 |
| GCSCAAGTGTGCAAT-1   | 2001368 | 19288  | 214930 | 169184  | 1597966    | 516 | 0.046684363  | 4.8431164   | 3.043044288  | 0.087938427 | 0.084132442 | 0 |
| GCSCAATCTCTCACTG-1  | 1388218 | 60090  | 142834 | 121257  | 1063897    | 344 | 0.030949828  | 3.2647979   | 3.171219353  | 0.099593979 | 0.099396853 | 0 |
| GCSCGATAGCACTGGT-1  | 2082546 | 30088  | 221435 | 183834  | 1647189    | 532 | 0.048114145  | 4.980123167 | 3.106563432  | 0.082741137 | 0.084254232 | 0 |
| GCSCGATAGTATATAC-1  | 1782566 | 21281  | 152003 | 150078  | 1420104    | 459 | 0.041428127  | 4.311192767 | 3.116289972  | 0.092549216 | 0.090282229 | 0 |
| GCSCGATGTCTACTAG-1  | 786220  | 11571  | 84865  | 67995   | 621789     | 201 | 0.018169034  | 1.932812467 | 2.992017273  | 0.145706791 | 0.143186783 | 1 |
| GCSCGGTAGGATTGA-1   | 3468752 | 87806  | 357613 | 307766  | 2715267    | 877 | 0.079353661  | 8.056599667 | 2.977217469  | 0.065007975 | 0.065007975 | 0 |
| GCSCGGTAGTGTATCC-1  | 2134886 | 57681  | 219032 | 188563  | 1669410    | 539 | 0.048131446  | 4.965499167 | 3.041017151  | 0.083847749 | 0.085234433 | 0 |
| GCSCGGTTCTATGCCC-1  | 1786222 | 32765  | 187875 | 171146  | 1394436    | 450 | 0.040545366  | 4.2169994   | 3.036351366  | 0.100398457 | 0.099364927 | 0 |
| GCCTCAAGATCCCGC-1   | 2217126 | 12886  | 239120 | 208331  | 1761587    | 569 | 0.051196997  | 5.329333533 | 3.113858678  | 0.089904471 | 0.080220724 | 0 |
| GCCTCAAGCCGCGAAA-1  | 1569384 | 24000  | 170193 | 1239546 | 135645     | 400 | 0.03614803   | 3.7945494   | 2.892403352  | 0.086614095 | 0.079171989 | 0 |
| GCCTCATCCAGAA-1     | 1973300 | 30021  | 213755 | 180520  | 1549204    | 500 | 0.045136819  | 4.6742327   | 2.980773879  | 0.084712928 | 0.084712928 | 0 |
| GCCTCTAGTAGTGG-1    | 1889480 | 29841  | 203823 | 168684  | 1487122    | 480 | 0.040215161  | 4.527392393 | 3.04766235   | 0.089311793 | 0.087208423 | 0 |
| GCCTCTAGTGTAGCGG-1  | 1473400 | 43378  | 155035 | 134302  | 1140085    | 368 | 0.031261167  | 3.502342533 | 2.972855241  | 0.10085759  | 0.101317138 | 0 |
| GCCTCTGTAAATCTGAC-1 | 2338690 | 22205  | 254668 | 210923  | 1850894    | 528 | 0.053951013  | 5.580111367 | 2.970937171  | 0.080117493 | 0.079203002 | 0 |
| GCCTGTGTGCTACTT-1   | 2039068 | 26192  | 243114 | 172988  | 1615574    | 598 | 0.047124909  | 4.882893467 | 2.990539034  | 0.085816903 | 0.086585158 | 0 |
| GCCTGAGGAGGAGTTGC-1 | 2145342 | 24600  | 230800 | 191143  | 1698799    | 549 | 0.040404521  | 5.125430267 | 3.0742614    | 0.087634577 | 0.086601345 | 0 |
| GCCTGAGTAACTGCTGG-1 | 1601104 | 28418  | 170676 | 136656  | 1265354    | 409 | 0.0367472    | 3.8746192   | 3.040706141  | 0.080306945 | 0.090390945 | 0 |
| GCCTGAGTGGCGGAAA-1  | 1184218 | 29060  | 122966 | 924423  | 1077695    | 299 | 0.030970945  | 2.858519567 | 3.113688027  | 0.03631241  | 0.104903508 | 0 |
| GCCTGAGGTGAACAA-1   | 1378032 | 26260  | 148603 | 120699  | 1082300    | 350 | 0.031538656  | 3.3124057   | 2.92472049   | 0.101450336 | 0.100685233 | 0 |
| GCCTGCGAACCTCTGAC-1 | 2180556 | 24785  | 237846 | 190074  | 1727351    | 558 | 0.050421845  | 5.208405    | 3.081480534  | 0.082748554 | 0.082533239 | 0 |
| GCCTGATCATCTACAG-1  | 1196642 | 16891  | 130169 | 950954  | 982678     | 307 | 0.027671594  | 2.926947267 | 3.110108226  | 0.110095855 | 0.104244951 | 0 |
| GCCTGTCTCAGTACTA-1  | 2029778 | 46929  | 218270 | 178555  | 1566024    | 506 | 0.045646137  | 4.7583443   | 3.111742488  | 0.089384508 | 0.087736537 | 0 |
| GCCTGTCTGTACTTAG-1  | 1271376 | 13723  | 139301 | 1009881 | 108471     | 326 | 0.02952753   | 3.290056    | 3.091755565  | 0.103493786 | 0.103493786 | 0 |
| GCCTGTCTCAGTACAC-1  | 2594706 | 28978  | 282947 | 241106  | 2041675    | 640 | 0.059499654  | 6.117805267 | 3.113147371  | 0.076547431 | 0.075181457 | 0 |
| GCCTGGTAGGACTATA-1  | 1019942 | 13332  | 109971 | 78207   | 818432     | 264 | 0.021928221  | 2.526921433 | 3.080781902  | 0.111967818 | 0.11128256  | 0 |
| GCCTGGTAGTCACTGG-1  | 2003818 | 61327  | 179873 | 1554079 | 1554079    | 502 | 0.048299218  | 2.988943367 | 2.988943367  | 0.083961261 | 0.083961261 | 0 |
| GCCTGGTGTGTAGTTC-1  | 2150790 | 79467  | 221476 | 187721  | 1661326    | 537 | 0.048009844  | 4.917046367 | 2.971244894  | 0.08401051  | 0.089070305 | 0 |
| GCCTGGGTGTGCTGCTG-1 | 1083488 | 33420  | 111155 | 94914   | 843999     | 273 | 0.02462948   | 2.625520667 | 3.077092965  | 0.112552134 | 0.112552134 | 0 |
| GCCTGGGTCTTATGTTG-1 | 1179430 | 18997  | 127464 | 93994   | 93994      | 303 | 0.027392034  | 2.8785921   | 3.024250472  | 0.10586632  | 0.106474569 | 0 |
| GCCTTCAAGGGTTTCT-1  | 2141276 | 63489  | 226483 | 188756  | 1635548    | 528 | 0.047591927  | 4.92854573  | 3.104599188  | 0.083958841 | 0.085589993 | 0 |
| GCCTTCACTCCAGAA-1   | 1383004 | 16058  | 152214 | 118588  | 1095874    | 354 | 0.031944853  | 3.368082333 | 2.948985818  | 0.101092708 | 0.098330771 | 0 |
| GCCTTCATCTGGCTCT-1  | 2235898 | 66248  | 236336 | 202863  | 1730251    | 559 | 0.050402382  | 5.228990933 | 3.108784619  | 0.082721347 | 0.081940211 | 0 |
| GCCTTCATCTCGCACT-1  | 1562214 | 17524  | 166789 | 147342  | 1210559    | 391 | 0.035232653  | 3.692380167 | 3.0964491    | 0.101968117 | 0.096068885 | 0 |
| GCCTTGAAGAGTGCTTA-1 | 1007868 | 27898  | 166443 | 1505536 | 1505536    | 486 | 0.041967841  | 4.570507067 | 3.029399903  | 0.08666868  | 0.085951881 | 0 |
| GCCTTGAAGTAGCGAT-1  | 2641892 | 44237  | 285824 | 239980  | 2071851    | 669 | 0.060461778  | 6.195380533 | 2.991228694  | 0.095440983 | 0.095296133 | 1 |
| GGAAAGAGCAGAGAAC-1  | 2147380 | 48220  | 227431 | 193417  | 1678322    | 542 | 0.048820358  | 5.054704733 | 2.992215614  | 0.08826692  | 0.08723823  | 0 |
| GGAAAGCAGTACTCA-1   | 1805130 | 97916  | 187988 | 154409  | 1375017    | 444 | 0.039960363  | 4.177748967 | 3.095924658  | 0.090427541 | 0.088148011 | 0 |
| GGAAAGCTCACTCTG-1   | 1024530 | 20504  | 108410 | 90219   | 804997     | 260 | 0.023486247  | 2.487053367 | 3.029748863  | 0.117876784 | 0.114799225 | 0 |
| GGAAAGCTCGTGATCA-1  | 1224228 | 29547  | 14052  | 107820  | 973309     | 314 | 0.028435231  | 3.0005882   | 3.144325211  | 0.106542738 | 0.106503394 | 0 |
| GGAACTAGGGCTCTCT-1  | 2034862 | 13750  | 218315 | 193245  | 1609462    | 520 | 0.047022897  | 4.882649933 | 3.034424948  | 0.086651973 | 0.085101625 | 0 |
| GGAACTTCAACAGTCT-1  | 384970  | 6873   | 41438  | 30373   | 306386     | 99  | 0.008935834  | 0.965921567 | 3.250678026  | 0.224546104 | 0.224546104 | 1 |
| GGAACTGTGGGAAT-1    | 2125044 | 30224  | 230842 | 1871035 | 1540756    | 540 | 0.050720967  | 2.863545699 | 0.083973487  | 0.082732821 | 0.082732821 | 0 |
| GGAACTTGTTCATTCT-1  | 2006478 | 30783  | 219528 | 177324  | 1579043    | 510 | 0.046050611  | 4.7822081   | 3.024420042  | 0.086849674 | 0.086205717 | 0 |
| GGAACTTCTGATACAC-1  | 1884300 | 49928  | 202080 | 166954  | 1465338    | 473 | 0.040715764  | 4.4421236   | 2.949179487  | 0.088699314 | 0.088212985 | 0 |
| GGAAATTTCTTAAGACC-1 | 1922192 | 16715  | 205603 | 169403  | 1530471    | 494 | 0.045409785  | 4.618114667 | 3.121633912  | 0.1083547   | 0.1083547   | 1 |
| GGACAGAGGGATTTA-1   | 1730070 | 33024  | 187609 | 149545  | 1359892    | 439 | 0.031667722  | 3.154689367 | 3.0381591    | 0.092199968 | 0.089806455 | 0 |
| GGACAGAGGTGAAGT-1   | 584380  | 6228   | 69399  | 446422  | 464422     | 150 | 0.01915407   | 1.453776067 | 3.045282858  | 0.146594478 | 0.146594478 | 0 |
| GGACAGGTTCTAGTAC-1  | 1688202 | 40044  | 200829 | 168289  | 1449120    | 471 | 0.040251675  | 4.369242367 | 2.932402731  | 0.092089566 | 0.092551822 | 0 |
| GGACAGTGCAGGAA-1    | 1799638 | 34909  | 152998 | 151754  | 1419977    | 459 | 0.041449417  | 4.3244544   | 2.934117831  | 0.0930896   | 0.090186927 | 0 |
| GGACAGTCTCGGCAAC-1  | 1676210 | 52543  | 148622 | 1299472 | 1356732    | 420 | 0.037823346  | 3.970268967 | 3.106461363  | 0.093188151 | 0.091578687 | 0 |
| GGACAGAGGTGTCTGG-1  | 1786130 | 43952  | 191537 | 158790  | 1392051    | 508 | 0.04063412   | 4.2553263   | 2.890626665  | 0.02998267  | 0.092998267 | 0 |
| GGACAGAAACCCCTA-1   | 2020568 | 50815  | 217363 | 180771  | 1571619    | 450 | 0.045860992  | 4.771284633 | 3.064808303  | 0.083490179 | 0.082223704 | 0 |
| GGACAGACAGCCACTG-1  | 1672180 | 14472  | 182917 | 1323356 | 141515     | 427 | 0.038059462  | 4.027884867 | 3.03908567   | 0.094487664 | 0.091095923 | 0 |
| GGACATGATCAAGCG-1   | 1105060 | 110919 | 109411 | 93064   | 795626     | 256 | 0.021994249  | 2.446703267 | 2.772892524  | 0.115093295 | 0.1167798   | 0 |
| GGACCTCAGAACTTCT-1  | 2248020 | 19705  | 242742 | 204418  | 1781155    | 575 | 0.05185345   | 5.3748853   | 3.017651655  | 0.081179634 | 0.080278905 | 0 |
| GGACCTCAGCAGTGTCT-1 | 1778986 | 34586  | 193117 | 157425  | 1393858    | 450 | 0.040520955  | 4.2243649   | 3.057720821  | 0.090386625 | 0.088940511 | 0 |
| GGAGCAAGGTTGCTTT-1  | 2379744 | 56090  | 255102 | 210141  | 1838411    | 600 | 0.054038866  | 5.555326967 | 3.000241494  | 0.084029062 | 0.08236655  | 0 |
| GGAGCAAGCAGAGCT-1   | 2606732 | 27342  | 282881 | 2024055 | 1600514957 | 670 | 0.060514957  | 6.244203067 | 3.493896287  | 0.097029229 | 0.097029229 | 1 |
| GGATGTGTGCCAGGAT-1  | 2517512 | 38568  | 272946 | 207528  | 1998470    | 646 | 0.058273923  | 5.982906333 | 3.080021599  | 0.075374659 | 0.076221388 | 0 |
| GGATGTAGTGTACTCT-1  | 2090596 | 63638  | 220121 | 186411  | 1610426    | 523 | 0.040715102  | 4.8946039   | 3.02355576   | 0.086974661 | 0.086974661 | 0 |
| GGATTAGCCCACTCTG-1  | 1178184 | 17574  | 116319 | 1075727 | 141515     | 347 | 0.031137621  | 3.302494733 | 3.001143295  | 0.099802176 | 0.10032042  | 0 |
| GGATTAGCTACTGTGT-1  | 1255810 | 23756  | 136323 | 101847  | 999884     | 321 | 0.028909399  | 3.0583242   | 3.073144399  | 0.10839763  | 0.106598828 | 0 |
| GGATTACTCAACAAC-1   | 2254992 | 26544  | 243661 | 203461  | 1781326    | 576 | 0.05191863   | 5.3652253   | 3.067935922  | 0.086120394 | 0.085369169 | 0 |
| GGATTACTCTGGTGTCT-1 | 387132  | 2855   | 41428  | 33730   | 309219     | 100 | 0.030904154  | 0.975458623 | 3.024146598  | 0.191868686 | 0.187923039 | 0 |
| GGCAATGTCAACGG-1    | 1403666 | 58903  | 146902 | 118508  | 1079353    | 349 | 0.031476651  | 3.319677767 | 2.9911777    |             |             |   |

|                    |         |        |        |         |           |     |             |             |             |             |              |   |
|--------------------|---------|--------|--------|---------|-----------|-----|-------------|-------------|-------------|-------------|--------------|---|
| GGGAGATAGGCTAGCA-1 | 1464372 | 81476  | 148641 | 124443  | 1109812   | 339 | 0.03212755  | 3.396830567 | 3.011594038 | 0.103625357 | 0.101485172  | 0 |
| GGGAGATACAGACCC-1  | 1445274 | 16720  | 153282 | 173037  | 1138255   | 368 | 0.031112131 | 3.487429533 | 3.094999645 | 0.097551081 | 0.098875391  | 0 |
| GGGAGATAGGCTGCT-1  | 1322744 | 61694  | 134038 | 1017334 | 1327377   | 329 | 0.020634641 | 3.12737277  | 3.082302364 | 0.102480786 | 0.102588551  | 0 |
| GGGAGATACGTGAGTT-1 | 1620696 | 32403  | 172213 | 1312210 | 1274870   | 412 | 0.037112186 | 3.884437167 | 3.056447465 | 0.099152884 | 0.094966948  | 0 |
| GGGCACTGTGCAAGCC-1 | 1673214 | 15677  | 175753 | 158646  | 1219238   | 426 | 0.038273518 | 4.0264547   | 3.144706842 | 0.092346688 | 0.09247291   | 0 |
| GGGCACTGTTCAGGG-1  | 1698288 | 43519  | 181239 | 149795  | 1323745   | 428 | 0.038600285 | 4.055688    | 3.167953737 | 0.09228736  | 0.08968329   | 0 |
| GGGCACTCAGGCTGAC-1 | 2290296 | 40688  | 245640 | 206613  | 1798355   | 581 | 0.052392253 | 5.420374567 | 2.986480439 | 0.092881467 | 0.097095152  | 0 |
| GGGCACTGCTCTATT-1  | 827990  | 29393  | 87000  | 65324   | 646273    | 209 | 0.018833198 | 1.988604    | 3.011525806 | 0.127830609 | 0.125584586  | 0 |
| GGGCACTCTGAACCG-1  | 1123326 | 56474  | 115030 | 99832   | 853490    | 275 | 0.034788732 | 2.646595333 | 2.976332489 | 0.110860234 | 0.110860234  | 0 |
| GGGTGTGATCGGTG-1   | 1079282 | 189727 | 93001  | 85305   | 711349    | 230 | 0.02057078  | 2.1204806   | 3.00572305  | 0.122371709 | 0.119515638  | 0 |
| GGGTGTGCTCAGGATA-1 | 1568498 | 23022  | 169627 | 136331  | 1240518   | 401 | 0.036185353 | 3.796488767 | 3.130163893 | 0.095140917 | 0.09221101   | 0 |
| GGGTGTGCTGCTGCT-1  | 1373334 | 39325  | 144117 | 121052  | 1068940   | 345 | 0.031163606 | 3.288426133 | 3.04180665  | 0.100745967 | 0.101794964  | 0 |
| GGTATTAGGGGTGCG-1  | 2073240 | 36561  | 217346 | 180500  | 1622283   | 527 | 0.04768245  | 4.960465367 | 2.938348952 | 0.086203725 | 0.082375186  | 0 |
| GGTATTGAGGTTCCTA-1 | 1882342 | 39405  | 199714 | 170079  | 1473144   | 476 | 0.04297718  | 4.484453533 | 3.151106375 | 0.089329853 | 0.088926564  | 0 |
| GGTGAAGGTTACTGTG-1 | 1246628 | 34043  | 131859 | 101387  | 979339    | 336 | 0.028520823 | 3.0128821   | 3.044196688 | 0.108374062 | 0.10543602   | 0 |
| GGTGTGCTACTACTG-1  | 738116  | 18923  | 73869  | 64911   | 850913    | 118 | 0.016917567 | 1.8065352   | 2.91571741  | 0.135975037 | 0.134444291  | 0 |
| GGTGTGTGTGTTGAG-1  | 1834234 | 44300  | 190541 | 159274  | 1440309   | 465 | 0.042074139 | 4.405351567 | 3.03859213  | 0.090032357 | 0.089373655  | 0 |
| GGTGTAGTACGTGGA-1  | 1852090 | 28677  | 197814 | 167148  | 1458451   | 471 | 0.042593949 | 4.451374367 | 2.955483903 | 0.087571538 | 0.087947715  | 0 |
| GTAACGTAGGACGTA-1  | 2001772 | 22998  | 123064 | 1546728 | 130643947 | 500 | 0.049389497 | 4.654238867 | 3.037138202 | 0.088666133 | 0.088078704  | 0 |
| GTAACGTAGTGGTAT-1  | 1844214 | 14606  | 204022 | 149438  | 1476148   | 477 | 0.043127049 | 4.472399033 | 3.068077852 | 0.095639637 | 0.094890625  | 1 |
| GTAACGTCCCAACAA-1  | 1135346 | 10007  | 122530 | 92843   | 889566    | 287 | 0.025963503 | 2.729980523 | 3.003234206 | 0.102802297 | 0.104546231  | 0 |
| GTAACGTAGCGGTGCT-1 | 1257814 | 30327  | 113606 | 99349   | 93939     | 321 | 0.028961561 | 3.061665533 | 3.025107752 | 0.108256055 | 0.105861299  | 0 |
| GTAACGTGATAGGGCA-1 | 1642380 | 59903  | 170003 | 151810  | 1260864   | 407 | 0.036883139 | 3.843016233 | 2.901381245 | 0.095753029 | 0.095336948  | 0 |
| GTAACGTGTGATGCG-1  | 1634170 | 97216  | 139436 | 123035  | 123035    | 397 | 0.034030933 | 3.124152013 | 3.042152013 | 0.096053094 | 0.096053094  | 0 |
| GTAACGTGTTGATCT-1  | 2035178 | 34486  | 221429 | 183040  | 1596223   | 516 | 0.046497263 | 4.831227333 | 3.080909252 | 0.087264088 | 0.08563263   | 0 |
| GTAACGTCTGAATGTC-1 | 1770882 | 18470  | 194034 | 154829  | 1403509   | 453 | 0.04091448  | 4.2600948   | 3.144631621 | 0.091701272 | 0.090232346  | 0 |
| GTAACGTAGCGGCCCA-1 | 1406312 | 40276  | 168600 | 1251884 | 1486200   | 500 | 0.048486075 | 3.842740267 | 2.968407732 | 0.097376631 | 0.09504845   | 0 |
| GTAACGTAGTGGCTGT-1 | 1263726 | 43782  | 132324 | 109365  | 978255    | 316 | 0.028513093 | 3.016483    | 3.091430114 | 0.103142521 | 0.102085807  | 0 |
| GTAACCGTCAAGTTTG-1 | 1234882 | 36216  | 142349 | 114123  | 1042384   | 237 | 0.030393146 | 3.194262523 | 2.956359034 | 0.104837405 | 0.102125765  | 0 |
| GTAACGTGTGGTATCT-1 | 2946454 | 21926  | 308439 | 252168  | 2263921   | 731 | 0.059291134 | 6.727206767 | 3.011988866 | 0.075501852 | 0.075586041  | 0 |
| GTAACGTAGGTAATCT-1 | 2239942 | 24738  | 204418 | 204154  | 1770632   | 572 | 0.051473221 | 5.326178367 | 2.985659187 | 0.089545725 | 0.087237998  | 0 |
| GTAACGTAGAGCGCTT-1 | 1991260 | 43421  | 215430 | 169752  | 1562657   | 505 | 0.045575805 | 4.7349636   | 3.089631938 | 0.084394794 | 0.084975202  | 0 |
| GTAACTTGTAGTCACT-1 | 2234966 | 20315  | 239598 | 218719  | 1876734   | 608 | 0.054644413 | 5.645589533 | 3.143200603 | 0.080331976 | 0.08064509   | 0 |
| GTAGGCCCACTGGCT-1  | 2141392 | 62480  | 223524 | 190381  | 1660507   | 538 | 0.048486815 | 5.035866067 | 3.060473647 | 0.088403094 | 0.088252045  | 0 |
| GTAGGCCGTGATGTA-1  | 1060974 | 20763  | 113145 | 85220   | 848646    | 274 | 0.024685543 | 2.61404367  | 3.001404662 | 0.110188677 | 0.110188677  | 0 |
| GTAGGCCYCTCTGAC-1  | 2451642 | 27215  | 259484 | 221394  | 1943549   | 628 | 0.056639835 | 5.840827867 | 3.074964127 | 0.078546254 | 0.07719403   | 0 |
| GTAGGCTCTGTGTGTA-1 | 389230  | 2101   | 38896  | 32866   | 315247    | 102 | 0.009232303 | 1.002057967 | 3.077361705 | 0.188946594 | 0.188946594  | 0 |
| GTAGGCTCTCGAGCG-1  | 1020332 | 90127  | 95815  | 88987   | 745403    | 241 | 0.021690516 | 2.3167042   | 2.968234359 | 0.118079191 | 0.115256473  | 0 |
| GTAGGAGTCAATACG-1  | 1645666 | 40285  | 174907 | 144186  | 1286288   | 416 | 0.037559748 | 3.928386733 | 3.002614546 | 0.093161592 | 0.095377007  | 0 |
| GTAGCTCTGAACCG-1   | 1257550 | 118777 | 123058 | 104485  | 911230    | 294 | 0.028486752 | 2.80773866  | 3.039002635 | 0.105174573 | 0.1031651903 | 0 |
| GTAATCTAGGGAGTAA-1 | 1625648 | 14206  | 176172 | 137334  | 1308136   | 423 | 0.03822822  | 3.9660803   | 2.958566647 | 0.091547556 | 0.092474524  | 0 |
| GTAATCTAGGATTTA-1  | 1875084 | 24057  | 201154 | 160999  | 1488874   | 481 | 0.043457073 | 4.5264354   | 3.073400455 | 0.090837347 | 0.090647063  | 0 |
| GTAATCTAATTTGGG-1  | 1351348 | 31057  | 146734 | 1058277 | 1358467   | 342 | 0.032627933 | 3.287731629 | 3.056245456 | 0.103280723 | 0.103280723  | 0 |
| GTAATCTTGCTGCTCT-1 | 1770066 | 88836  | 174652 | 154685  | 1351893   | 437 | 0.039281815 | 4.1061802   | 3.193944388 | 0.097796014 | 0.096491525  | 0 |
| GTAATCTTGCTGGGTG-1 | 734170  | 20818  | 93043  | 60777   | 609532    | 197 | 0.017853147 | 1.902446067 | 3.033395374 | 0.131273389 | 0.127920299  | 0 |
| GTAATCTCATAGGTCT-1 | 2330920 | 67938  | 242992 | 203999  | 1816991   | 587 | 0.05491338  | 5.367131367 | 2.960373672 | 0.087387284 | 0.08780864   | 0 |
| GTAATCTTCAGAGTGT-1 | 1598848 | 25942  | 173238 | 132186  | 1267482   | 409 | 0.038961082 | 3.8502267   | 2.985837565 | 0.088873686 | 0.097289455  | 0 |
| GTAAGTATGAGCAGGT-1 | 1145490 | 32005  | 145279 | 133466  | 1165740   | 377 | 0.034050153 | 3.573816867 | 2.949467929 | 0.096644917 | 0.095370895  | 0 |
| GTCACAAAGTAAAT-1   | 2453236 | 24743  | 269655 | 212325  | 1945413   | 628 | 0.056755193 | 5.8273346   | 3.08666052  | 0.077679055 | 0.076751249  | 0 |
| GTCACAGTCAAGTGA-1  | 2014432 | 21212  | 221349 | 180384  | 1595487   | 514 | 0.046483077 | 4.835305167 | 3.22633554  | 0.085288719 | 0.085502518  | 0 |
| GTCAGGGGTATGAAG-1  | 1433324 | 26861  | 152281 | 1131468 | 1227714   | 365 | 0.035909049 | 3.464893667 | 3.094852758 | 0.095394308 | 0.097754826  | 0 |
| GTCACAGTCACTGAT-1  | 1775292 | 22176  | 192278 | 144423  | 1416415   | 458 | 0.041329321 | 4.301526767 | 3.031854372 | 0.092895443 | 0.089721     | 0 |
| GTCATTATGGAAGGCC-1 | 1511770 | 18183  | 158730 | 143959  | 1191082   | 385 | 0.03458358  | 3.6389753   | 3.115326974 | 0.09546827  | 0.094547089  | 0 |
| GTCATTCTGCTGCTCT-1 | 1483466 | 35535  | 154085 | 131660  | 1162186   | 375 | 0.031861231 | 3.5679704   | 3.072048075 | 0.103044878 | 0.103044878  | 0 |
| GTCATTTTCTTTATA-1  | 899814  | 14154  | 88075  | 73406   | 714579    | 231 | 0.020837688 | 2.211086267 | 2.9220865   | 0.10121175  | 0.120782399  | 0 |
| GTCCTCAGTCTCTGCT-1 | 1328202 | 30522  | 352233 | 282062  | 2479936   | 828 | 0.021129132 | 2.238332867 | 2.970328903 | 0.10710829  | 0.070112591  | 0 |
| GTCCTCATAGACCT-1   | 1912362 | 23407  | 202198 | 174860  | 1511897   | 488 | 0.044050205 | 4.565550267 | 3.142364467 | 0.080890804 | 0.088991499  | 0 |
| GTCGGGTCAAGCTGCT-1 | 885556  | 25783  | 82545  | 75072   | 697956    | 225 | 0.020338418 | 2.1254484   | 3.060128649 | 0.124289448 | 0.124156093  | 0 |
| GTCCTGTGAGGTAA-1   | 696708  | 32079  | 72905  | 537701  | 146254067 | 174 | 0.051603735 | 1.662614067 | 3.037659073 | 0.139063466 | 0.138186057  | 0 |
| GTCCTGTATCTCCGA-1  | 1540622 | 18202  | 160333 | 134074  | 1223013   | 395 | 0.03546067  | 3.7383638   | 3.138160044 | 0.091928443 | 0.093000884  | 0 |
| GTCCTGTGATCTGCT-1  | 1861646 | 14481  | 188363 | 165302  | 1493500   | 482 | 0.043445378 | 4.52267467  | 3.123795561 | 0.089542089 | 0.088582261  | 0 |
| GTCCTGTCTCAGCGC-1  | 1198802 | 24020  | 103753 | 103753  | 941357    | 304 | 0.027268499 | 2.8934418   | 3.034346458 | 0.10723361  | 0.10700517   | 0 |
| GTCCTGTCTATGCTCT-1 | 2134490 | 48303  | 226083 | 178114  | 1663990   | 538 | 0.048463044 | 5.0273037   | 3.078546007 | 0.086222639 | 0.084601785  | 0 |
| GTCCTGAGGTGCTAG-1  | 905402  | 8112   | 95515  | 77063   | 721712    | 233 | 0.021129132 | 2.238332867 | 3.041302025 | 0.122883327 | 0.122402448  | 0 |
| GTCCTGAGGTGTGGA-1  | 1694516 | 22335  | 182912 | 144661  | 1344708   | 434 | 0.039234418 | 4.103284367 | 3.037305058 | 0.094878938 | 0.092133889  | 0 |
| GTCCTGTGCTGTAGT-1  | 1632334 | 19253  | 176747 | 133880  | 1296454   | 419 | 0.037593473 | 3.9564849   | 3.104583518 | 0.094023561 | 0.094758434  | 0 |
| GTAAGGGGTACTGGA-1  | 1633264 | 28194  | 146827 | 1285127 | 10377955  | 415 | 0.037477955 | 3.924708267 | 3.022338393 | 0.090832477 | 0.091343888  | 0 |
| GTAAGGGCTCTGCTGT-1 | 2115862 | 107611 | 214629 | 180446  | 1611576   | 521 | 0.046828531 | 4.8593122   | 3.112494541 | 0.08871914  | 0.088656693  | 0 |
| GTCAGAGCTGTGAAT-1  | 1792286 | 39896  | 194953 | 152201  | 1405036   | 454 | 0.040969384 | 4.27332303  | 2.976950178 | 0.091532119 | 0.088308962  | 0 |
| GTCAGCAAAAGTATG-1  | 1039452 | 30172  | 110392 | 89023   | 809023    | 261 | 0.021610648 | 2.507327733 | 2.998707616 | 0.114358081 | 0.112205642  | 0 |
| GTCAGCACTCTCACT-1  | 1299494 | 58541  | 138854 | 111451  | 1020848   | 327 | 0.029395232 | 3.098637767 | 3.094415357 | 0.103374494 | 0.103597224  | 0 |
| GTCGATACACTCTAT-1  | 1093226 | 21456  | 120444 | 89034   | 862292    | 279 | 0.025094953 | 2.653809033 | 2.975702435 | 0.11274585  | 0.108489299  | 0 |
| GTCGGGTAGATGCTAG-1 | 1711268 | 52186  | 177364 | 151508  | 1330210   | 430 | 0.03874931  | 4.0702481   | 2.939150906 | 0.093034038 | 0.094529476  | 0 |
| GTCGGGTGATCTGAG-1  | 980174  | 38188  | 101130 | 84829   | 755927    | 244 | 0.022043    |             |             |             |              |   |

|                     |         |        |        |         |          |     |              |             |             |             |             |   |
|---------------------|---------|--------|--------|---------|----------|-----|--------------|-------------|-------------|-------------|-------------|---|
| GTTCAATTCCTECT-1    | 250448  | 86148  | 264900 | 224229  | 1925171  | 622 | 0.05604184   | 5.783205433 | 3.054840062 | 0.079472687 | 0.07939142  | 0 |
| GTTCCGGTCAAGCA-1    | 1619528 | 15864  | 177436 | 135693  | 2290625  | 417 | 0.037657843  | 3.933121167 | 3.114955674 | 0.00089994  | 0.088387705 | 0 |
| GTTCTGGCAACCCAG-1   | 1844272 | 82054  | 191909 | 1420010 | 42912553 | 455 | 0.041003255  | 4.291251533 | 3.035637164 | 0.087873578 | 0.086646599 | 0 |
| GTTCTCGACGACCA-1    | 2383140 | 63509  | 249735 | 213140  | 1856756  | 600 | 0.05410296   | 5.606783233 | 3.044880357 | 0.080431506 | 0.077218934 | 0 |
| GTTCTCGAGTGTCTG-1   | 1445760 | 43722  | 152310 | 129037  | 1121091  | 262 | 0.032557244  | 3.4017822   | 3.038255607 | 0.02041796  | 0.102041796 | 0 |
| GTTCTCGGTGATGTTG-1  | 1426946 | 21829  | 154751 | 113678  | 113678   | 367 | 0.031140846  | 3.475283267 | 3.140584305 | 0.10095367  | 0.100045999 | 0 |
| GTTCTGTGATGACCA-1   | 1926700 | 34403  | 204839 | 176108  | 1511150  | 488 | 0.044017541  | 4.585549333 | 3.066047787 | 0.08643484  | 0.087836934 | 0 |
| GTTTAAAGTGATTA-1    | 1474894 | 14792  | 160824 | 126010  | 1334243  | 379 | 0.03424198   | 3.591324633 | 3.137368256 | 0.10247823  | 0.101351876 | 0 |
| GTTTCAAGTGGATC-1    | 2129706 | 31555  | 238021 | 196455  | 1673675  | 541 | 0.048740485  | 5.046120867 | 3.139892582 | 0.086724879 | 0.085393309 | 0 |
| GTTTTCAGTGGGTTG-1   | 2294738 | 38806  | 248070 | 208924  | 1789838  | 581 | 0.052448355  | 5.407919867 | 3.030139625 | 0.082791774 | 0.080371898 | 0 |
| GTTTATCATAGATCTG-1  | 1549146 | 109927 | 136771 | 1155101 | 1133147  | 373 | 0.0381524796 | 3.5201264   | 3.133513245 | 0.100205931 | 0.10195152  | 0 |
| TAAACGACGGCTAC-1    | 1606784 | 59255  | 172177 | 138724  | 1236328  | 399 | 0.03594555   | 3.772815167 | 2.786122119 | 0.100407888 | 0.095219047 | 0 |
| TAAACGAGGTAGCCA-1   | 1889505 | 49185  | 205627 | 168819  | 1463985  | 473 | 0.040628081  | 4.459989233 | 3.038975707 | 0.088064812 | 0.080010201 | 0 |
| TAAACGTCCAAAGGA-1   | 2052240 | 21689  | 222509 | 180116  | 1627926  | 526 | 0.047570188  | 4.944835367 | 2.973779552 | 0.085991536 | 0.082768288 | 0 |
| TAGAGACGAGCGTAC-1   | 2021510 | 30838  | 207135 | 185908  | 1597629  | 516 | 0.046612458  | 4.88648696  | 3.114361211 | 0.087556081 | 0.085752913 | 0 |
| TAGAGACACTCTGTC-1   | 1438134 | 27253  | 123417 | 113345  | 113345   | 336 | 0.031001567  | 3.471796067 | 3.038306609 | 0.102228363 | 0.098373614 | 0 |
| TAGAGAGATGTGTCA-1   | 1709262 | 48093  | 177023 | 152680  | 1331466  | 430 | 0.03885601   | 4.071347267 | 3.046895533 | 0.086601904 | 0.099680864 | 0 |
| TAGAGATGACGGTTA-1   | 1870170 | 18035  | 202464 | 158101  | 1491370  | 482 | 0.041481416  | 4.532251567 | 3.013277543 | 0.092614958 | 0.088445214 | 0 |
| TAGAGGTTCATTGAC-1   | 2005238 | 54013  | 213631 | 176753  | 1560841  | 504 | 0.045468     | 4.733981    | 3.055968055 | 0.084665875 | 0.083150205 | 0 |
| TAGATGACGGGATCTG-1  | 1838360 | 112233 | 183584 | 161008  | 1381353  | 446 | 0.040140794  | 4.197640933 | 3.026109067 | 0.091156818 | 0.089988679 | 0 |
| TAGATGGAGTATAGTT-1  | 1846748 | 54539  | 194761 | 153129  | 1444329  | 467 | 0.040202348  | 4.360207933 | 3.067755798 | 0.089554369 | 0.091194077 | 0 |
| TAGATFCTCGGCTAC-1   | 2548824 | 33163  | 271200 | 227126  | 2017535  | 652 | 0.058840149  | 6.065913733 | 3.097083302 | 0.08068748  | 0.08098519  | 0 |
| TACAGACAGGACGAC-1   | 2457252 | 51836  | 265080 | 215911  | 1924425  | 622 | 0.056110923  | 5.791251167 | 3.153943406 | 0.07861523  | 0.0795881   | 0 |
| TACAGACACTGACGC-1   | 1840308 | 87270  | 191647 | 133138  | 133138   | 449 | 0.040438959  | 4.237664967 | 3.072875241 | 0.089145616 | 0.089145616 | 0 |
| TACAGATCGACACG-1    | 1994292 | 59666  | 212915 | 177214  | 1544407  | 499 | 0.040201029  | 4.688306733 | 3.046338258 | 0.081193028 | 0.082048943 | 0 |
| TACACGATCGGTTAC-1   | 2617154 | 29936  | 283810 | 235621  | 2067787  | 668 | 0.080311595  | 6.189951833 | 2.953940264 | 0.075791921 | 0.075793904 | 0 |
| TACAGATAGTCCGAC-1   | 1579904 | 59124  | 165085 | 137046  | 1212149  | 392 | 0.03811936   | 3.698026433 | 2.903111926 | 0.095695339 | 0.093762183 | 0 |
| TACAGTGTGTAATCTG-1  | 1377138 | 127317 | 133646 | 116511  | 997664   | 322 | 0.028914494  | 3.0519058   | 3.119323818 | 0.102008863 | 0.101485807 | 0 |
| TACAGTGTGCTTAAGT-1  | 1992352 | 36011  | 230619 | 173128  | 1572594  | 508 | 0.045860036  | 4.769469203 | 3.036385886 | 0.084667349 | 0.084667349 | 0 |
| TACCTATAGTAGGTG-1   | 1772526 | 43195  | 185705 | 156623  | 1387403  | 448 | 0.040257508  | 4.212752533 | 3.141638492 | 0.093183871 | 0.090590427 | 0 |
| TACCTATTAAGCAAT-1   | 1884048 | 16806  | 205766 | 127576  | 1488900  | 481 | 0.043443777  | 4.5236024   | 3.086331804 | 0.093790943 | 0.092250193 | 0 |
| TACCTATGCAATGTT-1   | 1471908 | 29892  | 159045 | 1157143 | 1157143  | 374 | 0.037121213  | 3.546656267 | 3.021670111 | 0.095727009 | 0.095727009 | 0 |
| TACCTATGTGAACAA-1   | 1627134 | 21265  | 177394 | 140625  | 1287850  | 416 | 0.037556918  | 3.933366733 | 3.011629731 | 0.097503679 | 0.095412319 | 0 |
| TACCTTAAGCTGGGA-1   | 1965718 | 20795  | 212826 | 180607  | 1551490  | 501 | 0.045121203  | 4.710638433 | 2.91538877  | 0.086503626 | 0.086790213 | 0 |
| TACCTTAAGGACGAG-1   | 1813166 | 45494  | 188916 | 160000  | 1430156  | 456 | 0.04113946   | 4.288482167 | 3.034250204 | 0.080006254 | 0.080063781 | 0 |
| TACCTTAAGTAATG-1    | 1447110 | 19203  | 157720 | 118633  | 1150354  | 372 | 0.031577584  | 3.525355633 | 3.130051501 | 0.102142266 | 0.100030167 | 0 |
| TACCTTAAGTCCGAA-1   | 1798922 | 17481  | 198853 | 154623  | 1427365  | 461 | 0.041605488  | 4.3275444   | 2.957821137 | 0.093500743 | 0.08766323  | 0 |
| TACCTATATCAATTT-1   | 1841270 | 18579  | 155135 | 146530  | 146530   | 427 | 0.042781928  | 4.432972867 | 2.957391953 | 0.088339479 | 0.08474174  | 0 |
| TACGGATGATGGAACG-1  | 1543264 | 89785  | 156329 | 134002  | 1163148  | 376 | 0.033824508  | 3.561573533 | 2.972797523 | 0.102887576 | 0.100850955 | 0 |
| TACGGATAGTGTAGA-1   | 1318328 | 12417  | 121299 | 99383   | 905229   | 292 | 0.02508456   | 2.806755833 | 2.960549677 | 0.109238983 | 0.110200909 | 0 |
| TACGGATCAACCCGCT-1  | 1280980 | 23555  | 132893 | 119139  | 1005393  | 325 | 0.02924132   | 3.050272823 | 2.979622856 | 0.104494799 | 0.104209962 | 0 |
| TACGGATGACGAGCAT-1  | 2638116 | 37968  | 284234 | 235997  | 2099917  | 678 | 0.06131188   | 6.292788933 | 3.037294613 | 0.076025963 | 0.075843835 | 0 |
| TACGGATCATCGTTCT-1  | 2062042 | 34193  | 214906 | 1632270 | 1423493  | 527 | 0.042342493  | 4.8044653   | 3.076870047 | 0.10770914  | 0.103634728 | 1 |
| TACGGATGTATGTTCT-1  | 2629786 | 57253  | 279746 | 229188  | 2063399  | 667 | 0.05976055   | 6.059465633 | 3.129416884 | 0.078311364 | 0.080272963 | 0 |
| TACGGATTAAGCCGCT-1  | 1825626 | 16398  | 192748 | 168876  | 1447004  | 468 | 0.042191896  | 4.408129233 | 3.106367684 | 0.090289162 | 0.090289162 | 0 |
| TACGGATTAACACGCG-1  | 1225208 | 124422 | 106882 | 917235  | 917235   | 296 | 0.025080608  | 2.8251283   | 2.98828752  | 0.11255635  | 0.112789928 | 0 |
| TACGGGAGTAAGTATT-1  | 1748176 | 40338  | 184325 | 150730  | 1372783  | 443 | 0.039992115  | 4.161673163 | 3.14508556  | 0.091602189 | 0.090903422 | 0 |
| TACGGGGGTACTTCTT-1  | 1383566 | 91090  | 186033 | 156396  | 1385407  | 447 | 0.040334224  | 4.194349767 | 3.059060506 | 0.093328711 | 0.092352899 | 0 |
| TACGGGTAGAACAATC-1  | 2295326 | 40184  | 253628 | 216884  | 1884420  | 609 | 0.054874112  | 5.6413592   | 3.076547727 | 0.085404623 | 0.084261454 | 0 |
| TACGGTAAGTTCCTCT-1  | 2008894 | 34502  | 214339 | 184723  | 1575330  | 509 | 0.045894132  | 4.765208333 | 2.91291624  | 0.090336247 | 0.089275258 | 0 |
| TACGGATGATCTTCTC-1  | 1888622 | 90951  | 223078 | 199169  | 1675424  | 541 | 0.048630725  | 5.028906167 | 3.151155648 | 0.087836053 | 0.088980937 | 0 |
| TACGATATCTGTGGG-1   | 2254158 | 32351  | 238433 | 200106  | 1783068  | 576 | 0.052009543  | 5.391689933 | 3.046800894 | 0.08089965  | 0.081305074 | 0 |
| TACTCTATGAACAATC-1  | 1908910 | 21588  | 208637 | 174814  | 1508871  | 487 | 0.043997999  | 4.566369267 | 3.111281581 | 0.08930236  | 0.089589834 | 0 |
| TACTCTATAGAAGTGA-1  | 2744076 | 18788  | 297741 | 219775  | 2207772  | 713 | 0.046471305  | 6.616008167 | 2.725081905 | 0.110480104 | 0.111082072 | 1 |
| TACTCTATAGGATGTT-1  | 1899894 | 12973  | 207588 | 164557  | 1545496  | 489 | 0.044270956  | 4.593871567 | 3.061652351 | 0.091305594 | 0.086192342 | 0 |
| TACTCTATCAACGCTC-1  | 1529160 | 40457  | 147802 | 1179652 | 1179652  | 381 | 0.034354423  | 3.613087333 | 3.018038235 | 0.09930974  | 0.097187797 | 0 |
| TACTCGAGGAAGGTGA-1  | 1807448 | 15870  | 198421 | 158835  | 1434312  | 463 | 0.04188882   | 4.381454523 | 3.055011201 | 0.092710822 | 0.090959921 | 0 |
| TACTCGAGGACGAAA-1   | 1696788 | 11323  | 187001 | 142709  | 1355755  | 438 | 0.039641256  | 4.1196034   | 3.253701932 | 0.130680165 | 0.130680165 | 1 |
| TACTCGCATGATGCTC-1  | 2694362 | 67691  | 286408 | 232616  | 2102616  | 679 | 0.060945835  | 6.1905062   | 2.920795619 | 0.082892306 | 0.082892306 | 0 |
| TACTCGCTCAAGATTA-1  | 1660308 | 958    | 184221 | 138339  | 1327390  | 429 | 0.038806552  | 4.051344067 | 2.973355234 | 0.096613646 | 0.091560813 | 0 |
| TACTGTATGTGGGTAC-1  | 2342126 | 50090  | 242355 | 206085  | 1843396  | 596 | 0.053615955  | 5.5212529   | 3.072042957 | 0.084584144 | 0.082268447 | 0 |
| TACTGTATGACAGAG-1   | 1152354 | 19407  | 124864 | 907533  | 1007530  | 293 | 0.026414836  | 2.7858613   | 3.088120189 | 0.109883986 | 0.109883986 | 0 |
| TACTGTATGATGTTTC-1  | 2327696 | 60061  | 225643 | 193912  | 1758080  | 568 | 0.0510299    | 5.245183333 | 3.0954151   | 0.09375510  | 0.092766627 | 1 |
| TACTGTATGTCGCTGC-1  | 1586448 | 103650 | 159654 | 138337  | 1184807  | 383 | 0.034314209  | 3.6003808   | 3.020198577 | 0.102745888 | 0.101117904 | 0 |
| TACTGTATGTCGGGTG-1  | 1472160 | 24510  | 160267 | 122798  | 1164885  | 376 | 0.032907372  | 3.5579543   | 3.18585045  | 0.096535558 | 0.095476795 | 0 |
| TAGACCAAGCGGCTTC-1  | 2639720 | 51525  | 286484 | 223094  | 2078617  | 671 | 0.060585722  | 6.2118663   | 3.964392388 | 0.132129298 | 0.132129298 | 1 |
| TAGACCAAGCTAGATA-1  | 1448302 | 12233  | 159938 | 118882  | 1157249  | 374 | 0.0375581    | 3.535116533 | 3.122943522 | 0.101020814 | 0.098295996 | 0 |
| TAGACCAACTACAGG-1   | 1388392 | 40812  | 149503 | 120884  | 1077193  | 348 | 0.031385537  | 3.308094767 | 3.035295538 | 0.100293418 | 0.09941708  | 0 |
| TAGACCAATATGCTC-1   | 2362126 | 63280  | 254571 | 209409  | 1834856  | 593 | 0.053045659  | 5.3957752   | 3.142151778 | 0.08738112  | 0.086219694 | 0 |
| TAGACCATCATGAGA-1   | 1735454 | 35589  | 186189 | 151578  | 1362098  | 440 | 0.039643078  | 4.1472061   | 3.017394084 | 0.094200401 | 0.091997755 | 0 |
| TAGAGCATGCTTCAG-1   | 1671676 | 23320  | 178206 | 154165  | 1315985  | 425 | 0.038448005  | 4.016526333 | 3.133997557 | 0.092188778 | 0.090791697 | 0 |
| TAGACCTACGGCTAGGT-1 | 1522574 | 17114  | 164059 | 126466  | 1214855  | 392 | 0.0354429    | 3.709278967 | 3.075013676 | 0.091171922 | 0.091415476 | 0 |
| TAGAGCTACGCTGGT-1   | 1873838 | 53519  | 190033 | 167370  | 1462366  | 473 | 0.040637764  | 4.452796123 | 3.025882336 | 0.09662332  | 0.09662332  | 1 |
| TAGAGCTCATTTGCTA-1  | 1798864 | 52476  | 186267 | 160402  | 1399519  | 472 | 0.040591388  | 4.227031267 | 3.04577002  | 0.091616    |             |   |

|                    |         |        |         |         |         |     |              |             |              |             |             |   |
|--------------------|---------|--------|---------|---------|---------|-----|--------------|-------------|--------------|-------------|-------------|---|
| TAGTTGGTCGAACCG-1  | 978608  | 58920  | 97952   | 87706   | 734430  | 237 | 0.02137209   | 2.285116233 | 3.120054812  | 0.123919355 | 0.123804934 | 0 |
| TATCAGGATCGTAT-1   | 1895928 | 20292  | 208965  | 156337  | 1514334 | 489 | 0.04208812   | 4.57994367  | 3.068984375  | 0.088498242 | 0.08596442  | 0 |
| TATCAGGATGACTGC-1  | 2035486 | 24126  | 229256  | 178225  | 1603829 | 518 | 0.046758622  | 4.853525367 | 3.12536936   | 0.102885559 | 0.100725232 | 1 |
| TATCAGGGTCCAGCC-1  | 1194712 | 78532  | 117765  | 107548  | 890867  | 288 | 0.02588351   | 2.742308967 | 3.020123125  | 0.111512442 | 0.108808232 | 0 |
| TATCAGGGTTGCTAC-1  | 2123216 | 24665  | 225122  | 188592  | 1690427 | 546 | 0.049316387  | 5.120236267 | 2.989728655  | 0.087162389 | 0.08686262  | 0 |
| TATCAGGTTCTGGTAG-1 | 1484660 | 20849  | 119410  | 129624  | 1174777 | 379 | 0.034393066  | 3.600746067 | 3.061210141  | 0.0978681   | 0.098157159 | 0 |
| TATCAGGTTCTTGTA-1  | 1070870 | 12394  | 115449  | 94067   | 848960  | 274 | 0.0247734    | 2.62885433  | 3.114960888  | 0.112447566 | 0.112188901 | 0 |
| TATCAAGTCACTGGGT-1 | 1943192 | 18108  | 211125  | 160154  | 1477805 | 500 | 0.045228185  | 4.700175433 | 3.026383837  | 0.088079902 | 0.088749325 | 0 |
| TATCTCAGTAGTGG-1   | 1987226 | 47552  | 230026  | 176405  | 1553243 | 502 | 0.045205922  | 4.708531567 | 3.03515428   | 0.086128461 | 0.085422099 | 0 |
| TATCTCAGTCCGAAG-1  | 1132400 | 16196  | 144456  | 113894  | 1052054 | 340 | 0.03068444   | 3.2394976   | 3.208025283  | 0.102858496 | 0.100544042 | 0 |
| TATCTCAGTGAACCA-1  | 2399688 | 35833  | 220159  | 1888466 | 1888466 | 610 | 0.055107937  | 5.696481633 | 3.106460944  | 0.079152825 | 0.079161681 | 0 |
| TATGCCAGGGCTTGA-1  | 1193432 | 8955   | 128593  | 108072  | 947812  | 306 | 0.027686248  | 2.95516897  | 3.145415936  | 0.104360195 | 0.103989722 | 0 |
| TATGCCCTCAGAAC-1   | 2112920 | 57842  | 272612  | 192240  | 1646426 | 532 | 0.047852412  | 4.951597223 | 3.033172504  | 0.087327155 | 0.087736099 | 0 |
| TATTTACAGCCAGGAT-1 | 2357222 | 31999  | 254160  | 201168  | 1870295 | 604 | 0.054578677  | 5.602899433 | 3.215561034  | 0.07885708  | 0.07885708  | 0 |
| TATTTAGCTGCTATGT-1 | 1068362 | 14236  | 136007  | 81020   | 857099  | 277 | 0.020501176  | 2.639855933 | 3.036026249  | 0.113779209 | 0.114407409 | 0 |
| TCAAGCAAGCAOAT-1   | 1514202 | 40925  | 163230  | 126395  | 1183652 | 382 | 0.03452396   | 3.6203861   | 3.006497443  | 0.09608912  | 0.098131516 | 0 |
| TCAAGCAAGTGCAC-1   | 2731640 | 55908  | 295631  | 239785  | 2140316 | 691 | 0.062323655  | 6.380106233 | 3.261517586  | 0.101217011 | 0.101217011 | 1 |
| TCAAGCAAGGCTCTC-1  | 2137576 | 15402  | 219367  | 212945  | 1868262 | 604 | 0.05400182   | 5.638611933 | 3.142790149  | 0.078940415 | 0.077401796 | 0 |
| TCAAGACTTCTTCGG-1  | 1006886 | 87701  | 99567   | 733131  | 686887  | 237 | 0.024129752  | 2.46588063  | 3.000205948  | 0.124325758 | 0.124325758 | 0 |
| TCAAGACTTTCAT-1    | 2428758 | 33245  | 268139  | 218792  | 1908582 | 617 | 0.055739015  | 5.735632467 | 3.100528048  | 0.079620771 | 0.079616424 | 0 |
| TCAAGACTCAACTC-1   | 1883808 | 59643  | 230888  | 170401  | 1452876 | 469 | 0.0421276497 | 4.414824923 | 3.03380994   | 0.088802474 | 0.090075376 | 0 |
| TCAAGAGTGTCAAC-1   | 2385080 | 20024  | 267184  | 204313  | 1893559 | 612 | 0.05527542   | 5.6887297   | 3.027020308  | 0.076683933 | 0.076646573 | 0 |
| TCAAGTAGAGCCCA-1   | 1782712 | 12819  | 119261  | 1416525 | 1416525 | 458 | 0.041356747  | 4.325691467 | 3.110492292  | 0.090396302 | 0.089239886 | 0 |
| TCAAGTCTCGATACA-1  | 2234366 | 32645  | 242764  | 200099  | 1758948 | 568 | 0.051348646  | 5.31133818  | 3.060627371  | 0.082464713 | 0.082246677 | 0 |
| TCAAGAGTAGTGG-1    | 1717858 | 69067  | 180703  | 149643  | 1218445 | 426 | 0.038298375  | 4.012314867 | 3.17336828   | 0.08020446  | 0.08020351  | 0 |
| TCAAGCAAGTTTTCA-1  | 2142000 | 13022  | 234487  | 188049  | 1686442 | 545 | 0.049281704  | 5.1203846   | 3.038899274  | 0.089646075 | 0.080210651 | 0 |
| TCAAGCAAGTTGGTAG-1 | 1805496 | 23764  | 136611  | 1430679 | 1430679 | 462 | 0.041852428  | 4.365999    | 3.049341498  | 0.084821508 | 0.085821669 | 0 |
| TCAAGCTAGTTGCTG-1  | 2409122 | 39697  | 259176  | 217743  | 1892306 | 611 | 0.055219606  | 5.701687033 | 3.022730663  | 0.078378422 | 0.078378422 | 0 |
| TCAAGATTAGAGGC-1   | 1880788 | 73172  | 198775  | 162177  | 1455466 | 470 | 0.042325748  | 4.44177091  | 3.23887997   | 0.111427382 | 0.111312107 | 1 |
| TCAAGATTGGGTCAC-1  | 2536316 | 35436  | 267269  | 229468  | 2004143 | 647 | 0.058426383  | 6.009321133 | 2.941340703  | 0.077788918 | 0.077788918 | 0 |
| TCAAGTAGTACAA-1    | 1369112 | 11427  | 151520  | 116138  | 1089827 | 332 | 0.03180681   | 3.352566733 | 3.095461292  | 0.104877998 | 0.101074052 | 0 |
| TCAAGTACATGACT-1   | 1784354 | 87745  | 185048  | 153143  | 1358418 | 439 | 0.039373614  | 4.099629967 | 3.1193308615 | 0.091695668 | 0.092316008 | 0 |
| TCAAGTATCAAGTCT-1  | 2482404 | 74659  | 261254  | 221828  | 1924863 | 622 | 0.056058553  | 5.784880607 | 3.167309918  | 0.079709086 | 0.079301662 | 0 |
| TATATCAGCCAGTTT-1  | 1449460 | 59268  | 154061  | 119913  | 1116218 | 361 | 0.032456195  | 3.402645067 | 3.072161008  | 0.099878446 | 0.100094104 | 0 |
| TATATCAGACAGACCC-1 | 1703842 | 69008  | 177942  | 154422  | 1330570 | 423 | 0.038107208  | 3.9988063   | 3.030478051  | 0.093693184 | 0.094431549 | 0 |
| TATATCATTCAGTG-1   | 1093652 | 11949  | 121086  | 85014   | 875603  | 283 | 0.025496159  | 2.674225433 | 2.993075825  | 0.115183704 | 0.110648578 | 0 |
| TATATCTCTCCAC-1    | 2153296 | 53154  | 229852  | 189234  | 1681056 | 543 | 0.048962721  | 5.075311633 | 3.05969636   | 0.082729944 | 0.083647312 | 0 |
| TATTATTAGTAGCGA-1  | 1970502 | 123363 | 1562949 | 1562949 | 1562949 | 505 | 0.05527542   | 4.751489233 | 3.107867371  | 0.080203524 | 0.080203524 | 0 |
| TATTATTAGTCTGTA-1  | 1454064 | 32327  | 158614  | 119732  | 1162481 | 376 | 0.039191925  | 3.557725567 | 3.079127466  | 0.104366262 | 0.099789953 | 0 |
| TCCAACCAAGCAAGC-1  | 1987206 | 41680  | 213393  | 1550734 | 1550734 | 501 | 0.056166804  | 4.695992267 | 2.93807359   | 0.086718991 | 0.08713187  | 0 |
| TCCAAGCTGCTCGAC-1  | 1279132 | 49309  | 133570  | 120258  | 975995  | 315 | 0.038389309  | 3.0005559   | 3.06282187   | 0.109443716 | 0.109236904 | 0 |
| TCCAACCTCCAGCG-1   | 1622302 | 27952  | 174283  | 146153  | 1274114 | 412 | 0.037075865  | 3.886508867 | 3.168780058  | 0.089282531 | 0.091521986 | 0 |
| TCCCAATAGAACTGTA-1 | 1734460 | 11802  | 186425  | 1368717 | 1368717 | 442 | 0.041925267  | 4.179425267 | 3.309900273  | 0.088813272 | 0.088697814 | 0 |
| TCCCAATAGTCTGATG-1 | 1560746 | 16818  | 170267  | 129241  | 1244420 | 402 | 0.036354768  | 3.811432933 | 3.140919811  | 0.092670414 | 0.093716336 | 0 |
| TCCCATGTGTAAGTAG-1 | 1467288 | 14425  | 161276  | 117597  | 1173990 | 379 | 0.034368288  | 3.601870367 | 3.107809781  | 0.10321635  | 0.097994892 | 0 |
| TGAGAGCAGATCTGTT-1 | 2022518 | 20861  | 175609  | 1605264 | 1605264 | 519 | 0.046851795  | 4.868547367 | 3.020345967  | 0.08244857  | 0.082337718 | 0 |
| TGAGAGCACCAGAAC-1  | 1251800 | 57789  | 119127  | 946314  | 946314  | 312 | 0.028023378  | 2.963238567 | 2.847185729  | 0.100718458 | 0.100651786 | 0 |
| TGAGAGCGAGTGAAT-1  | 1564870 | 31340  | 136508  | 1241852 | 1241852 | 401 | 0.036705995  | 3.787356767 | 2.995987346  | 0.094687357 | 0.095600434 | 0 |
| TGAGAGGCTAAGAGG-1  | 8215370 | 14085  | 84042   | 69321   | 644322  | 215 | 0.039427947  | 2.075786667 | 2.511854971  | 0.120572043 | 0.121557528 | 1 |
| TGCGCAGAGAGTTGCG-1 | 1757016 | 40278  | 170395  | 156789  | 1389554 | 449 | 0.040552641  | 4.247035667 | 2.960811473  | 0.092739676 | 0.091218985 | 0 |
| TGCGCAGAGTGACTTA-1 | 1704922 | 29476  | 168892  | 151277  | 1354277 | 437 | 0.039528013  | 4.1388682   | 3.038847268  | 0.093364152 | 0.093369258 | 0 |
| TGCGCAGGTCAGAA-1   | 918630  | 13371  | 91959   | 78718   | 734582  | 237 | 0.021331567  | 2.2744739   | 3.031315685  | 0.117110944 | 0.116227317 | 0 |
| TGCGAGTCCGCTTGT-1  | 1499842 | 21251  | 157210  | 130860  | 1190521 | 385 | 0.034740065  | 3.646671833 | 3.048385379  | 0.096924028 | 0.096760376 | 0 |
| TGCGAGTCTACGGCG-1  | 869502  | 33313  | 83893   | 675786  | 675786  | 218 | 0.019629586  | 2.0963251   | 2.958857029  | 0.125165223 | 0.125165355 | 0 |
| TGCGGTTAGCTGGGT-1  | 1524144 | 18854  | 150819  | 126856  | 1227615 | 397 | 0.03574705   | 3.74515     | 3.123850865  | 0.092586765 | 0.094887985 | 0 |
| TGCGGTTAGGAGAA-1   | 1245744 | 13566  | 106830  | 1003192 | 1003192 | 324 | 0.017619666  | 3.078576567 | 3.105924284  | 0.102602023 | 0.104752288 | 0 |
| TGCGGTTCACACTCT-1  | 1240408 | 21638  | 113848  | 111291  | 988821  | 319 | 0.038765721  | 3.0411341   | 3.04104659   | 0.102362449 | 0.106729534 | 0 |
| TGCGGTTGTGCGAAA-1  | 1112142 | 9546   | 123767  | 98794   | 880035  | 284 | 0.025655342  | 2.7711949   | 3.114356942  | 0.114966438 | 0.110097855 | 0 |
| TGCGGTTGTCTGGCG-1  | 779442  | 17178  | 73885   | 622177  | 622177  | 201 | 0.018085483  | 1.938495933 | 3.06523937   | 0.127377853 | 0.128619381 | 0 |
| TGCGGTTTCGTTATT-1  | 809016  | 33189  | 78846   | 59682   | 637299  | 206 | 0.018570187  | 1.966083267 | 3.564289214  | 0.180844553 | 0.170914643 | 1 |
| TGCGGACAGTCAAGC-1  | 1443188 | 68911  | 141784  | 125941  | 1106532 | 357 | 0.032192966  | 3.3986331   | 3.106400283  | 0.100921849 | 0.100921849 | 0 |
| TGCGGACGTTCTCAT-1  | 1709586 | 12267  | 177054  | 148644  | 1351621 | 437 | 0.039403176  | 4.115725867 | 3.094161771  | 0.090570369 | 0.090570369 | 0 |
| TGCGGACAGTCAAGG-1  | 815546  | 15420  | 81958   | 66881   | 649587  | 230 | 0.019017113  | 2.020077967 | 3.038223118  | 0.129681172 | 0.124388115 | 0 |
| TGCGTAAGTATACAC-1  | 1902158 | 33803  | 196881  | 169280  | 1502194 | 485 | 0.043679214  | 4.553322667 | 3.015438063  | 0.091583938 | 0.090325061 | 0 |
| TGCGTATCAGAAACA-1  | 1452842 | 30540  | 148245  | 121939  | 1152118 | 372 | 0.036244208  | 3.525642933 | 3.662300089  | 0.100260321 | 0.100260321 | 0 |
| TGTCACCACTCATG-1   | 703032  | 15761  | 65858   | 59422   | 561991  | 182 | 0.016336549  | 1.751279967 | 3.024522428  | 0.134152991 | 0.134152991 | 0 |
| TGTGACCAAGCTTAG-1  | 467408  | 10349  | 43615   | 39923   | 373521  | 121 | 0.010888856  | 1.1791515   | 3.022875399  | 0.158647634 | 0.158647634 | 0 |
| TGTGACGTTGTGAC-1   | 713804  | 12504  | 67684   | 61364   | 572252  | 185 | 0.016717125  | 1.78778     | 3.106399988  | 0.135132332 | 0.134120751 | 0 |
| TGTGAGAGATCCGTA-1  | 757554  | 7956   | 74818   | 67610   | 607070  | 196 | 0.017674093  | 1.8922723   | 3.091573895  | 0.122244439 | 0.130803199 | 0 |
| TGTGATGAGTCTGAG-1  | 1249064 | 18577  | 124440  | 102268  | 1003779 | 324 | 0.02925285   | 3.0885475   | 3.00949837   | 0.103444751 | 0.101620208 | 0 |
| TCTATTGCAAGAAAT-1  | 1550156 | 27309  | 166373  | 136574  | 1229900 | 394 | 0.035554697  | 3.725597367 | 3.170744178  | 0.092663719 | 0.094544823 | 0 |
| TCTATTGCAAGATCG-1  | 1491700 | 63832  | 131109  | 1143810 | 1143810 | 369 | 0.033250082  | 3.506239733 | 3.08438432   | 0.100770089 | 0.099524503 | 0 |
| TCTATTGATCGGTGC-1  | 1463972 | 46563  | 152919  | 133660  | 1130320 | 365 | 0.032846115  | 3.446868723 | 3.09257181   | 0.099286243 | 0.097966923 | 0 |
| TCTATTGGTATTCGA-1  | 1485748 | 41330  | 154350  | 130428  | 1159640 | 375 | 0.03373445   | 3.5473501   |              |             |             |   |

|                    |         |        |        |         |            |             |             |             |             |             |             |   |
|--------------------|---------|--------|--------|---------|------------|-------------|-------------|-------------|-------------|-------------|-------------|---|
| TGAAGAGGATGAGC-1   | 2855072 | 53304  | 308220 | 240430  | 2252118    | 728         | 0.06547785  | 6.63947967  | 1.844582972 | 0.12332143  | 0.123332143 | 1 |
| TGAAAAGAGGTCTCT-1  | 2405202 | 78936  | 253646 | 214812  | 1857808    | 600         | 0.053822853 | 5.535801067 | 3.147028739 | 0.083802708 | 0.083807081 | 0 |
| TGAAAGACACCGTGGA-1 | 1794300 | 29796  | 186658 | 155050  | 1429996    | 459         | 0.04337469  | 4.333697381 | 3.530497381 | 0.128212542 | 0.128212542 | 1 |
| TGACACACGGCACTG-1  | 1445430 | 37622  | 155986 | 124444  | 1127396    | 364         | 0.0328747   | 3.4672824   | 3.037330341 | 0.097228975 | 0.09649809  | 0 |
| TGACACAGCTCTCT-1   | 2436004 | 54856  | 262468 | 226412  | 1874358    | 605         | 0.054573947 | 5.63447267  | 3.071569024 | 0.082352345 | 0.079977711 | 0 |
| TGACGGCAGTTACGGG-1 | 1633352 | 54441  | 175684 | 139920  | 1263507    | 408         | 0.036806702 | 3.857627367 | 3.06038334  | 0.094447921 | 0.094447921 | 0 |
| TGACGGCCAGCAAGCA-1 | 1558486 | 14215  | 170157 | 141599  | 1232515    | 398         | 0.039396443 | 3.7842658   | 3.109346365 | 0.09632907  | 0.097121701 | 1 |
| TGACGGCGTCCGATG-1  | 1356338 | 51445  | 137956 | 110926  | 1050011    | 339         | 0.030513016 | 3.21863867  | 3.033563385 | 0.00831747  | 0.101379799 | 0 |
| TGACGGCGTGAAC-1    | 2175004 | 62230  | 225873 | 200723  | 1681178    | 543         | 0.048974778 | 5.07674667  | 3.038201896 | 0.085646725 | 0.085174394 | 0 |
| TGACTAGGTAGGTTGT-1 | 2330132 | 12885  | 246646 | 197514  | 1833087    | 592         | 0.05151069  | 5.5239914   | 3.073138022 | 0.080051    | 0.08107366  | 0 |
| TGACTAGTCTCGTA-1   | 1821144 | 25080  | 198781 | 1438442 | 1484842    | 465         | 0.041785297 | 4.328979867 | 2.986609668 | 0.0828327   | 0.093590972 | 0 |
| TGACTAGTCGGGCTG-1  | 1650928 | 55814  | 175416 | 143120  | 1276578    | 412         | 0.037234729 | 3.906748567 | 3.037622239 | 0.095529789 | 0.095529789 | 0 |
| TGACTAGTCTCATGTT-1 | 1782004 | 20443  | 198948 | 132022  | 1429721    | 462         | 0.041704368 | 4.320204567 | 3.442000609 | 0.124649058 | 0.124840574 | 1 |
| TGACTTAGTTATTCAC-1 | 2303090 | 33712  | 250247 | 210277  | 1806854    | 584         | 0.05266166  | 5.4429393   | 3.035469758 | 0.078268887 | 0.079297374 | 0 |
| TGACTTAGGAACGGT-1  | 2163340 | 50546  | 234468 | 194196  | 1684130    | 544         | 0.048124199 | 5.0935564   | 3.114092434 | 0.081995572 | 0.081995572 | 0 |
| TGACTTAGTGTTGCA-1  | 1787378 | 15000  | 195578 | 1412306 | 1412306    | 456         | 0.029135461 | 4.2999279   | 2.948745996 | 0.088117964 | 0.088117964 | 0 |
| TGACTTAGTACAGTA-1  | 1181854 | 8987   | 131323 | 96081   | 945463     | 305         | 0.027611339 | 2.930482933 | 3.073625661 | 0.108493702 | 0.107849118 | 0 |
| TGAGAGGAGTGTCACT-1 | 2246190 | 30857  | 239147 | 200185  | 1776001    | 574         | 0.051879822 | 5.3431709   | 3.071426034 | 0.082182112 | 0.079518386 | 0 |
| TGAGAGAGGTCGCAAG-1 | 1274988 | 30185  | 135619 | 1003691 | 1003691    | 324         | 0.028205907 | 3.083825367 | 3.042186091 | 0.102022481 | 0.099510782 | 0 |
| TGAGAGGGTCCGCTAC-1 | 2287218 | 47869  | 232259 | 206250  | 1800840    | 582         | 0.052507691 | 5.420204133 | 3.049968657 | 0.080797919 | 0.080797919 | 0 |
| TGAGAGGTCGCGCG-1   | 1028696 | 109705 | 97781  | 84543   | 726657     | 238         | 0.021444762 | 2.286579267 | 3.098424004 | 0.121248648 | 0.121765367 | 0 |
| TGAGAGTATAGGTTCT-1 | 513730  | 4927   | 54388  | 417465  | 411660     | 133         | 0.021021247 | 1.255569    | 3.096401539 | 0.165979854 | 0.165362042 | 0 |
| TGAGGATCATCGGGCT-1 | 1674960 | 73389  | 173226 | 147939  | 1280406    | 414         | 0.037205671 | 3.8943667   | 3.106671874 | 0.0959866   | 0.096358153 | 0 |
| TGAGGATTTAGTTGG-1  | 1263814 | 18346  | 137911 | 1005642 | 1005642    | 325         | 0.029381168 | 3.05185867  | 2.927811399 | 0.102974575 | 0.105867354 | 0 |
| TGAGCGGAGGATGGT-1  | 2230524 | 18235  | 245149 | 182230  | 1784900    | 577         | 0.052152604 | 5.3259433   | 3.127876002 | 0.081809335 | 0.081618828 | 0 |
| TGAGCGGGTCTGTAT-1  | 1483950 | 18089  | 162847 | 124426  | 1177088    | 380         | 0.034299336 | 3.604278533 | 3.058877011 | 0.08434442  | 0.079729371 | 0 |
| TGAGCGGGTCTCCTAC-1 | 2890360 | 32697  | 246758 | 2259176 | 2259176    | 730         | 0.06574085  | 6.703309767 | 3.142385235 | 0.080508868 | 0.076401185 | 0 |
| TGAGGGACCAATGTT-1  | 1587742 | 19326  | 173797 | 131538  | 1263081    | 408         | 0.038805808 | 3.8497973   | 3.148286002 | 0.092765422 | 0.093065131 | 0 |
| TGATTTCTCAGTATC-1  | 2264360 | 37396  | 247189 | 190991  | 1788584    | 578         | 0.052051663 | 5.3821451   | 3.044897534 | 0.088142788 | 0.082797329 | 0 |
| TGATTTCTCGACACG-1  | 2242330 | 63221  | 240928 | 1743843 | 1743843    | 563         | 0.050884673 | 5.268453367 | 3.077897534 | 0.080692727 | 0.081399508 | 0 |
| TGACAGTAGTACGGGA-1 | 1570974 | 11805  | 168678 | 152865  | 1237626    | 400         | 0.038107073 | 3.799542033 | 3.071863434 | 0.09129586  | 0.093684244 | 0 |
| TGCACTTTCGCGCGA-1  | 2126416 | 17097  | 230974 | 1960232 | 1960232    | 543         | 0.048042675 | 5.087482    | 3.101381408 | 0.089714739 | 0.089540212 | 0 |
| TGCCAAAAGAGGGCT-1  | 2205220 | 33594  | 240866 | 195316  | 1735444    | 561         | 0.050362034 | 5.1986704   | 3.104849996 | 0.084475637 | 0.085388156 | 0 |
| TGCCAAAAGTGTGTC-1  | 2138874 | 48619  | 250360 | 209154  | 1810741    | 585         | 0.05236351  | 5.408093033 | 3.048254496 | 0.082998839 | 0.08339146  | 0 |
| TGCCAAACATCATG-1   | 1539192 | 15428  | 128451 | 922437  | 2834616    | 298         | 0.026889479 | 3.09073673  | 3.09073673  | 0.113927365 | 0.113927365 | 0 |
| TGCCCATAGGATGCT-1  | 2322016 | 26031  | 249902 | 210296  | 1835787    | 593         | 0.053553383 | 5.5353585   | 2.989264654 | 0.082938364 | 0.082350208 | 0 |
| TGCCCATAGGCAATG-1  | 1179806 | 11927  | 132453 | 93052   | 940374     | 304         | 0.027405508 | 2.877125467 | 3.080991087 | 0.110113703 | 0.107881722 | 0 |
| TGCCCATGTACAGGC-1  | 1480952 | 34141  | 157916 | 138183  | 1150712    | 372         | 0.033434594 | 3.527127133 | 3.175128761 | 0.08815268  | 0.099764682 | 0 |
| TGCCCATTCACCAAG-1  | 2280048 | 42613  | 248404 | 199731  | 1788300    | 578         | 0.052184137 | 5.3928318   | 3.138472263 | 0.082602592 | 0.082580424 | 0 |
| TGCCCATAGCAACG-1   | 1356656 | 74585  | 140587 | 114172  | 1027312    | 332         | 0.028980053 | 3.147235967 | 3.114377772 | 0.098688163 | 0.098688163 | 0 |
| TGCCCTAGAACTCCG-1  | 777146  | 95937  | 74855  | 63385   | 542969     | 175         | 0.031791569 | 1.6880025   | 3.173872204 | 0.161906754 | 0.158241636 | 1 |
| TGCCCTAGTGTGATCT-1 | 1975040 | 51457  | 209701 | 171162  | 1542720    | 498         | 0.044757802 | 4.642507733 | 3.070620663 | 0.092431383 | 0.088201743 | 0 |
| TGCCCTAGTGTGTTCT-1 | 1911972 | 58415  | 186818 | 1474303 | 1474303    | 476         | 0.032432963 | 4.372896133 | 3.12513853  | 0.088267159 | 0.090340783 | 0 |
| TGCCCTAGTCTCAGC-1  | 1332094 | 35052  | 145172 | 116857  | 1035013    | 334         | 0.030070314 | 3.175142967 | 2.938426025 | 0.110306522 | 0.104334152 | 0 |
| TGCGCAGAGAGTGATC-1 | 2591744 | 33170  | 276489 | 235836  | 2046249    | 661         | 0.059699311 | 6.130635167 | 2.971792668 | 0.080251685 | 0.080251685 | 0 |
| TGCGCAGAGTACTGTC-1 | 2644076 | 52139  | 288877 | 217996  | 2085064    | 674         | 0.060636132 | 6.220805633 | 4.213382425 | 0.137010351 | 0.137010351 | 1 |
| TGCGGGTCAGACATG-1  | 2046096 | 22868  | 217821 | 161263  | 1644144    | 531         | 0.047909237 | 4.982054316 | 3.073867551 | 0.082229452 | 0.083707994 | 0 |
| TGCGGGTCACTAGTCA-1 | 2727998 | 26392  | 181826 | 156019  | 1358361    | 439         | 0.039451685 | 4.109787033 | 3.096341385 | 0.093834912 | 0.092925299 | 0 |
| TGCGGGTCACTGTAG-1  | 1201460 | 16588  | 127037 | 981239  | 939896     | 310         | 0.027976549 | 2.950293233 | 2.893502936 | 0.110425752 | 0.105812401 | 0 |
| TGCGGGTCTATGTGTG-1 | 1058004 | 18855  | 112879 | 86075   | 840195     | 271         | 0.024440142 | 2.589398733 | 3.142123005 | 0.116078293 | 0.113178676 | 0 |
| TGCGTGTAGATGTGCG-1 | 1740664 | 61939  | 177294 | 1344023 | 1412230867 | 434         | 0.112230867 | 3.003047721 | 3.003047721 | 0.091864    | 0.092656977 | 0 |
| TGCTACCGTACGTCT-1  | 2338412 | 32231  | 251948 | 207502  | 1846731    | 597         | 0.053848683 | 5.557345533 | 3.019380368 | 0.08522223  | 0.081802217 | 0 |
| TGCTACTCTCTGAAC-1  | 2328798 | 57185  | 251701 | 197415  | 1822407    | 589         | 0.053076487 | 5.472549767 | 3.78013005  | 0.133720725 | 0.133720725 | 1 |
| TGCTCTCTCGGAGAGT-1 | 1839180 | 30063  | 204229 | 168862  | 1490286    | 481         | 0.051805021 | 4.5235827   | 3.110624907 | 0.090581256 | 0.087734681 | 0 |
| TGGAAGAGAGGCTTT-1  | 2022638 | 52602  | 236071 | 198834  | 1715131    | 554         | 0.048821263 | 5.1413468   | 3.108028046 | 0.08975809  | 0.087158547 | 0 |
| TGGAAGAGCTCGGGCT-1 | 1888278 | 24496  | 208867 | 1478679 | 1478679    | 478         | 0.04051265  | 4.489836367 | 3.10999936  | 0.088229532 | 0.086696381 | 0 |
| TGGAAGCGTATCAGC-1  | 2579726 | 48930  | 276725 | 215949  | 2038112    | 658         | 0.05941306  | 6.102296423 | 3.923585536 | 0.122668797 | 0.122668797 | 1 |
| TGGAAGCTTCAGCCG-1  | 1099690 | 94206  | 108603 | 92807   | 804074     | 260         | 0.032385061 | 4.491230233 | 3.097826319 | 0.118451133 | 0.114550716 | 0 |
| TGGAAGGCTCAGTGA-1  | 1081622 | 10923  | 92642  | 838898  | 277        | 0.020505342 | 2.6334069   | 3.133451173 | 0.100811049 | 0.103748212 | 0           |   |
| TGGAAGGCTAACGAT-1  | 2429608 | 18020  | 268174 | 215629  | 1927835    | 623         | 0.056254529 | 5.797977733 | 3.037953455 | 0.07844906  | 0.077700931 | 0 |
| TGGAAGAGTCAACAC-1  | 2532074 | 34666  | 269607 | 225037  | 1980864    | 640         | 0.0517571   | 5.954932467 | 3.032124972 | 0.077358669 | 0.079038133 | 0 |
| TGGAAGAGTGTCCGAC-1 | 2057088 | 14844  | 217459 | 190990  | 1595155    | 515         | 0.046428273 | 4.8119747   | 3.074563148 | 0.085187667 | 0.086336798 | 0 |
| TGGAAGAGTCAACCG-1  | 1653480 | 79616  | 170058 | 143265  | 1260541    | 407         | 0.036719662 | 3.854260367 | 3.037306483 | 0.094652758 | 0.095303736 | 0 |
| TGGAAGTCTCGGTTCT-1 | 2697504 | 82272  | 302406 | 230433  | 2098783    | 678         | 0.061026998 | 6.2583796   | 3.107118495 | 0.079939894 | 0.080148024 | 0 |
| TGGCTGAGTAAGTACT-1 | 2488488 | 69708  | 265930 | 216674  | 1936176    | 625         | 0.056246496 | 5.834264223 | 3.074756206 | 0.082311399 | 0.078424091 | 0 |
| TGGCTTGGACCGGCT-1  | 1279616 | 48076  | 131238 | 113366  | 989636     | 319         | 0.028682965 | 3.025495233 | 2.999573806 | 0.104871499 | 0.103700837 | 0 |
| TGGCTTGGTGGAGTAG-1 | 1061740 | 17546  | 111502 | 889602  | 7248807    | 287         | 0.026010373 | 3.058616502 | 3.058616502 | 0.120201458 | 0.120201458 | 1 |
| TGGGAAGAGGATAGGA-1 | 1715148 | 19481  | 180949 | 150992  | 1363726    | 441         | 0.039728546 | 4.1606326   | 3.072373984 | 0.092723306 | 0.091157984 | 0 |
| TGGGAAGGAGGTGAC-1  | 2099758 | 49322  | 218925 | 192744  | 1638767    | 529         | 0.047776744 | 4.958985833 | 2.938677436 | 0.089996629 | 0.085231535 | 0 |
| TGGGAAGGTTGTACG-1  | 1753774 | 60578  | 180999 | 151271  | 1360926    | 440         | 0.03961601  | 4.1445208   | 3.016784578 | 0.089780495 | 0.089751218 | 0 |
| TGGGAAGTCACTTAC-1  | 2087938 | 60473  | 221803 | 137378  | 1632284    | 527         | 0.047544771 | 4.9363333   | 3.052657005 | 0.086052078 | 0.084871897 | 0 |
| TGGGCGTAGGCTCAGA-1 | 1803992 | 18247  | 197036 | 161316  | 1427393    | 461         | 0.041678408 | 4.360068333 | 3.051034179 | 0.088221086 | 0.088273144 | 0 |
| TGGGCGTGTCTCTGTC-1 | 2065052 | 30114  | 220357 | 196694  | 1617987    | 523         | 0.047237485 | 4.904889233 | 3.067421535 | 0.086477404 | 0.084236553 | 0 |
| TGGGCGTCTACTGTTT-1 | 1628738 | 45453  | 173929 | 136418  | 127        |             |             |             |             |             |             |   |

|                    |         |        |        |         |          |     |             |             |             |             |             |   |
|--------------------|---------|--------|--------|---------|----------|-----|-------------|-------------|-------------|-------------|-------------|---|
| TTAACTCTCGATGCT-1  | 1474440 | 17808  | 160921 | 120129  | 1175582  | 380 | 0.034241005 | 3.577867233 | 3.147446914 | 0.100643886 | 0.095277836 | 0 |
| TTAGGACAGAGCTGCA-1 | 1595386 | 32558  | 164107 | 147409  | 1251672  | 404 | 0.036456041 | 3.8217652   | 3.094770337 | 0.093285795 | 0.091285795 | 0 |
| TTAGGACAGTACCCA-1  | 1550908 | 27499  | 166178 | 136792  | 1220439  | 394 | 0.03558407  | 3.7387442   | 2.949386581 | 0.093831592 | 0.093504739 | 0 |
| TTAGGACTTGAAGTC-1  | 1979764 | 52024  | 210974 | 170108  | 1546458  | 500 | 0.048987534 | 4.677815067 | 3.243281833 | 0.087948562 | 0.087308485 | 0 |
| TTAGGCAGGTAGTGT-1  | 1838286 | 41598  | 159828 | 158875  | 1444075  | 466 | 0.043963425 | 4.3667553   | 3.143747572 | 0.094747524 | 0.09505259  | 0 |
| TTAGGCACCAATGT-1   | 1609096 | 18028  | 182100 | 132665  | 1326303  | 428 | 0.038691834 | 4.0332062   | 2.989678345 | 0.095402005 | 0.092476229 | 0 |
| TTAGGAGTAACGACG-1  | 1430648 | 83201  | 143746 | 126740  | 1066961  | 345 | 0.031034127 | 3.280582533 | 2.704069093 | 0.086312458 | 0.099365881 | 0 |
| TTAGTCTAGGCCACA-1  | 2118102 | 24470  | 194245 | 1673125 | 1573305  | 541 | 0.048824728 | 5.066397933 | 3.039220143 | 0.086361542 | 0.084610171 | 0 |
| TTATGCTAGTGCATT-1  | 2088700 | 24895  | 234114 | 181109  | 1616982  | 536 | 0.048367567 | 5.005697033 | 3.06885146  | 0.086927404 | 0.083263099 | 0 |
| TTATGCTCAGAGCGT-1  | 1789210 | 22113  | 188081 | 170208  | 1430388  | 455 | 0.041107791 | 4.2963247   | 3.123150954 | 0.090509279 | 0.090509279 | 0 |
| TTCCGAGGAGGCGTT-1  | 3410494 | 50339  | 297977 | 2690780 | 2371398  | 869 | 0.078588861 | 7.989324733 | 3.025966737 | 0.064819593 | 0.063545584 | 0 |
| TTCCGACAGGATCTA-1  | 2170762 | 31556  | 238421 | 187736  | 1713049  | 553 | 0.049962953 | 5.174475    | 3.080588214 | 0.082286245 | 0.083176806 | 0 |
| TTCCGAGGATGTGT-1   | 2169404 | 32642  | 252997 | 181872  | 1801893  | 582 | 0.052489089 | 5.405550293 | 3.619627167 | 0.128562063 | 0.128562063 | 1 |
| TTCCGAGTGTCTCG-1   | 1518232 | 59726  | 160765 | 133601  | 1164140  | 376 | 0.033947829 | 3.568523767 | 3.110572059 | 0.096483092 | 0.096893851 | 0 |
| TTCCGAGTCCGCTTA-1  | 1558652 | 26935  | 167826 | 136977  | 1226914  | 396 | 0.038307866 | 3.757928467 | 3.029722212 | 0.002214809 | 0.095940733 | 0 |
| TTGGAAGGTACTCG-1   | 1097584 | 78473  | 109463 | 93208   | 816440   | 264 | 0.023725873 | 2.529146867 | 3.142756906 | 0.113221435 | 0.11568395  | 0 |
| TTGGGTAGGATGAC-1   | 2026556 | 32170  | 219239 | 180082  | 1595065  | 515 | 0.046512354 | 4.828305467 | 2.932493945 | 0.084211565 | 0.084915579 | 0 |
| TTGGTCTAGTAATG-1   | 1058934 | 20657  | 134151 | 87909   | 836217   | 270 | 0.024396762 | 2.5830278   | 3.032521942 | 0.112688425 | 0.112819575 | 0 |
| TTGGTCTCACTGAGT-1  | 1611112 | 16542  | 132313 | 1284227 | 1378030  | 415 | 0.037518991 | 3.914983    | 3.032017899 | 0.09532526  | 0.094131156 | 0 |
| TTGGTCTCATAGGACT-1 | 2238462 | 72314  | 230292 | 199512  | 1730344  | 559 | 0.050349712 | 5.222405433 | 3.144026198 | 0.084785477 | 0.083641909 | 0 |
| TTCTCAAGAGGTAGA-1  | 1694298 | 8195   | 183875 | 153921  | 1248307  | 436 | 0.039395826 | 4.124490423 | 2.99416189  | 0.090071562 | 0.088822567 | 0 |
| TTCTCAAGCAGAGA-1   | 1574894 | 10153  | 173968 | 135173  | 1255600  | 406 | 0.03661971  | 3.831094067 | 3.135648122 | 0.09459762  | 0.094595036 | 0 |
| TTCTCAAGGTACTCT-1  | 2022298 | 55001  | 214907 | 181782  | 1560068  | 504 | 0.045334068 | 4.6965471   | 2.984026194 | 0.092827694 | 0.090940493 | 0 |
| TTCTCAAGTCTGCT-1   | 888010  | 46345  | 60770  | 84420   | 696475   | 225 | 0.020109962 | 2.154067733 | 3.029495509 | 0.125338574 | 0.125338574 | 0 |
| TTCTACAGTCACTGT-1  | 1707524 | 26049  | 182750 | 157019  | 1341706  | 433 | 0.039116385 | 4.08085133  | 3.027665681 | 0.096551442 | 0.093348527 | 0 |
| TTCTACATCTACTGCT-1 | 1930458 | 67259  | 205417 | 166940  | 1474842  | 476 | 0.042703041 | 4.477946733 | 3.107831993 | 0.093005523 | 0.09022728  | 0 |
| TTCTCAAGGACATG-1   | 1189874 | 13237  | 131242 | 951747  | 97648    | 307 | 0.027800827 | 2.9085391   | 3.006988289 | 0.095931362 | 0.104524414 | 0 |
| TTCTCAAGTCTGAG-1   | 1597084 | 22752  | 174803 | 132223  | 1267306  | 409 | 0.038932853 | 3.868071333 | 3.001512935 | 0.100648237 | 0.099097574 | 1 |
| TTCTCAAGTGGGTGT-1  | 2393238 | 30384  | 256764 | 204692  | 1901498  | 614 | 0.055474223 | 5.708763667 | 3.125005515 | 0.08464697  | 0.083251221 | 0 |
| TTCTCAAGTGCCACT-1  | 1674236 | 43391  | 179674 | 142926  | 1308045  | 423 | 0.038256209 | 4.012296967 | 3.000049454 | 0.090301191 | 0.089594098 | 0 |
| TTCTCTAGAGGACAC-1  | 2387694 | 39929  | 253713 | 214503  | 1878549  | 607 | 0.054630064 | 5.605624233 | 3.007757335 | 0.084625981 | 0.082675197 | 0 |
| TTCTCTAGGAGCCT-1   | 1833014 | 42327  | 195156 | 165598  | 1429933  | 462 | 0.041720331 | 4.361396533 | 3.113463028 | 0.090803904 | 0.088598474 | 0 |
| TTCTCTCTATTGTT-1   | 2042080 | 52324  | 219670 | 173413  | 1597283  | 516 | 0.046449137 | 4.8515224   | 3.036506358 | 0.088653452 | 0.087666527 | 0 |
| TTCTCTTCACTCGCG-1  | 1724246 | 41249  | 182606 | 152687  | 1347704  | 435 | 0.039307074 | 4.1129284   | 2.936999955 | 0.093491467 | 0.092637133 | 0 |
| TTCTAGAGTACTGTG-1  | 1836392 | 45713  | 159270 | 1418730 | 1418730  | 458 | 0.041421867 | 4.312421867 | 3.046341481 | 0.094283308 | 0.091475731 | 0 |
| TTGAAGCAGAATTGTG-1 | 1261492 | 19055  | 139620 | 107277  | 995540   | 322 | 0.029050556 | 3.062350367 | 2.991368961 | 0.103773754 | 0.104663631 | 0 |
| TTGAAGCAGGAGCCT-1  | 1932494 | 58414  | 203161 | 178296  | 1410263  | 482 | 0.043510522 | 4.547870567 | 2.984749362 | 0.089137176 | 0.087115229 | 0 |
| TTGAAGAGTGTTCAT-1  | 2427774 | 19803  | 160911 | 221176  | 1922884  | 621 | 0.056135229 | 5.782304967 | 3.103133191 | 0.082195797 | 0.083340915 | 0 |
| TTGACTTGGGCTTCC-1  | 2166276 | 55418  | 230056 | 199682  | 1681120  | 543 | 0.04895468  | 5.007566667 | 3.099070108 | 0.087104504 | 0.084326464 | 0 |
| TTGACTTGTCTGAT-1   | 2157434 | 17831  | 245457 | 177881  | 1720265  | 556 | 0.058012858 | 5.185823533 | 3.115134851 | 0.091242507 | 0.085895761 | 0 |
| TTGGCGTAGAGTATC-1  | 2034858 | 43498  | 216751 | 186412  | 1578197  | 510 | 0.04685224  | 4.744569033 | 3.022962789 | 0.087024323 | 0.087280481 | 0 |
| TTGGCGTAGTGTGTT-1  | 1775716 | 24061  | 188529 | 151571  | 1411555  | 435 | 0.04116602  | 4.278098033 | 3.108176253 | 0.090027017 | 0.089741527 | 0 |
| TTGGCGTGAAGCGGA-1  | 1195024 | 21708  | 124798 | 938551  | 124798   | 308 | 0.027275758 | 3.046110677 | 3.050504883 | 0.107440099 | 0.107440099 | 0 |
| TTGGCGTGTGACTTA-1  | 1392326 | 20664  | 151122 | 119506  | 1101034  | 356 | 0.032064819 | 3.377338067 | 3.011639302 | 0.100595861 | 0.100182464 | 0 |
| TTGGCGTAGAGTAT-1   | 1799076 | 18768  | 191061 | 152468  | 1436779  | 464 | 0.041846457 | 4.347027033 | 3.120625138 | 0.090328045 | 0.088327953 | 0 |
| TTGGGTCTATTGCT-1   | 1728188 | 56945  | 174456 | 153017  | 1343770  | 434 | 0.039125135 | 4.0976749   | 2.886227587 | 0.092326296 | 0.090847506 | 0 |
| TTGGAGTAAGGTGTC-1  | 2068648 | 76586  | 213524 | 181729  | 1596809  | 516 | 0.046451737 | 4.8303182   | 3.097526321 | 0.087408416 | 0.085682804 | 0 |
| TTGGCAATAGTGTGT-1  | 2502470 | 31371  | 274371 | 205370  | 1991358  | 643 | 0.058012858 | 5.947461133 | 3.014485238 | 0.081714822 | 0.080489835 | 0 |
| TTGTAGGAGTACTAT-1  | 1853772 | 16296  | 198373 | 158421  | 1480682  | 478 | 0.043220294 | 4.455245933 | 3.121475882 | 0.090152623 | 0.086523665 | 0 |
| TTGTAGGTTCTTGTGA-1 | 846372  | 8967   | 90600  | 73754   | 673051   | 217 | 0.019675513 | 2.095048733 | 2.967917628 | 0.122608574 | 0.127052684 | 0 |
| TTTACTAGAAACGCC-1  | 1748232 | 57762  | 182000 | 157647  | 1350823  | 436 | 0.039343693 | 4.117528833 | 3.042934852 | 0.092619265 | 0.091344543 | 0 |
| TTTACTGAGGAGACC-1  | 2507462 | 41263  | 269344 | 227167  | 1960988  | 636 | 0.057368802 | 5.902468553 | 3.143568471 | 0.080711903 | 0.081421665 | 0 |
| TTTACTGAGCCDAATT-1 | 791808  | 23315  | 85373  | 59046   | 623914   | 202 | 0.031290932 | 1.942565367 | 3.034131898 | 0.1329755   | 0.12963281  | 0 |
| TTTACTGACCACATA-1  | 1627156 | 12186  | 183064 | 123935  | 1309971  | 423 | 0.038184502 | 3.972668633 | 4.341722325 | 0.142003155 | 0.142288013 | 1 |
| TTTACTGGTAAGATG-1  | 1265020 | 14039  | 138758 | 102365  | 1009858  | 326 | 0.028491219 | 3.0987657   | 3.090294544 | 0.105374723 | 0.103842487 | 0 |
| TTTACTGTCCACGATA-1 | 1630830 | 14013  | 177652 | 133902  | 1285263  | 415 | 0.037522447 | 3.9263845   | 3.047494584 | 0.097954365 | 0.096434892 | 0 |
| TTATGCGATGATATG-1  | 1110412 | 10943  | 120717 | 89115   | 888637   | 287 | 0.028015486 | 2.744050223 | 3.046532123 | 0.111327607 | 0.110267296 | 0 |
| TTTATGCTCTGAGGG-1  | 1640902 | 26590  | 172497 | 144502  | 1297313  | 419 | 0.037880672 | 3.9750998   | 2.951717721 | 0.094170306 | 0.095011192 | 0 |
| TTTCTCAGCTCTCT-1   | 2516606 | 47918  | 232277 | 1963815 | 15916326 | 634 | 0.057211154 | 3.107055909 | 0.08033103  | 0.080579297 | 0.080579297 | 0 |
| TTTCTCTCAACGCC-1   | 1528114 | 78079  | 158612 | 136226  | 1155197  | 373 | 0.033614186 | 3.543141167 | 2.939779998 | 0.098787269 | 0.098787269 | 0 |
| TTTCTCCATAGGA-1    | 1630466 | 39379  | 175684 | 142551  | 1272362  | 411 | 0.037020393 | 3.8811907   | 3.081360021 | 0.101998461 | 0.098930324 | 1 |
| TTTCTCTGCAAGTCT-1  | 2199828 | 81390  | 230726 | 200244  | 1687468  | 545 | 0.048730802 | 4.9934283   | 2.895542324 | 0.093373999 | 0.093373999 | 1 |
| TTTGGCAGTGCATT-1   | 2064206 | 28000  | 217583 | 182083  | 1636540  | 529 | 0.047127934 | 4.935847433 | 3.14365775  | 0.087003648 | 0.086134641 | 0 |
| TTTGGCGCACTCATG-1  | 988010  | 13517  | 106183 | 81906   | 784404   | 253 | 0.022856781 | 2.428664367 | 2.908530435 | 0.118646476 | 0.118646476 | 0 |
| TTTGGCTCGATAGA-1   | 1067886 | 8933   | 115441 | 87614   | 855898   | 276 | 0.024961324 | 2.634296033 | 3.123465744 | 0.115750924 | 0.111389326 | 0 |
| TTTGGCTCTCTACCG-1  | 1469370 | 67617  | 152246 | 129953  | 1119554  | 362 | 0.032602735 | 3.431065867 | 3.005660712 | 0.099645637 | 0.099645637 | 0 |
| TTTGGTCTCAAGACAC-1 | 1678288 | 58039  | 178003 | 149809  | 1250437  | 417 | 0.037571985 | 3.946982167 | 3.077345388 | 0.093458163 | 0.091135887 | 0 |
| TTTGGTGTGATGTTCT-1 | 2501794 | 57366  | 264979 | 225337  | 1954052  | 631 | 0.056596783 | 5.740793067 | 3.098451375 | 0.084508055 | 0.082261345 | 0 |
| TTTGGTTTCAGATGTC-1 | 1517258 | 145646 | 149613 | 127044  | 1094955  | 354 | 0.031717703 | 3.343627867 | 3.133955138 | 0.104922288 | 0.101959238 | 0 |
| TTTGTCAAGTGTGTCA-1 | 2632962 | 41823  | 288490 | 228845  | 2077354  | 671 | 0.060549859 | 6.2191403   | 3.061144741 | 0.079651328 | 0.079530771 | 0 |
| TTTGTATCACTCGCG-1  | 1799810 | 30953  | 190198 | 159556  | 1379303  | 445 | 0.040243654 | 4.208228967 | 2.88560867  | 0.093087254 | 0.091058968 | 0 |

**Supplementary Table 3 | DAPC classification of single cells.** Assignment of each barcode to DAPC defined cluster and group.

| cell_id | barcode            | cluster | group |
|---------|--------------------|---------|-------|
| 0       | AAACCTGAGGCTACGA-1 | 4       | A     |
| 1       | AAACCTGGTCCTTGGG-1 | 4       | A     |
| 2       | AAACCTGTCACACGGC-1 | 9       | D     |
| 3       | AAACCTGTCGATACAC-1 | 11      | D     |
| 4       | AAACGGGAGCAGATCG-1 | 2       | A     |
| 5       | AAACGGGCAAAGTAAC-1 | 1       | A     |
| 6       | AAACGGGCAACCTCAA-1 | 4       | A     |
| 7       | AAACGGGGTCTTCGTC-1 | 8       | D     |
| 8       | AAACGGGTCACGCTCT-1 | 10      | D     |
| 9       | AAACGGGTCAGCGGCT-1 | 11      | D     |
| 10      | AAAGATGAGAATTGTG-1 | 3       | A     |
| 12      | AAAGCAAGTGACACGA-1 | 1       | A     |
| 13      | AAAGCAATCGCGGACT-1 | 5       | A     |
| 14      | AAAGCAATCTCACCTG-1 | 8       | D     |
| 15      | AAAGTAGTCTCAGCGG-1 | 11      | D     |
| 16      | AAAGTAGTCTTGCGAA-1 | 10      | D     |
| 17      | AAATGCCAGTGGAGAA-1 | 11      | D     |
| 18      | AAATGCCGTGCGGCTA-1 | 8       | D     |
| 19      | AACACGTAGGACAGAA-1 | 1       | A     |
| 20      | AACCATGAGGAATCGC-1 | 3       | A     |
| 22      | AACCATGCATTCATCT-1 | 10      | D     |
| 23      | AACCATGTGACGAAG-1  | 8       | D     |
| 24      | AACCGCGGTAACAGCG-1 | 2       | A     |
| 25      | AACCGCGGTTTACTTC-1 | 3       | A     |
| 26      | AACCGCGTCCTACGAA-1 | 2       | A     |
| 27      | AACGTTGGTGGTAACG-1 | 5       | A     |
| 28      | AACTCAGAGTGGGTAC-1 | 7       | C     |
| 29      | AACTCAGAGTGGTAGC-1 | 4       | A     |
| 30      | AACTCAGCATGCAGTT-1 | 10      | D     |
| 31      | AACTCAGTCGAGTATC-1 | 5       | A     |
| 32      | AACTCAGTCTAACACG-1 | 8       | D     |
| 33      | AACTCCCTCAGTTCTT-1 | 10      | D     |
| 34      | AACTCCCTCCACGATA-1 | 11      | D     |
| 35      | AACTCCCTCGATAGGG-1 | 2       | A     |
| 36      | AACTCCCTCTAATGGC-1 | 10      | D     |
| 37      | AACTCTTAGAGTAGCC-1 | 5       | A     |
| 38      | AACTCTTGCTTACCC-1  | 3       | A     |
| 40      | AACTGGTAGAAACCAT-1 | 5       | A     |
| 41      | AACTGGTAGCTGAACG-1 | 11      | D     |

|    |                     |    |   |
|----|---------------------|----|---|
| 42 | AACTGGTAGGGCCATA-1  | 1  | A |
| 43 | AACTGGTGTCGTGAAG-1  | 9  | D |
| 44 | AACTGGTGTTTCAGTAC-1 | 5  | A |
| 45 | AACTGGTTCGTACGCG-1  | 11 | D |
| 46 | AACTTTCCACGTAGGA-1  | 8  | D |
| 47 | AACTTTCTCTGCTGAA-1  | 11 | D |
| 48 | AAGACCTCACAAGCGA-1  | 2  | A |
| 49 | AAGACCTCACCAGTGC-1  | 8  | D |
| 51 | AAGACCTCACTTGAGT-1  | 3  | A |
| 52 | AAGACCTCATAGCACT-1  | 8  | D |
| 53 | AAGACCTGTGGACGTA-1  | 11 | D |
| 54 | AAGACCTTCACGGTAT-1  | 5  | A |
| 55 | AAGACCTTCCGAGATT-1  | 6  | B |
| 56 | AAGCCGCCATCTCACC-1  | 5  | A |
| 57 | AAGGAGCCAAGAATCA-1  | 6  | B |
| 58 | AAGGCAGAGAGCCCAA-1  | 3  | A |
| 59 | AAGGCAGGTAAAGTCA-1  | 5  | A |
| 60 | AAGGTCAGCGTGTGA-1   | 6  | B |
| 61 | AAGGTTCCAGATTGTC-1  | 5  | A |
| 62 | AAGGTTTCGTCCGAATT-1 | 2  | A |
| 63 | AAGGTTTCGTGTAATGA-1 | 9  | D |
| 64 | AAGGTTTCGTTGAGCAG-1 | 8  | D |
| 66 | AAGGTTCTCCGCGACA-1  | 1  | A |
| 67 | AAGTCTGAGGCCCGTT-1  | 8  | D |
| 68 | AAGTCTGAGTGCGATG-1  | 1  | A |
| 69 | AAGTCTGTCACCGCGA-1  | 1  | A |
| 70 | AATCCAGGTTGAACAA-1  | 3  | A |
| 71 | AATCCAGTCGACTGCG-1  | 5  | A |
| 72 | AATCGGTAGAAGGGTA-1  | 4  | A |
| 73 | AATCGGTCAGATGAAT-1  | 11 | D |
| 74 | AATCGGTCATGAATGA-1  | 4  | A |
| 75 | AATCGGTGTGCGCTTG-1  | 4  | A |
| 76 | ACACCAAGTGCAACCC-1  | 1  | A |
| 77 | ACACCCTAGCGTAATA-1  | 9  | D |
| 78 | ACACCCTCAACGCCGT-1  | 8  | D |
| 79 | ACACCGGAGTGTGAAT-1  | 3  | A |
| 80 | ACACCGGTCTGTGGCG-1  | 7  | C |
| 81 | ACACTGAAGACAGGCT-1  | 5  | A |
| 82 | ACACTGAAGCTCTCGG-1  | 10 | D |
| 83 | ACACTGACACAGACCC-1  | 10 | D |
| 84 | ACACTGACAGAGGCTA-1  | 4  | A |
| 85 | ACACTGACAGTTCCGG-1  | 5  | A |

|     |                    |    |   |
|-----|--------------------|----|---|
| 86  | ACAGCCGAGTCTCGTA-1 | 1  | A |
| 88  | ACAGCCGGTTTGGCGC-1 | 4  | A |
| 91  | ACAGCTACAGAACAGC-1 | 8  | D |
| 92  | ACAGCTATCCGAAGCC-1 | 3  | A |
| 93  | ACATACGAGCCGAACA-1 | 8  | D |
| 94  | ACATACGAGGTAACGC-1 | 11 | D |
| 95  | ACATACGAGTTAGGGC-1 | 8  | D |
| 96  | ACATACGCACTCCGAG-1 | 1  | A |
| 97  | ACATACGGTATAAGTG-1 | 9  | D |
| 98  | ACATACGGTCTCTCGT-1 | 6  | B |
| 99  | ACATCAGAGTGTACGG-1 | 11 | D |
| 100 | ACATCAGAGTTAGGGC-1 | 3  | A |
| 101 | ACATGGTTCGAGCACC-1 | 10 | D |
| 102 | ACCAGTAAGATTCACC-1 | 6  | B |
| 103 | ACCAGTAGTGTTACGT-1 | 1  | A |
| 104 | ACCAGTATCGTTCGAA-1 | 8  | D |
| 105 | ACCCACTAGTTATCGC-1 | 3  | A |
| 106 | ACCCACTGTAGGGTGT-1 | 10 | D |
| 107 | ACCGTAACACGTAGGA-1 | 1  | A |
| 108 | ACCGTAACATCTCGTC-1 | 3  | A |
| 109 | ACCTTTAAGTGGGCTA-1 | 3  | A |
| 110 | ACGAGCCGTGCGCTTG-1 | 2  | A |
| 111 | ACGAGGACACCGGCAT-1 | 1  | A |
| 112 | ACGAGGACAGTAGGGT-1 | 5  | A |
| 113 | ACGAGGACATCTCGAA-1 | 4  | A |
| 114 | ACGATACAGAAGATTC-1 | 5  | A |
| 115 | ACGATACCAGCCAAAG-1 | 8  | D |
| 116 | ACGATACCAGTCCCTT-1 | 10 | D |
| 117 | ACGATACTCGAGGTGA-1 | 8  | D |
| 118 | ACGATGTCAACATGGG-1 | 1  | A |
| 119 | ACGATGTGTCATACCA-1 | 1  | A |
| 120 | ACGATGTTCTTCACAT-1 | 5  | A |
| 121 | ACGCAGCGTTACGGCC-1 | 3  | A |
| 122 | ACGCAGCTCCGCTCTA-1 | 11 | D |
| 123 | ACGCCAGCAAGAGAGA-1 | 11 | D |
| 124 | ACGCCAGCAAGGGTGT-1 | 6  | B |
| 125 | ACGCCAGCACAGCTGC-1 | 5  | A |
| 126 | ACGCCAGTCCACCCAT-1 | 5  | A |
| 127 | ACGCCAGTCTCGGAAT-1 | 10 | D |
| 128 | ACGCCGAAGACAAGCC-1 | 7  | C |
| 129 | ACGCCGAAGCAGCCTC-1 | 3  | A |
| 130 | ACGCCGACATGACCGC-1 | 1  | A |

|     |                     |    |   |
|-----|---------------------|----|---|
| 132 | ACGGAGAAGCCGAACA-1  | 8  | D |
| 133 | ACGGAGAGTTGCAGCC-1  | 4  | A |
| 134 | ACGGAGATCGGATCCG-1  | 11 | D |
| 136 | ACGGCCAAGAATGTGT-1  | 10 | D |
| 137 | ACGGCCACAACGAAAT-1  | 1  | A |
| 138 | ACGGCCACACACACGC-1  | 10 | D |
| 139 | ACGGGCTAGTCTAGCT-1  | 10 | D |
| 140 | ACGGGCTCATCGGTCG-1  | 8  | D |
| 141 | ACGGGCTCATGCAGTT-1  | 11 | D |
| 142 | ACGGGCTGTCGTCTTC-1  | 7  | C |
| 143 | ACGGGTCCACGATGGA-1  | 11 | D |
| 144 | ACGGGTCTCGTCCCTA-1  | 2  | A |
| 145 | ACGTCAAAGATGTGGC-1  | 5  | A |
| 146 | ACGTCAAAGGAGCGAG-1  | 5  | A |
| 147 | ACGTCAACATTTGTGG-1  | 1  | A |
| 148 | ACTATCTAGAAGGCCT-1  | 11 | D |
| 149 | ACTATCTAGTACAGTA-1  | 3  | A |
| 150 | ACTATCTCATGGCTAT-1  | 5  | A |
| 152 | ACTATCTTCTCGAACA-1  | 5  | A |
| 153 | ACTATCTTCTGGTAGT-1  | 11 | D |
| 154 | ACTGAACAGCTAAACA-1  | 11 | D |
| 155 | ACTGAACAGTGCGATG-1  | 11 | D |
| 156 | ACTGAACCACGCGATC-1  | 5  | A |
| 157 | ACTGAGTCACGTTTAG-1  | 11 | D |
| 158 | ACTGAGTTCTTCTAAC-1  | 6  | B |
| 159 | ACTGATGCACGACTAT-1  | 10 | D |
| 160 | ACTGATGCATACCAGT-1  | 10 | D |
| 161 | ACTGATGGTACGTCAT-1  | 10 | D |
| 162 | ACTGATGTCGTTTCGTC-1 | 4  | A |
| 163 | ACTGATGTCTTATGGG-1  | 2  | A |
| 164 | ACTGCTCAGATAGCAT-1  | 11 | D |
| 165 | ACTGCTCAGCGCCTTG-1  | 3  | A |
| 166 | ACTGCTCCAATCGTCA-1  | 8  | D |
| 167 | ACTGCTCGTGGAAGA-1   | 3  | A |
| 168 | ACTTACTCACATAAAG-1  | 11 | D |
| 169 | ACTTACTTCCGAGATT-1  | 3  | A |
| 170 | ACTTACTTCTCATGTT-1  | 4  | A |
| 171 | ACTTGTTAGGGTTTCT-1  | 11 | D |
| 172 | ACTTGTTAGTTGTAGA-1  | 11 | D |
| 173 | ACTTGTTGTCTAGGTT-1  | 10 | D |
| 174 | ACTTGTTTCTCAGATG-1  | 3  | A |
| 175 | ACTTGTTTCTGTGGCG-1  | 11 | D |

|     |                     |    |   |
|-----|---------------------|----|---|
| 176 | ACTTTCACAAACGAGC-1  | 1  | A |
| 177 | ACTTTCACACATTTCAG-1 | 11 | D |
| 178 | ACTTTCACAGCGGTCT-1  | 10 | D |
| 179 | ACTTTCAGTAGCAGTG-1  | 3  | A |
| 180 | AGAATAGAGAAAAGCTT-1 | 9  | D |
| 181 | AGAATAGAGTCAAGGC-1  | 3  | A |
| 182 | AGAATAGCAAGCAAGC-1  | 1  | A |
| 183 | AGAATAGGTGAAGCCA-1  | 3  | A |
| 184 | AGACGTTTCCTCAGTC-1  | 5  | A |
| 185 | AGAGCGAAGTCCATAC-1  | 3  | A |
| 186 | AGAGCGACAGTGTGGA-1  | 6  | B |
| 187 | AGAGCGAGTTTGTCTAG-1 | 3  | A |
| 188 | AGAGCGATCCCACGGA-1  | 3  | A |
| 189 | AGAGCGATCGTGCCTT-1  | 4  | A |
| 190 | AGAGCTTAGACGTCGA-1  | 6  | B |
| 191 | AGAGCTTCATTCTTCA-1  | 3  | A |
| 192 | AGAGTGGAGGCATGGT-1  | 8  | D |
| 193 | AGAGTGGCACTACATG-1  | 6  | B |
| 194 | AGAGTGGCATGAAAGT-1  | 8  | D |
| 195 | AGAGTGGGTACAAGGC-1  | 11 | D |
| 196 | AGAGTGGGTCTTCGC-1   | 11 | D |
| 197 | AGATCTGCACCAGTGC-1  | 1  | A |
| 198 | AGATCTGTCTTCTTGA-1  | 11 | D |
| 199 | AGATTGCAGCAAAGTT-1  | 4  | A |
| 200 | AGATTGCCAGAATTCC-1  | 11 | D |
| 201 | AGATTGCCATGATGCT-1  | 10 | D |
| 202 | AGATTGCGTCACCGCA-1  | 2  | A |
| 203 | AGATTGCTCGCGAGAA-1  | 3  | A |
| 204 | AGCAGCCAGGGTCGAT-1  | 7  | C |
| 205 | AGCAGCCAGTGTGATA-1  | 11 | D |
| 206 | AGCAGCCGTTGACGGA-1  | 11 | D |
| 207 | AGCAGCCTCTCATGTT-1  | 8  | D |
| 208 | AGCATACCAGGTACGA-1  | 3  | A |
| 209 | AGCATACCATCATGGT-1  | 3  | A |
| 210 | AGCCTAAAGTAAGTAC-1  | 10 | D |
| 211 | AGCCTAACACGTCATA-1  | 3  | A |
| 212 | AGCCTAAGTCTCTCGT-1  | 3  | A |
| 213 | AGCCTAAGTGTCGCTG-1  | 1  | A |
| 214 | AGCCTAATCCTCATCG-1  | 4  | A |
| 215 | AGCGGTCAGCGTAGTG-1  | 8  | D |
| 216 | AGCGGTCCACAAGCGA-1  | 11 | D |
| 217 | AGCGGTCCAGGCCGTT-1  | 3  | A |

|     |                    |    |   |
|-----|--------------------|----|---|
| 219 | AGCGGTCGTCATCTGA-1 | 6  | B |
| 220 | AGCGGTCTCATCGCCT-1 | 7  | C |
| 221 | AGCGTATAGGCTATCT-1 | 5  | A |
| 222 | AGCGTATCAGTGTGGA-1 | 8  | D |
| 223 | AGCGTCGCACTCACCT-1 | 9  | D |
| 224 | AGCTCCTAGACTTCCA-1 | 3  | A |
| 225 | AGCTCCTAGGATGCGT-1 | 5  | A |
| 226 | AGCTCCTCAGTACCTA-1 | 3  | A |
| 227 | AGCTCCTGTAGTAGTA-1 | 2  | A |
| 228 | AGCTCCTTCGAGTTGT-1 | 8  | D |
| 229 | AGCTCTCAGCCGGTAA-1 | 8  | D |
| 230 | AGCTCTCAGTTAGCGG-1 | 4  | A |
| 231 | AGCTCTCGTACAACGG-1 | 9  | D |
| 232 | AGCTCTCGTACTCCGG-1 | 1  | A |
| 233 | AGCTCTCGTGATTACC-1 | 10 | D |
| 235 | AGCTTGAAGGCCCGTT-1 | 10 | D |
| 238 | AGCTTGAGTCAACTGT-1 | 11 | D |
| 239 | AGGCCACAGATCTGAA-1 | 11 | D |
| 240 | AGGCCACAGTTTGCGT-1 | 3  | A |
| 241 | AGGCCACGTTGGCGTC-1 | 1  | A |
| 242 | AGGCCACTCAAGAGGC-1 | 1  | A |
| 243 | AGGCCACTCCACCGGA-1 | 11 | D |
| 244 | AGGCCACTCTAGCTAG-1 | 2  | A |
| 245 | AGGCCGTAGCACAGGT-1 | 9  | D |
| 246 | AGGCCGTCATAGTGAA-1 | 3  | A |
| 247 | AGGCCGTGTCTAGGTT-1 | 2  | A |
| 248 | AGGCCGTGTCTCTATT-1 | 2  | A |
| 249 | AGGCCGTGTGTGTATC-1 | 1  | A |
| 250 | AGGCCGTTCGTTAGGT-1 | 5  | A |
| 251 | AGGCCGTTCTGCACAA-1 | 1  | A |
| 252 | AGGGAGTTCGCTATGA-1 | 9  | D |
| 253 | AGGGATGAGGCATTGG-1 | 3  | A |
| 254 | AGGGATGCAAATCGCT-1 | 11 | D |
| 255 | AGGGATGGTATAAGTG-1 | 4  | A |
| 256 | AGGGATGTCTGACGCG-1 | 3  | A |
| 257 | AGGGATGTCTGGCCTT-1 | 4  | A |
| 258 | AGGGTGAGTCCTACCT-1 | 3  | A |
| 259 | AGGGTGAGTGACTGAG-1 | 5  | A |
| 260 | AGGTCATAGCCATGCC-1 | 2  | A |
| 262 | AGGTCATAGTGATTGA-1 | 1  | A |
| 263 | AGGTCATCAACATAAG-1 | 1  | A |
| 264 | AGGTCATTCGACAATC-1 | 3  | A |

|     |                     |    |   |
|-----|---------------------|----|---|
| 265 | AGGTCATTCGCGGCAT-1  | 8  | D |
| 266 | AGGTCCGCAGTGTGGA-1  | 2  | A |
| 268 | AGGTCCGTCTCGAGCG-1  | 2  | A |
| 269 | AGTAGTCCAATCGCGC-1  | 11 | D |
| 270 | AGTCTTTAGTCTAGCT-1  | 6  | B |
| 271 | AGTCTTTGTTCCACAA-1  | 11 | D |
| 272 | AGTCTTTTCCGTCTAC-1  | 3  | A |
| 273 | AGTGAGGAGGCATGGT-1  | 6  | B |
| 274 | AGTGAGGCATTCCGAA-1  | 4  | A |
| 275 | AGTGAGGTCTGTATGG-1  | 2  | A |
| 276 | AGTGGGAAGCTGAAAT-1  | 9  | D |
| 277 | AGTGGGAGTCACCAGC-1  | 5  | A |
| 278 | AGTGGGATCTGACGCG-1  | 9  | D |
| 279 | AGTGGGATCTGGGACC-1  | 11 | D |
| 280 | AGTGTCACATGTAGCT-1  | 11 | D |
| 281 | AGTGTCAGTACGTCAT-1  | 10 | D |
| 282 | AGTGTCATCGAGCGTC-1  | 9  | D |
| 283 | AGTTGGTCAAACGAGC-1  | 4  | A |
| 284 | AGTTGGTCACTTCAGA-1  | 4  | A |
| 285 | AGTTGGTGTGTTTCGAT-1 | 10 | D |
| 286 | ATAACGCCAACTGGAG-1  | 6  | B |
| 287 | ATAACGCCACTTTCCG-1  | 11 | D |
| 288 | ATAACGCGTGCCATTA-1  | 2  | A |
| 289 | ATAACGCGTGCTCGAC-1  | 8  | D |
| 290 | ATAACGCTCCACTTCG-1  | 1  | A |
| 291 | ATAAGAGAGCGCCTTG-1  | 1  | A |
| 292 | ATAAGAGAGTAGCCGA-1  | 5  | A |
| 293 | ATAAGAGCAGCGTCAC-1  | 1  | A |
| 294 | ATAAGAGTCCGTGCTT-1  | 11 | D |
| 295 | ATAGACCGTACCGCTG-1  | 2  | A |
| 296 | ATAGACCGTCCGAATT-1  | 1  | A |
| 297 | ATCACGAGTACCTAGT-1  | 8  | D |
| 298 | ATCATCTCATTACGCA-1  | 3  | A |
| 299 | ATCATCTGTGCGAAAC-1  | 7  | C |
| 300 | ATCATGGAGTCCAGGA-1  | 8  | D |
| 301 | ATCCGAACAGCCAAAG-1  | 7  | C |
| 302 | ATCCGAACAGTAATCC-1  | 4  | A |
| 303 | ATCCGAACATTCCGAA-1  | 3  | A |
| 304 | ATCGAGTGTCGGAAGT-1  | 1  | A |
| 305 | ATCGAGTTCTGTGAAC-1  | 10 | D |
| 306 | ATCTACTAGGGATGGG-1  | 10 | D |
| 307 | ATCTACTAGTCACGCC-1  | 3  | A |

|     |                     |    |   |
|-----|---------------------|----|---|
| 308 | ATCTACTAGTTTGCCT-1  | 3  | A |
| 309 | ATCTACTCAGTGCTGC-1  | 4  | A |
| 310 | ATCTGCCCATTCGTTT-1  | 10 | D |
| 311 | ATCTGCCGTCATGCCG-1  | 6  | B |
| 312 | ATCTGCCTCCCGCATT-1  | 3  | A |
| 313 | ATGAGGGAGAGGTAGA-1  | 10 | D |
| 314 | ATGAGGGAGTTTGCCT-1  | 2  | A |
| 315 | ATGAGGGTCCGACCAG-1  | 3  | A |
| 316 | ATGCGATCATTACAGC-1  | 3  | A |
| 317 | ATGCGATGTCAAGTTC-1  | 10 | D |
| 318 | ATGCGATGTGATCCTA-1  | 8  | D |
| 319 | ATGCGATGTTTAGGAA-1  | 8  | D |
| 320 | ATGGGAGAGTCCCACG-1  | 3  | A |
| 321 | ATGGGAGGTACCGTGC-1  | 11 | D |
| 322 | ATGGGAGTCGGAGAGT-1  | 3  | A |
| 323 | ATGGGAGTCTTAAGGC-1  | 11 | D |
| 324 | ATGGGAGTCTTCTAAC-1  | 8  | D |
| 325 | ATGTGTGCAAAGTAAC-1  | 11 | D |
| 326 | ATGTGTGGTCTCGTCT-1  | 11 | D |
| 327 | ATTACTCAGTAATCCC-1  | 3  | A |
| 328 | ATTACTCCACACACGC-1  | 2  | A |
| 330 | ATTACTCGTAAAGTCA-1  | 1  | A |
| 331 | ATTACTCGTAGCGTCC-1  | 11 | D |
| 332 | ATTATCCAGCGATGAC-1  | 3  | A |
| 333 | ATTATCCAGGAGTACC-1  | 10 | D |
| 334 | ATTATCCTCCGATACA-1  | 6  | B |
| 336 | ATTCTACAGCTAAGAT-1  | 6  | B |
| 337 | ATTCTACAGCTATGCT-1  | 5  | A |
| 338 | ATTCTACCAGCGCTTG-1  | 9  | D |
| 339 | ATTCTACGTGGAAAGA-1  | 11 | D |
| 340 | ATTCTACTCTCCCTAG-1  | 11 | D |
| 341 | ATTGGACTCGTAGCGC-1  | 8  | D |
| 342 | ATTGGTGAGGGATACC-1  | 10 | D |
| 343 | ATTGGTGCACTAAGGG-1  | 11 | D |
| 344 | ATTGGTGTCGCCAACG-1  | 11 | D |
| 345 | ATTTCTGAGTAGGTGC-1  | 7  | C |
| 346 | ATTTCTGCACACACGC-1  | 3  | A |
| 347 | ATTTCTGCACTAACTG-1  | 2  | A |
| 348 | ATTTCTGTACACGGC-1   | 6  | B |
| 349 | CAACCAAAGTACGCGA-1  | 1  | A |
| 351 | CAACCAAGTTTCGATAC-1 | 11 | D |
| 352 | CAACCTCAGACTTCCA-1  | 5  | A |

|     |                     |    |   |
|-----|---------------------|----|---|
| 353 | CAACCTCCAAGAACTA-1  | 4  | A |
| 354 | CAACCTCTCAACTGCA-1  | 3  | A |
| 355 | CAACCTCTCTGAAGCT-1  | 4  | A |
| 356 | CAACTAGGTCGTCTTC-1  | 11 | D |
| 358 | CAACTAGTCGACCATA-1  | 1  | A |
| 359 | CAAGAAAAGCAAAGCC-1  | 6  | B |
| 360 | CAAGAAACATAGGACG-1  | 6  | B |
| 361 | CAAGAAAGTTTGTCTT-1  | 3  | A |
| 362 | CAAGAAATCGAACAAA-1  | 3  | A |
| 364 | CAAGATCAGGTGTAA-1   | 6  | B |
| 366 | CAAGATCCATTACGCA-1  | 6  | B |
| 367 | CAAGATCGTGCTTAGT-1  | 4  | A |
| 368 | CAAGATCGTGTTTCGAT-1 | 10 | D |
| 370 | CAAGATCTCACACGTA-1  | 8  | D |
| 371 | CAAGGCCCAAACCCTA-1  | 11 | D |
| 372 | CAAGGCCGTCACCTGG-1  | 3  | A |
| 373 | CAAGTTGTCGCGGCAT-1  | 5  | A |
| 374 | CACAAACCAAGAATCA-1  | 8  | D |
| 375 | CACAAACCAGGCCTTG-1  | 6  | B |
| 376 | CACAAACCATCAAGAA-1  | 2  | A |
| 377 | CACAAACTCGAGAGGT-1  | 5  | A |
| 378 | CACACAAGTACGTTTG-1  | 1  | A |
| 379 | CACACAAGTTGCACTA-1  | 11 | D |
| 380 | CACACCTGTACGTGCC-1  | 10 | D |
| 381 | CACACTCAGACGTGCA-1  | 11 | D |
| 382 | CACACTCAGCGTAGTG-1  | 11 | D |
| 383 | CACACTCGTTAAAGGT-1  | 5  | A |
| 384 | CACACTCTCTACAGTG-1  | 1  | A |
| 386 | CACAGGCCATAGTGTC-1  | 5  | A |
| 387 | CACAGGCGTAGTCTGT-1  | 11 | D |
| 388 | CACAGGCTCCGTCTAC-1  | 7  | C |
| 389 | CACAGTAAGTCGTACT-1  | 5  | A |
| 390 | CACATAGAGGTATCGG-1  | 6  | B |
| 391 | CACATAGAGTCGTCCG-1  | 11 | D |
| 392 | CACATAGCACAACTTG-1  | 9  | D |
| 393 | CACATAGGTACAATAG-1  | 4  | A |
| 394 | CACATAGGTTGGTGAG-1  | 5  | A |
| 395 | CACATAGTCTCAGTTT-1  | 3  | A |
| 396 | CACATTTAGCAGCGTA-1  | 3  | A |
| 397 | CACATTTAGGAATCGC-1  | 3  | A |
| 398 | CACATTTTCATGGAGAC-1 | 1  | A |
| 399 | CACATTTGTCGCTTCT-1  | 10 | D |

|     |                     |    |   |
|-----|---------------------|----|---|
| 400 | CACATTTGTTTCCTGC-1  | 1  | A |
| 401 | CACCACTCATCTAAGC-1  | 3  | A |
| 402 | CACCACTGTCATGTTG-1  | 11 | D |
| 403 | CACCAGGAGACAGTTA-1  | 11 | D |
| 404 | CACCAGGAGGAGTAGA-1  | 2  | A |
| 405 | CACCAGGCAATCTCTT-1  | 11 | D |
| 406 | CACCAGGCACGGCTGT-1  | 11 | D |
| 407 | CACCAGGCATTACTTC-1  | 3  | A |
| 408 | CACCTTGAGGCTCTCG-1  | 11 | D |
| 409 | CACCTTGACAGACACAG-1 | 3  | A |
| 410 | CACCTTGACAGACAGTG-1 | 7  | C |
| 411 | CACCTTGTCGGACGTG-1  | 8  | D |
| 412 | CACTCCAAGCAGACTG-1  | 3  | A |
| 413 | CACTCCAAGTGTCCAT-1  | 10 | D |
| 415 | CAGAATCTCGAAAGGC-1  | 7  | C |
| 416 | CAGAATCTCGGAATGG-1  | 2  | A |
| 417 | CAGAATCTCTACGGGC-1  | 11 | D |
| 418 | CAGAGAGAGTCGTACT-1  | 1  | A |
| 419 | CAGAGAGAGTGAAGAG-1  | 8  | D |
| 420 | CAGAGAGCACGAGCTC-1  | 8  | D |
| 421 | CAGAGAGTCCGAAGCC-1  | 8  | D |
| 422 | CAGAGAGTCCGAGATT-1  | 11 | D |
| 423 | CAGATCAAGAAGGGTA-1  | 6  | B |
| 425 | CAGATCAGTTCTGTCC-1  | 5  | A |
| 426 | CAGCAGCGTTCAAGGG-1  | 8  | D |
| 428 | CAGCAGCTCGCAACGC-1  | 1  | A |
| 429 | CAGCATAAGCGTTGCC-1  | 10 | D |
| 430 | CAGCATACAAACGGGT-1  | 5  | A |
| 431 | CAGCATACACGGAATG-1  | 9  | D |
| 432 | CAGCATAGTCCGCAGT-1  | 10 | D |
| 433 | CAGCCGAAGCGTCAAG-1  | 2  | A |
| 435 | CAGCGACAGCGCCTCA-1  | 8  | D |
| 436 | CAGCGACCAAGTCGGA-1  | 8  | D |
| 437 | CAGCTAATCCACTTCG-1  | 11 | D |
| 438 | CAGCTAATCGAAAGGC-1  | 1  | A |
| 439 | CAGCTGGAGCCACCTG-1  | 2  | A |
| 440 | CAGCTGGGTCTTGGG-1   | 3  | A |
| 441 | CAGCTGGTCACGGTAT-1  | 5  | A |
| 442 | CAGGTGCCAGCATGTT-1  | 11 | D |
| 443 | CAGGTGCTCGAGGTGA-1  | 8  | D |
| 444 | CAGTAACAGACCACGA-1  | 5  | A |
| 445 | CAGTAACAGCACCGCT-1  | 8  | D |

|     |                    |    |   |
|-----|--------------------|----|---|
| 446 | CAGTAACCACACCTAA-1 | 2  | A |
| 447 | CAGTAACCATACGTTG-1 | 11 | D |
| 448 | CAGTCCTAGTCAAGGC-1 | 3  | A |
| 449 | CAGTCCTGTCTTCACC-1 | 5  | A |
| 450 | CATATGGTCTAGACAC-1 | 4  | A |
| 451 | CATATTCCAGTAGAAT-1 | 1  | A |
| 452 | CATATTCGTCGCGCTA-1 | 3  | A |
| 453 | CATATTCGTGACCTGC-1 | 11 | D |
| 454 | CATATTCTCTTGCTTA-1 | 4  | A |
| 455 | CATCAAGTCCTACGAA-1 | 8  | D |
| 456 | CATCAAGTCTAGCCTC-1 | 3  | A |
| 457 | CATCAAGTCTCCATGC-1 | 11 | D |
| 458 | CATCAGAGTTAGTGAA-1 | 5  | A |
| 459 | CATCCACCATTACAGC-1 | 10 | D |
| 460 | CATCCACTCCTGCGTT-1 | 10 | D |
| 461 | CATCCACTCCTTGAAG-1 | 3  | A |
| 462 | CATCGAACAATGGGAC-1 | 4  | A |
| 464 | CATCGAACATTTGTT-1  | 10 | D |
| 465 | CATCGAAGTGCTCGAC-1 | 8  | D |
| 466 | CATCGAAGTTTGGCGC-1 | 4  | A |
| 467 | CATCGGGCACCCAAAT-1 | 10 | D |
| 468 | CATCGGGTCTCAGTTT-1 | 3  | A |
| 469 | CATGACACAACTCGCG-1 | 2  | A |
| 471 | CATGACATCTCCGGAG-1 | 8  | D |
| 472 | CATGCCTGTCCGCAAC-1 | 7  | C |
| 473 | CATGCCTGTTACGGCC-1 | 3  | A |
| 474 | CATGCCTTCATGTGAC-1 | 11 | D |
| 475 | CATGGCGAGATATGGT-1 | 4  | A |
| 476 | CATGGCGCAGTCGGAA-1 | 9  | D |
| 477 | CATGGCGCATTGCGA-1  | 6  | B |
| 478 | CATGGCGTCGAGCACC-1 | 11 | D |
| 479 | CATTATCAGCGTGAAC-1 | 3  | A |
| 480 | CATTATCCAACAGCCC-1 | 10 | D |
| 482 | CATTATCGTAAGAAGG-1 | 9  | D |
| 483 | CATTCGAGCAAATCA-1  | 1  | A |
| 484 | CATTCGCCACGCACGT-1 | 7  | C |
| 485 | CCAATCCGTCAAGCCC-1 | 6  | B |
| 487 | CCACCTAAGCTCCTTC-1 | 10 | D |
| 488 | CCACCTAAGTGGTAGC-1 | 5  | A |
| 490 | CCACCTAGTTCGAGCC-1 | 6  | B |
| 491 | CCACGGAAGACTGTAA-1 | 3  | A |
| 493 | CCACGGACAGAAGACC-1 | 11 | D |

|     |                     |    |   |
|-----|---------------------|----|---|
| 494 | CCACTACAGACAAAGG-1  | 10 | D |
| 496 | CCACTACTCTACGGCG-1  | 2  | A |
| 497 | CCACTACTCTCGGAAT-1  | 10 | D |
| 498 | CCAGCGATCTACAGTG-1  | 2  | A |
| 499 | CCATGTCTCGAGTACT-1  | 5  | A |
| 500 | CCATGTCTCGCTGAAT-1  | 11 | D |
| 501 | CCATTCGAGTGCTGCC-1  | 1  | A |
| 502 | CCATTCGCACATAAAG-1  | 8  | D |
| 503 | CCCAATCGTCGACCAC-1  | 6  | B |
| 504 | CCCAGTTAGCACGCCT-1  | 11 | D |
| 505 | CCCATACAGCCACGTC-1  | 6  | B |
| 506 | CCCATACCAACGAAAT-1  | 6  | B |
| 507 | CCCATACCACAAGCTT-1  | 3  | A |
| 508 | CCCATACCATCTTTCA-1  | 3  | A |
| 510 | CCCTCCTCAGAATTCC-1  | 3  | A |
| 511 | CCCTCCTGTATTCGCA-1  | 8  | D |
| 512 | CCGGGATCACCAATGT-1  | 1  | A |
| 513 | CCGGTAGAGCCAGTTT-1  | 6  | B |
| 514 | CCGGTAGAGCCTATGT-1  | 9  | D |
| 515 | CCGGTAGGTTTCAGTAC-1 | 5  | A |
| 516 | CCGGTAGTCGAGTTGT-1  | 5  | A |
| 517 | CCGGTAGTCGCGATGC-1  | 8  | D |
| 518 | CCGTACTAGGCTCATT-1  | 11 | D |
| 519 | CCGTACTTCGGAGAGT-1  | 6  | B |
| 520 | CCGTGGAAGTAGATGT-1  | 8  | D |
| 521 | CCGTGGACACCAAAGG-1  | 9  | D |
| 522 | CCGTGGACACTGGCCA-1  | 3  | A |
| 523 | CCGTGGAGTCAACCGC-1  | 2  | A |
| 524 | CCGTTCAAGTCGCCGT-1  | 11 | D |
| 525 | CCTAAAGGTACCGTGC-1  | 9  | D |
| 526 | CCTAAAGTCAAGCCGC-1  | 1  | A |
| 527 | CCTACACAGGGATCTG-1  | 2  | A |
| 528 | CCTACACCAACCGCTG-1  | 2  | A |
| 529 | CCTACACGTGGAAGGG-1  | 8  | D |
| 530 | CCTACACTCGCGATGC-1  | 9  | D |
| 531 | CCTACACTCGTTATTC-1  | 11 | D |
| 532 | CCTACACTCTCAGATG-1  | 2  | A |
| 533 | CCTACCATCGGAGAGT-1  | 6  | B |
| 534 | CCTAGCTCAATCCGTA-1  | 1  | A |
| 535 | CCTAGCTTCATGTCAG-1  | 3  | A |
| 536 | CCTAGCTTCTACATGG-1  | 4  | A |
| 537 | CCTATTAAGCCAACAG-1  | 2  | A |

|     |                     |    |   |
|-----|---------------------|----|---|
| 538 | CCTATTACAACAGCCC-1  | 2  | A |
| 539 | CCTATTACACGAGTTT-1  | 8  | D |
| 540 | CCTATTAGTATTCGTG-1  | 3  | A |
| 541 | CCTATTAGTGACCCAC-1  | 7  | C |
| 542 | CCTATTATCGAACCCG-1  | 4  | A |
| 543 | CCTCTGACATGGGCCT-1  | 5  | A |
| 544 | CCTTACGAGTGACTCT-1  | 7  | C |
| 545 | CCTTACGCAAGGTATA-1  | 3  | A |
| 546 | CCTTACGCATACGTTG-1  | 1  | A |
| 547 | CCTTACGTCATCAGCA-1  | 11 | D |
| 548 | CCTTCCCCAACCTGG-1   | 1  | A |
| 549 | CCTTCCCCAACGTCTA-1  | 4  | A |
| 550 | CCTTCCCGTTCAGGTT-1  | 8  | D |
| 551 | CCTTCCCTCGCGGACT-1  | 10 | D |
| 553 | CCTTCGAAGTCGTCCG-1  | 11 | D |
| 554 | CCTTCGATCAGCAGCC-1  | 7  | C |
| 555 | CCTTCGATCAGTACCA-1  | 10 | D |
| 556 | CGAACATAGGCTAGTG-1  | 8  | D |
| 557 | CGAACATGTGACTGAG-1  | 10 | D |
| 558 | CGAACATTCAGTACCA-1  | 7  | C |
| 559 | CGAACATTCTGGGATT-1  | 11 | D |
| 560 | CGAATGTAGTACGACG-1  | 3  | A |
| 561 | CGAATGTCAGACAGTG-1  | 11 | D |
| 562 | CGAATGTCAGCCCATG-1  | 4  | A |
| 563 | CGAATGTGTGTCAACT-1  | 5  | A |
| 564 | CGACCTTAGGGTAACC-1  | 8  | D |
| 565 | CGACCTTAGTGTTTGC-1  | 3  | A |
| 566 | CGACCTTCAGTCGGAA-1  | 3  | A |
| 567 | CGACTTCGTGGTGCAA-1  | 3  | A |
| 568 | CGAGAAGCAAACCTCAC-1 | 10 | D |
| 570 | CGAGCACAGGCGATAC-1  | 3  | A |
| 572 | CGAGCACCAGATATCC-1  | 7  | C |
| 573 | CGAGCACGTCGAGTAG-1  | 9  | D |
| 574 | CGAGCACTCAAGTTGC-1  | 8  | D |
| 575 | CGAGCACTCGGAAGAC-1  | 3  | A |
| 576 | CGAGCACTCTGATCAG-1  | 6  | B |
| 577 | CGAGCCAAGCTGGTCC-1  | 5  | A |
| 579 | CGAGCCACAAGAACTA-1  | 3  | A |
| 580 | CGAGCCACAGACGAGT-1  | 11 | D |
| 581 | CGAGCCACAGGACCAA-1  | 6  | B |
| 582 | CGAGCCACATAGTGAA-1  | 8  | D |
| 583 | CGATCGGGTACCGTGC-1  | 1  | A |

|     |                     |    |   |
|-----|---------------------|----|---|
| 586 | CGATGTAAGATCGGGT-1  | 5  | A |
| 587 | CGATGTACAAGTACAA-1  | 1  | A |
| 588 | CGATGTAGTCGCCAAC-1  | 2  | A |
| 589 | CGATGTATCTCCAGCT-1  | 6  | B |
| 590 | CGATTGAAGCTAGCCC-1  | 11 | D |
| 591 | CGATTGACACCTCCAT-1  | 6  | B |
| 592 | CGATTGAGTAAGAAGG-1  | 2  | A |
| 593 | CGATTGAGTACTCCGG-1  | 3  | A |
| 594 | CGATTGAGTATTCGCA-1  | 2  | A |
| 595 | CGATTGAGTCAACTCA-1  | 1  | A |
| 596 | CGATTGAGTGCATCTA-1  | 1  | A |
| 599 | CGCCAAGAGGCTCAGA-1  | 8  | D |
| 601 | CGCGGTAGTCGGAAGT-1  | 8  | D |
| 602 | CGCGTTTCACAAGCTT-1  | 11 | D |
| 604 | CGCGTTTTCTGGATCA-1  | 8  | D |
| 606 | CGCTATCGTGATTGTC-1  | 1  | A |
| 607 | CGCTATCTCCGGCTAG-1  | 11 | D |
| 608 | CGCTATCTCGACTTCC-1  | 8  | D |
| 609 | CGCTTCACAAGCACGA-1  | 3  | A |
| 610 | CGCTTCACACGAAGGT-1  | 6  | B |
| 611 | CGCTTCAGTTCTAGTG-1  | 1  | A |
| 612 | CGGACACAGACGCTTT-1  | 10 | D |
| 613 | CGGACACGTAGTAGTA-1  | 6  | B |
| 614 | CGGACACGTCTAGGTT-1  | 11 | D |
| 615 | CGGACACTCGAGTTGT-1  | 6  | B |
| 616 | CGGACGTCACCTTGCTC-1 | 2  | A |
| 618 | CGGAGCTAGGCTACGA-1  | 11 | D |
| 619 | CGGAGCTGTCCGAAGA-1  | 11 | D |
| 620 | CGGAGCTTCTAGACAC-1  | 10 | D |
| 621 | CGGAGTCAGAAACCTA-1  | 8  | D |
| 622 | CGGAGTCAGCATGGCA-1  | 9  | D |
| 623 | CGGAGTCAGCCAACAG-1  | 1  | A |
| 624 | CGGAGTCCAGAGGCAT-1  | 5  | A |
| 625 | CGGAGTCCAGCTTGAT-1  | 5  | A |
| 626 | CGGAGTCGTATCAGTC-1  | 8  | D |
| 627 | CGGAGTCGTCTTCACC-1  | 11 | D |
| 628 | CGGCTAGAGACGCACA-1  | 8  | D |
| 629 | CGGCTAGAGTAGCCGA-1  | 11 | D |
| 630 | CGGCTAGAGTAGTATG-1  | 3  | A |
| 631 | CGGCTAGGTGTCAACT-1  | 6  | B |
| 632 | CGGCTAGGTTCTTCGC-1  | 10 | D |
| 633 | CGGCTAGTCATGTGAC-1  | 8  | D |

|     |                    |    |   |
|-----|--------------------|----|---|
| 634 | CGGGTCAGTCATTACG-1 | 3  | A |
| 635 | CGGTAAACACCACATA-1 | 11 | D |
| 636 | CGGTAAACATGGAGAC-1 | 9  | D |
| 637 | CGTAGCGAGGACAGAA-1 | 2  | A |
| 638 | CGTAGCGAGTACGATA-1 | 6  | B |
| 639 | CGTAGCGCAACGGGAT-1 | 3  | A |
| 640 | CGTAGGCAGGCGTTGA-1 | 3  | A |
| 641 | CGTAGGCCACTTGTTT-1 | 3  | A |
| 642 | CGTAGGCCATGAGGGT-1 | 3  | A |
| 644 | CGTCACTAGGCGCTCT-1 | 5  | A |
| 645 | CGTCACTAGTCCCACG-1 | 8  | D |
| 646 | CGTCACTCATTCCGAA-1 | 3  | A |
| 647 | CGTCACTTCGTTACCC-1 | 11 | D |
| 649 | CGTCAGGAGCAGGCTA-1 | 6  | B |
| 650 | CGTCAGGAGGACAGCT-1 | 1  | A |
| 651 | CGTCAGGCACGAGCTC-1 | 11 | D |
| 652 | CGTCCATGTAGATGTA-1 | 3  | A |
| 653 | CGTCCATTCTCCACAC-1 | 3  | A |
| 654 | CGTCTACCAACGACTT-1 | 9  | D |
| 656 | CGTCTACCACAGCTGC-1 | 10 | D |
| 657 | CGTCTACGTGGAGCTA-1 | 8  | D |
| 658 | CGTCTACTCTTAAGGC-1 | 11 | D |
| 659 | CGTGAGCTCGAATGTC-1 | 10 | D |
| 661 | CGTGTAAGTAGGTTTC-1 | 11 | D |
| 662 | CGTGTAAGTTTCCGAA-1 | 1  | A |
| 663 | CGTGTCTCAACCGCTG-1 | 6  | B |
| 664 | CGTGTCTCACAGCTAT-1 | 11 | D |
| 665 | CGTGTCTCATCCATCC-1 | 8  | D |
| 666 | CGTGTCTTCCAACAAC-1 | 6  | B |
| 667 | CGTGTCTTCCGAGTCG-1 | 9  | D |
| 668 | CGTGTCTTCGTTGCAA-1 | 8  | D |
| 670 | CGTTAGAAGGGTAACC-1 | 8  | D |
| 671 | CGTTAGAAGTGGCACA-1 | 3  | A |
| 672 | CGTTAGAGTCATCCAA-1 | 11 | D |
| 673 | CGTTAGATCAGCCTGG-1 | 3  | A |
| 674 | CGTTCTGAGCTGCGAA-1 | 1  | A |
| 675 | CGTTCTGAGGCTAGCA-1 | 4  | A |
| 676 | CGTTCTGGTTGAACAA-1 | 10 | D |
| 677 | CGTTCTGTCTCTAGTT-1 | 11 | D |
| 678 | CGTTGGGAGGCGCTCT-1 | 11 | D |
| 679 | CGTTGGGAGTCCCACG-1 | 5  | A |
| 680 | CTAACTTAGGGATGGG-1 | 10 | D |

|     |                     |    |   |
|-----|---------------------|----|---|
| 681 | CTAACTTGTTGACGGA-1  | 11 | D |
| 682 | CTAACTTTCTTGGCCT-1  | 3  | A |
| 683 | CTAAGACGTGATTGTC-1  | 11 | D |
| 684 | CTAATGGCAACCTGAT-1  | 4  | A |
| 685 | CTACACCAGTTACCCA-1  | 1  | A |
| 686 | CTACACCGTACCGTGC-1  | 8  | D |
| 687 | CTACATTACGAGATG-1   | 8  | D |
| 688 | CTACATTTCAAAGTGA-1  | 3  | A |
| 689 | CTACATTTCACGTTAG-1  | 8  | D |
| 690 | CTACCCACAGTAGGGT-1  | 10 | D |
| 691 | CTACCCAGTAGAACAT-1  | 8  | D |
| 692 | CTACCCAGTATATGAG-1  | 11 | D |
| 693 | CTACGTCGTAGTGGCA-1  | 3  | A |
| 694 | CTAGAGTTCGACAATC-1  | 9  | D |
| 695 | CTAGCCTAGGGATACC-1  | 10 | D |
| 696 | CTAGCCTTCCAACGAT-1  | 6  | B |
| 697 | CTAGCCTTCTCCGGAG-1  | 5  | A |
| 698 | CTAGCCTTCTTGGATG-1  | 3  | A |
| 699 | CTAGCCTTCTTGTC CG-1 | 11 | D |
| 700 | CTAGTGACAGTTTGCA-1  | 7  | C |
| 701 | CTAGTGAGTAGGGTGT-1  | 8  | D |
| 703 | CTCACACCATAGGTCT-1  | 2  | A |
| 704 | CTCACACGTCTCTCTG-1  | 3  | A |
| 705 | CTCACACTCAAGAGGC-1  | 3  | A |
| 706 | CTCAGAACATGGAGAC-1  | 9  | D |
| 707 | CTCAGAATCATGACCA-1  | 3  | A |
| 708 | CTCATTAGTGTTC CGG-1 | 10 | D |
| 710 | CTCATTATCTGATCAG-1  | 5  | A |
| 711 | CTCCTAGAGGAGTACC-1  | 5  | A |
| 712 | CTCCTAGCAAACCGAG-1  | 9  | D |
| 713 | CTCGAAAAGCAGGTCA-1  | 5  | A |
| 714 | CTCGAAACAAGCTACT-1  | 4  | A |
| 715 | CTCGAAACATTTGTGG-1  | 7  | C |
| 716 | CTCGAAATCTACAAGC-1  | 10 | D |
| 717 | CTCGAGGAGCGATATA-1  | 11 | D |
| 718 | CTCGAGGAGTGACATA-1  | 7  | C |
| 719 | CTCGAGGCAACTAGTC-1  | 3  | A |
| 720 | CTCGAGGCAAGAATCA-1  | 1  | A |
| 721 | CTCGAGGCAAGTG TTC-1 | 10 | D |
| 722 | CTCGAGGGTCATGTTG-1  | 6  | B |
| 723 | CTCGGAGAGAGCAATT-1  | 3  | A |
| 724 | CTCGGAGAGCTAACAA-1  | 2  | A |

|     |                    |    |   |
|-----|--------------------|----|---|
| 725 | CTCGGAGTCCACTAAG-1 | 8  | D |
| 726 | CTCGGGAAGTGTTAGA-1 | 8  | D |
| 727 | CTCGGGACAAGGGTGT-1 | 7  | C |
| 728 | CTCGGGATCATATCTC-1 | 5  | A |
| 729 | CTCGTACAGAGCTTCT-1 | 8  | D |
| 730 | CTCGTACAGCTGCGAA-1 | 6  | B |
| 731 | CTCGTACCACGTACAT-1 | 3  | A |
| 732 | CTCGTACCACGTTTAG-1 | 3  | A |
| 733 | CTCGTACCATGCCATA-1 | 2  | A |
| 734 | CTCGTACGTTGCCTCT-1 | 11 | D |
| 735 | CTCGTCAAGCGGCTTC-1 | 3  | A |
| 736 | CTCGTCACAACGACGA-1 | 6  | B |
| 737 | CTCGTCACAAGGTGAC-1 | 4  | A |
| 738 | CTCGTCAGTGTCCCTT-1 | 5  | A |
| 739 | CTCGTCATCACTGCGG-1 | 6  | B |
| 740 | CTCTAATGTATCGCCG-1 | 3  | A |
| 741 | CTCTAATTCATATCTC-1 | 10 | D |
| 742 | CTCTACGAGAAAGTGG-1 | 11 | D |
| 743 | CTCTACGGTGATTGGG-1 | 10 | D |
| 744 | CTGAAGTAGTGATTGA-1 | 9  | D |
| 745 | CTGAAGTCAGACTTGT-1 | 9  | D |
| 746 | CTGAAGTGTAACGGCA-1 | 11 | D |
| 747 | CTGAAGTGCAACCGC-1  | 2  | A |
| 748 | CTGAAGTGCCACAG-1   | 11 | D |
| 749 | CTGAAGTTCGTAGCGC-1 | 8  | D |
| 750 | CTGATAGAGCAGCGTA-1 | 6  | B |
| 751 | CTGATAGCAGCTCATA-1 | 3  | A |
| 752 | CTGATAGTCAGAAACA-1 | 8  | D |
| 753 | CTGATCCGTTCTCAA-1  | 3  | A |
| 754 | CTGCCTAGTGGTCAGA-1 | 11 | D |
| 755 | CTGCCTAGTCCACAA-1  | 7  | C |
| 756 | CTGCCTATCGTAGCGC-1 | 3  | A |
| 757 | CTGCGGAAGAGTGACC-1 | 11 | D |
| 758 | CTGCGGAAGATGTCTC-1 | 10 | D |
| 759 | CTGCGGAAGTTGTCGT-1 | 6  | B |
| 760 | CTGCGGAGTCTCCACT-1 | 11 | D |
| 761 | CTGCGGATCAGAAACA-1 | 6  | B |
| 762 | CTGCGGATCCAAAGAA-1 | 4  | A |
| 763 | CTGCGGATCCCAGAAT-1 | 8  | D |
| 764 | CTGCTGTAGTAGGCCA-1 | 3  | A |
| 765 | CTGCTGTAGTCTCGGC-1 | 1  | A |
| 766 | CTGCTGTCAACATAAG-1 | 3  | A |

|     |                    |    |   |
|-----|--------------------|----|---|
| 767 | CTGGTCTAGCGATATA-1 | 1  | A |
| 768 | CTGGTCTAGGTCGGAT-1 | 6  | B |
| 770 | CTGGTCTTCTCCCTAG-1 | 3  | A |
| 771 | CTGTGCTCAATGGGAC-1 | 3  | A |
| 772 | CTGTGCTCAGACACGA-1 | 1  | A |
| 773 | CTGTGCTCATGGCTCG-1 | 2  | A |
| 774 | CTGTGCTGTGGGCCTT-1 | 3  | A |
| 775 | CTGTTTAAGAGTCTGG-1 | 8  | D |
| 776 | CTGTTTAAGCTGCCCA-1 | 11 | D |
| 777 | CTGTTTAAGGCTATCT-1 | 10 | D |
| 778 | CTGTTTACACGCCTGA-1 | 6  | B |
| 779 | CTGTTTAGTCTCTTTA-1 | 5  | A |
| 780 | CTGTTTATCACCAGCG-1 | 2  | A |
| 781 | CTTAAGTAGCATCTTG-1 | 1  | A |
| 782 | CTTAAGTGTGGAAAGA-1 | 3  | A |
| 783 | CTTAAGTTCCTTGAC-1  | 5  | A |
| 784 | CTTACCGAGGGCTTCC-1 | 6  | B |
| 785 | CTTACCGGTAAGTAAC-1 | 5  | A |
| 786 | CTTACCGGTCACCTGG-1 | 8  | D |
| 787 | CTTACCGGTGCTATTG-1 | 8  | D |
| 788 | CTTACCGTCACACGTA-1 | 8  | D |
| 789 | CTTACCGTCCGCGACA-1 | 4  | A |
| 790 | CTTAGGACACACGCAC-1 | 5  | A |
| 791 | CTTAGGATCTGGGCTG-1 | 11 | D |
| 792 | CTTCTCTAGCTGCCCA-1 | 10 | D |
| 793 | CTTCTCTAGGTCGGAT-1 | 11 | D |
| 794 | CTTCTCTCAATGTAGA-1 | 9  | D |
| 795 | CTTCTCTCAGCTATGT-1 | 11 | D |
| 796 | CTTCTCTCATCGCATA-1 | 2  | A |
| 797 | CTTCTCTTCCTATGAG-1 | 1  | A |
| 798 | CTTGGCTAGACAGAGA-1 | 5  | A |
| 799 | CTTGGCTAGCGCCTTG-1 | 8  | D |
| 800 | CTTGGCTAGTCTCGTA-1 | 2  | A |
| 801 | CTTGGCTGTTCTAGTG-1 | 9  | D |
| 802 | CTTTGCGGTCAAAGCG-1 | 8  | D |
| 803 | CTTTGCGTCCTCAGTC-1 | 4  | A |
| 804 | GAAACTCGTGCGAACA-1 | 11 | D |
| 805 | GAAACTCGTTCGTCOA-1 | 5  | A |
| 806 | GAAACTCTCACGCTCT-1 | 5  | A |
| 807 | GAAACTCTCACGTAGT-1 | 1  | A |
| 808 | GAAACTCTCTGGTGAT-1 | 7  | C |
| 809 | GAAATGAAGGCTCTTA-1 | 9  | D |

|     |                    |    |   |
|-----|--------------------|----|---|
| 810 | GAAATGACACCCTCTA-1 | 5  | A |
| 811 | GAACATCGTACTTGCA-1 | 11 | D |
| 812 | GAACATCTCATGCGCG-1 | 2  | A |
| 813 | GAACCTACAAAGGTTA-1 | 7  | C |
| 814 | GAACCTACAATCGCGC-1 | 1  | A |
| 815 | GAACCTAGTCACATGT-1 | 10 | D |
| 816 | GAACCTAGTCGAGTAG-1 | 4  | A |
| 817 | GAACCTAGTTCGAGCC-1 | 1  | A |
| 818 | GAACGGACACTTGCAA-1 | 11 | D |
| 820 | GAACGGAGTACGTTTG-1 | 6  | B |
| 821 | GAACGGATCTTCACGC-1 | 11 | D |
| 822 | GAAGCAGAGGGAGTAA-1 | 10 | D |
| 823 | GAAGCAGCACACGCAC-1 | 5  | A |
| 824 | GAATAAGAGGCTACGA-1 | 1  | A |
| 825 | GAATAAGCAAATACGA-1 | 8  | D |
| 826 | GAATAAGCAGAGATCG-1 | 6  | B |
| 827 | GAATGAACAACCTGCG-1 | 3  | A |
| 828 | GAATGAATCTTCACAT-1 | 3  | A |
| 829 | GACACGCCAAATGATG-1 | 11 | D |
| 830 | GACAGAGAGCCTAACT-1 | 10 | D |
| 831 | GACAGAGCACAGACCC-1 | 11 | D |
| 832 | GACAGAGCAGTAATCC-1 | 10 | D |
| 833 | GACAGAGCATCGGGCT-1 | 1  | A |
| 834 | GACAGAGTCAGCCCGA-1 | 1  | A |
| 835 | GACAGAGTCCTACGAA-1 | 8  | D |
| 836 | GACAGAGTCCTGCGTT-1 | 7  | C |
| 837 | GACCAATAGACTTTCG-1 | 3  | A |
| 838 | GACCAATAGGACAGAA-1 | 11 | D |
| 839 | GACCAATTCCGGCTAG-1 | 3  | A |
| 840 | GACCTGGGTAGCCCTG-1 | 8  | D |
| 841 | GACGCGTAGTAACCCT-1 | 9  | D |
| 842 | GACGCGTCAGGTCAAG-1 | 9  | D |
| 843 | GACGGCTGTGTAATGA-1 | 2  | A |
| 844 | GACGGCTGTTGAGCAG-1 | 3  | A |
| 845 | GACGTGCGTGCGTCAC-1 | 2  | A |
| 846 | GACTAACCACCCGTGA-1 | 3  | A |
| 847 | GACTAACCAGACACAG-1 | 6  | B |
| 848 | GACTACACACAATCAC-1 | 10 | D |
| 849 | GACTGCGCAGTAGGGT-1 | 5  | A |
| 850 | GACTGCGGTGTCTGTA-1 | 3  | A |
| 851 | GACTGCGTCATATCTC-1 | 10 | D |
| 852 | GACTGCGTCGTAGCGC-1 | 2  | A |

|     |                     |    |   |
|-----|---------------------|----|---|
| 853 | GAGCAGAAGAATCGTA-1  | 3  | A |
| 854 | GAGCAGAAGTTATCGC-1  | 3  | A |
| 855 | GAGCAGATCCGCCTAT-1  | 8  | D |
| 856 | GAGGTGAAGCCGAACA-1  | 5  | A |
| 857 | GAGGTGACACTAACTG-1  | 3  | A |
| 858 | GAGGTGACAGCTATGT-1  | 1  | A |
| 859 | GAGGTGACAGTGAATA-1  | 5  | A |
| 861 | GAGTCCGAGGGTTCGA-1  | 3  | A |
| 862 | GAGTCCGCATACGGTT-1  | 8  | D |
| 863 | GAGTCCGGTACTGCTA-1  | 1  | A |
| 864 | GAGTCCGGTCCTAGTA-1  | 8  | D |
| 865 | GAGTCCGTCAGACACT-1  | 1  | A |
| 866 | GATCAGTCAAGCACGA-1  | 3  | A |
| 867 | GATCAGTTCCACCCAT-1  | 1  | A |
| 868 | GATCAGTTCCGCTCTA-1  | 6  | B |
| 869 | GATCGATGTCCTACCT-1  | 9  | D |
| 870 | GATCGCGAGTCCATAC-1  | 8  | D |
| 871 | GATCGTAAGTAGGCCA-1  | 8  | D |
| 872 | GATCGTACAACCGGAA-1  | 7  | C |
| 873 | GATCGTACATACCAGT-1  | 9  | D |
| 875 | GATCTAGCAAGTGTTT-1  | 10 | D |
| 876 | GATCTAGTCACGCTCT-1  | 1  | A |
| 877 | GATGAAAAGTAATCCC-1  | 10 | D |
| 879 | GATGAAACATGCAGTT-1  | 5  | A |
| 880 | GATGAAAGTAACGGCA-1  | 6  | B |
| 881 | GATGAAAGTTCAGTAC-1  | 5  | A |
| 883 | GATGCTAGTAGGCTGA-1  | 3  | A |
| 884 | GATGCTAGTCTCTCGT-1  | 1  | A |
| 885 | GATGCTAGTTCCCTAC-1  | 10 | D |
| 886 | GATGCTAGTTGGAACG-1  | 6  | B |
| 887 | GATGCTATCACTATGG-1  | 9  | D |
| 888 | GATGCTATCATCAGCA-1  | 8  | D |
| 889 | GATTCAGAGATGTGGC-1  | 10 | D |
| 890 | GATTCAGGTTCAGTGT-1  | 10 | D |
| 891 | GATTCAGTCGACAACT-1  | 4  | A |
| 892 | GCAAACCTAGCCACGTC-1 | 2  | A |
| 893 | GCAAACCTCAAGCCAAG-1 | 11 | D |
| 894 | GCAAACCTCACATTGGT-1 | 8  | D |
| 895 | GCAAACCTCCTACGAA-1  | 9  | D |
| 896 | GCAATCAAGGCAACAC-1  | 6  | B |
| 897 | GCAATCAGTTAGTGAA-1  | 10 | D |
| 898 | GCAATCAGTTGCCTCT-1  | 5  | A |

|     |                     |    |   |
|-----|---------------------|----|---|
| 899 | GCAATCATCCCTGAGG-1  | 5  | A |
| 900 | GCAATCATCCGTTAC-1   | 6  | B |
| 901 | GCACATAGTGAGCGAT-1  | 5  | A |
| 902 | GCACTCTAGACTTTTCG-1 | 11 | D |
| 903 | GCACTCTAGCATCTTG-1  | 11 | D |
| 904 | GCACTCTAGTCCAGGA-1  | 1  | A |
| 905 | GCACTCTCAAGCATGG-1  | 4  | A |
| 906 | GCACTCTTCCACCTTG-1  | 8  | D |
| 908 | GCAGCCACATTGCATG-1  | 6  | B |
| 910 | GCAGCCATCGCTCTAC-1  | 5  | A |
| 911 | GCAGTTAAGGCCCTTG-1  | 11 | D |
| 912 | GCAGTTAGTAGCAGTG-1  | 8  | D |
| 913 | GCAGTTAGTGGAAGGG-1  | 7  | C |
| 914 | GCAGTTATCGCCCAGA-1  | 3  | A |
| 915 | GCATACAAGATCCTGT-1  | 10 | D |
| 916 | GCATACAAGGACAGAA-1  | 6  | B |
| 917 | GCATACACACGTGCGT-1  | 8  | D |
| 918 | GCATACATCAGATGTC-1  | 1  | A |
| 919 | GCATACATCCGCTCTA-1  | 8  | D |
| 920 | GCATGATCACGATAGG-1  | 3  | A |
| 921 | GCATGATCACTCACCT-1  | 10 | D |
| 922 | GCATGATCATGACCGC-1  | 8  | D |
| 923 | GCATGATGTCGCTCAG-1  | 3  | A |
| 924 | GCATGATGTTGCGGTG-1  | 1  | A |
| 925 | GCATGATTCCGTAAAG-1  | 1  | A |
| 926 | GCATGCGAGTAACCCT-1  | 1  | A |
| 927 | GCATGTATCCACAGCG-1  | 9  | D |
| 928 | GCCAAATAGTAAGTAC-1  | 3  | A |
| 930 | GCCAAATCATTGTGG-1   | 1  | A |
| 931 | GCCAAATTCCGCGGAT-1  | 10 | D |
| 932 | GCCAAATTCTACAGTG-1  | 3  | A |
| 933 | GCCTCTAGTACGGTGA-1  | 8  | D |
| 934 | GCCTCTATCACGTAGT-1  | 3  | A |
| 935 | GCGACCACAACATCATG-1 | 2  | A |
| 936 | GCGACCAGTCCTACCT-1  | 6  | B |
| 937 | GCGAGAAAGCTTCAGT-1  | 2  | A |
| 938 | GCGCAGTAGCGATGAC-1  | 1  | A |
| 939 | GCGCAGTGTACTCGTA-1  | 1  | A |
| 940 | GCGCAGTGTGACACGA-1  | 8  | D |
| 941 | GCGCAGTGTGACCAAG-1  | 11 | D |
| 942 | GCGCCAAAGCGAGAAA-1  | 2  | A |
| 943 | GCGCCAAGTTGCCAAT-1  | 1  | A |

|     |                     |    |   |
|-----|---------------------|----|---|
| 944 | GCGCCAATCCTCATCG-1  | 11 | D |
| 945 | GCGCGATAGGACTGGT-1  | 3  | A |
| 946 | GCGCGATAGGATATAC-1  | 8  | D |
| 948 | GCGGGTTAGGAGTTTA-1  | 10 | D |
| 949 | GCGGGTTAGTGTATCC-1  | 5  | A |
| 950 | GCGGGTTTCTATGCCC-1  | 3  | A |
| 951 | GCTCCTAAGATCCCGC-1  | 7  | C |
| 952 | GCTCCTAAGCCCGAAA-1  | 1  | A |
| 953 | GCTCCTATCCCAGAAT-1  | 2  | A |
| 954 | GCTCTGTAGCATGGCA-1  | 3  | A |
| 955 | GCTCTGTAGTTAGCGG-1  | 6  | B |
| 956 | GCTCTGTCAAACCTCAC-1 | 6  | B |
| 957 | GCTCTGTTCACCTCATT-1 | 6  | B |
| 958 | GCTGCAGAGGAGTTGC-1  | 10 | D |
| 959 | GCTGCAGGTAACGTGG-1  | 6  | B |
| 960 | GCTGCAGGTCGCGAAA-1  | 8  | D |
| 961 | GCTGCAGGTTGAACAA-1  | 6  | B |
| 962 | GCTGCGACACCTCCAT-1  | 10 | D |
| 963 | GCTGCGATCACTACAG-1  | 9  | D |
| 964 | GCTGCTTCACGATCTA-1  | 8  | D |
| 965 | GCTGCTTGTCATCTAG-1  | 8  | D |
| 966 | GCTGCTTTCAGTACAC-1  | 10 | D |
| 967 | GCTGGGTAGGCATATA-1  | 8  | D |
| 968 | GCTGGGTCAACTCCGG-1  | 3  | A |
| 969 | GCTGGGTGTGTAGTTC-1  | 5  | A |
| 970 | GCTGGGTGTGTCGCTG-1  | 4  | A |
| 971 | GCTGGGTTCTATGGTG-1  | 1  | A |
| 972 | GCTTCCAAGGGTTTCT-1  | 8  | D |
| 973 | GCTTCCATCCTACGAA-1  | 3  | A |
| 974 | GCTTCCATCTGGCCTT-1  | 8  | D |
| 975 | GCTTCCATCTTCCGAC-1  | 8  | D |
| 976 | GCTTGAACAGTGCTTA-1  | 1  | A |
| 978 | GGAAAGCAGCCAGAAC-1  | 5  | A |
| 979 | GGAAAGCCATGACTCA-1  | 8  | D |
| 980 | GGAAAGCTCCACCTTG-1  | 2  | A |
| 981 | GGAAAGCTCGTGTACA-1  | 11 | D |
| 982 | GGAACCTAGGGTCTCC-1  | 10 | D |
| 984 | GGAACCTGTGCGGAAT-1  | 6  | B |
| 985 | GGAACCTGTTTCCATT-1  | 5  | A |
| 986 | GGAACCTTCCGATACA-1  | 3  | A |
| 988 | GGACAAGAGGGATTTA-1  | 1  | A |
| 989 | GGACAAGGTGTAAAGT-1  | 2  | A |

|      |                     |    |   |
|------|---------------------|----|---|
| 990  | GGACAAGGTTTCAGTAC-1 | 6  | B |
| 991  | GGACAAGTCGACGAAG-1  | 1  | A |
| 992  | GGACAAGTCGCGCACA-1  | 3  | A |
| 993  | GGACAGAAGGTATCGG-1  | 3  | A |
| 994  | GGACAGACAAACCCTA-1  | 10 | D |
| 995  | GGACAGACAGCCAGTC-1  | 1  | A |
| 996  | GGACATTAGTCAAGCG-1  | 6  | B |
| 997  | GGACGTCAGAACTTCC-1  | 1  | A |
| 998  | GGACGTCCACACGTGC-1  | 10 | D |
| 999  | GGAGCAAAGGTGCTTT-1  | 5  | A |
| 1001 | GGATGTTAGCCAGGAT-1  | 5  | A |
| 1002 | GGATGTAGTGACCT-1    | 3  | A |
| 1003 | GGATTACAGCCACCTG-1  | 1  | A |
| 1004 | GGATTACGTACTGTTG-1  | 8  | D |
| 1005 | GGATTACTCCAACAAC-1  | 8  | D |
| 1006 | GGATTACTCTCGGTTC-1  | 2  | A |
| 1007 | GGCAATTGTACAACGG-1  | 2  | A |
| 1008 | GGCAATTGTGCAACCC-1  | 1  | A |
| 1009 | GGCAATTTCTTGGATG-1  | 10 | D |
| 1010 | GGCCGATTCTGACGCG-1  | 2  | A |
| 1011 | GGCGACTGTTACTGAC-1  | 1  | A |
| 1012 | GGCGACTGTTCCGTCT-1  | 6  | B |
| 1013 | GGCGACTGTTGGAACG-1  | 8  | D |
| 1014 | GGCGACTTCCTTATTG-1  | 9  | D |
| 1016 | GGCTCGACAATGGCTT-1  | 5  | A |
| 1017 | GGCTCGACATACTGCA-1  | 10 | D |
| 1019 | GGCTGGTCAACCTGCG-1  | 7  | C |
| 1020 | GGCTGGTTCCTACGAA-1  | 1  | A |
| 1021 | GGCTGGTCTGTGGCG-1   | 4  | A |
| 1022 | GGGAATGCAGATTGTC-1  | 8  | D |
| 1023 | GGGAATGCATCATGGT-1  | 8  | D |
| 1024 | GGGAATGGTGGTACAG-1  | 6  | B |
| 1025 | GGGACCTCATCCATCC-1  | 11 | D |
| 1026 | GGGACCTGTCCGGGT-1   | 3  | A |
| 1027 | GGGACCTTCATCGACA-1  | 6  | B |
| 1028 | GGGAGATAGGCTAGCA-1  | 3  | A |
| 1029 | GGGAGATCACAGACCC-1  | 8  | D |
| 1030 | GGGAGATCAGCGCTTG-1  | 11 | D |
| 1031 | GGGAGATCATGCAGTT-1  | 3  | A |
| 1032 | GGGCACTGTGCAACCC-1  | 10 | D |
| 1033 | GGGCACTGTTCAAGGG-1  | 9  | D |
| 1034 | GGGCATCCACGCTGAC-1  | 1  | A |

|      |                     |    |   |
|------|---------------------|----|---|
| 1035 | GGGCATCGTCTCTATT-1  | 2  | A |
| 1036 | GGGCATCTCGAACCCG-1  | 3  | A |
| 1037 | GGGTCTGCATCGGTCG-1  | 1  | A |
| 1038 | GGGTCTGTCCACGATA-1  | 11 | D |
| 1039 | GGGTTGCGTGTCGCTG-1  | 3  | A |
| 1040 | GGTATTGAGGGTTCGA-1  | 6  | B |
| 1041 | GGTATTGAGGTTCTTA-1  | 8  | D |
| 1042 | GGTGAAGGTATTCGTG-1  | 2  | A |
| 1043 | GGTGCGTCACTAACTG-1  | 6  | B |
| 1044 | GGTGCGTGTGTTTCAG-1  | 1  | A |
| 1045 | GGTGTTAGTCAGTGGA-1  | 6  | B |
| 1046 | GTAACGTAGGCAGTCA-1  | 5  | A |
| 1048 | GTAACGTTCCACAAA-1   | 8  | D |
| 1049 | GTAAGTGAAGCCGTCGT-1 | 2  | A |
| 1050 | GTAAGTGCATAGGGCA-1  | 6  | B |
| 1051 | GTAAGTGGTAGATGCG-1  | 11 | D |
| 1052 | GTAAGTGGTTGAACTC-1  | 8  | D |
| 1053 | GTAAGTGTCGAATGTC-1  | 11 | D |
| 1054 | GTACGTACACTGGCCA-1  | 3  | A |
| 1055 | GTACGTAGTGCGCTTG-1  | 2  | A |
| 1056 | GTACTCCGTCAGTTTG-1  | 3  | A |
| 1057 | GTACTCCGTTGGTATC-1  | 6  | B |
| 1058 | GTACTTTAGAGTAATC-1  | 6  | B |
| 1059 | GTACTTTTCAGGCCGTT-1 | 10 | D |
| 1060 | GTACTTTTCAGTACAC-1  | 11 | D |
| 1061 | GTAGGCCACGTGGCT-1   | 5  | A |
| 1062 | GTAGGCCGTGTAATGA-1  | 3  | A |
| 1063 | GTAGGCCTCCTTGAC-1   | 10 | D |
| 1064 | GTAGGCCTCGTGCTAA-1  | 2  | A |
| 1065 | GTAGGCCTCTCGAGCG-1  | 6  | B |
| 1066 | GTAGTCAGTCATTACG-1  | 1  | A |
| 1067 | GTAGTCATCGAACCCG-1  | 2  | A |
| 1068 | GTATCTTAGGGAGTAA-1  | 3  | A |
| 1069 | GTATCTTAGGGATTTA-1  | 10 | D |
| 1070 | GTATCTTCATTTGTGG-1  | 6  | B |
| 1071 | GTATCTTGTCGCTTCT-1  | 11 | D |
| 1072 | GTATCTTGTCGCTTG-1   | 2  | A |
| 1073 | GTATTCTCATAGGTCT-1  | 10 | D |
| 1074 | GTATTCTCATGCAGTT-1  | 4  | A |
| 1075 | GTCAAGTAGGACCAGT-1  | 6  | B |
| 1076 | GTCACAAAGTGAACAT-1  | 8  | D |
| 1077 | GTCACAAAGTCAGTGGA-1 | 11 | D |

|      |                     |    |   |
|------|---------------------|----|---|
| 1078 | GTCACGGGTATTGAAG-1  | 8  | D |
| 1079 | GTCACGGTCCACAGAT-1  | 1  | A |
| 1080 | GTCATTTAGCAAAGCC-1  | 8  | D |
| 1081 | GTCATTTGTCGCTTCT-1  | 11 | D |
| 1082 | GTCATTTTCCCTTATA-1  | 2  | A |
| 1083 | GTCCTCAGTTTCCTGC-1  | 5  | A |
| 1084 | GTCCTCATCTAAGACC-1  | 11 | D |
| 1085 | GTCGGGTCACAGCTGC-1  | 9  | D |
| 1086 | GTCTCGTCAGGTTAAA-1  | 2  | A |
| 1087 | GTCTCGTCATTCCGAA-1  | 8  | D |
| 1088 | GTCTCGGTACGTGCC-1   | 8  | D |
| 1089 | GTCTCGTTCACACGGC-1  | 2  | A |
| 1090 | GTCTCGTTCATTGCTT-1  | 8  | D |
| 1091 | GTCTTCGAGGTGCTAG-1  | 1  | A |
| 1092 | GTCTTCGAGTGTTGAA-1  | 11 | D |
| 1093 | GTCTTCGTCTGGTAGT-1  | 8  | D |
| 1094 | GTGAAGGGTCCTCGGA-1  | 3  | A |
| 1095 | GTGAAGGGTCTCGTCT-1  | 10 | D |
| 1096 | GTGCAGCAGCTGAAAT-1  | 3  | A |
| 1097 | GTGCAGCCAAAGTTAG-1  | 9  | D |
| 1098 | GTGCAGCGTCCTACCT-1  | 11 | D |
| 1099 | GTGCATACACTTTAT-1   | 2  | A |
| 1100 | GTGCGGTCAATCGTCA-1  | 4  | A |
| 1101 | GTGCGGTCAGATCGAG-1  | 9  | D |
| 1102 | GTGCGGTGTACTCACA-1  | 3  | A |
| 1104 | GTGGGTCCACAGAGCA-1  | 3  | A |
| 1105 | GTGGGTTCGTACCACTA-1 | 2  | A |
| 1106 | GTGGGTTCGTTGGAACG-1 | 3  | A |
| 1107 | GTGGGTCTCCGCTTGT-1  | 11 | D |
| 1108 | GTGGGTCTCCTAGACA-1  | 8  | D |
| 1109 | GTGTGCGAGAAGGTTT-1  | 1  | A |
| 1110 | GTGTGCGAGCGCGATA-1  | 4  | A |
| 1111 | GTGTGCGAGGCTCTCG-1  | 11 | D |
| 1112 | GTGTGCGGTCGCTTCT-1  | 4  | A |
| 1113 | GTTAAGCAGTGTTTGC-1  | 3  | A |
| 1114 | GTTAAGCCAGATATCC-1  | 8  | D |
| 1115 | GTTAAGCTCCACTTAT-1  | 9  | D |
| 1116 | GTTAAGCTCTGTGCGAA-1 | 11 | D |
| 1117 | GTTACAGAGTACACCT-1  | 1  | A |
| 1118 | GTTACAGTCAGGTGAG-1  | 4  | A |
| 1120 | GTTCAATTCGAGTATC-1  | 5  | A |
| 1121 | GTTCAATTCGTAGGGA-1  | 1  | A |

|      |                     |    |   |
|------|---------------------|----|---|
| 1122 | GTTCAATTTCTCTTCCT-1 | 5  | A |
| 1123 | GTTCTGGTCAACAGTC-1  | 11 | D |
| 1124 | GTTCTCGCAACCCACG-1  | 5  | A |
| 1125 | GTTCTCGCACGCACCA-1  | 3  | A |
| 1126 | GTTCTCGCAGTGCTCG-1  | 1  | A |
| 1127 | GTTCTCGGTCATGTTG-1  | 11 | D |
| 1128 | GTTCTCGTCATGACCA-1  | 8  | D |
| 1129 | GTTTCTAAGGTGATTA-1  | 11 | D |
| 1130 | GTTTCTAAGTGGGATC-1  | 8  | D |
| 1131 | GTTTCTAGTCCGGTGT-1  | 6  | B |
| 1132 | GTTTCTATCAGATTCG-1  | 9  | D |
| 1133 | TAAACCGAGGCTAGAC-1  | 6  | B |
| 1134 | TAAACCGAGGTAGCCA-1  | 5  | A |
| 1135 | TAAACCGTCCAAGGGA-1  | 6  | B |
| 1136 | TAAGAGACAGCGTCAC-1  | 10 | D |
| 1137 | TAAGAGACATCTCGTC-1  | 9  | D |
| 1138 | TAAGAGAGTGTGTTCA-1  | 3  | A |
| 1139 | TAAGAGATCCAGGTTA-1  | 3  | A |
| 1140 | TAAGCGTTCATTGGAC-1  | 8  | D |
| 1141 | TAAGTGCAGGGATTCG-1  | 8  | D |
| 1142 | TAAGTGCAGGTAAGTT-1  | 8  | D |
| 1143 | TAAGTGCTCGGGTCAC-1  | 10 | D |
| 1144 | TACACGACAAGCAAGC-1  | 10 | D |
| 1145 | TACACGACACTAGGCC-1  | 3  | A |
| 1146 | TACACGATCCGACCAG-1  | 3  | A |
| 1147 | TACACGATCCGTTCAC-1  | 5  | A |
| 1148 | TACAGTGAGTCCCGAC-1  | 3  | A |
| 1149 | TACAGTGGTCAATTCG-1  | 9  | D |
| 1150 | TACAGTGGTCTAACGT-1  | 1  | A |
| 1151 | TACCTATAGTAGGTGC-1  | 10 | D |
| 1152 | TACCTATGTAAACAGT-1  | 4  | A |
| 1153 | TACCTATGTCAGTTTG-1  | 3  | A |
| 1154 | TACCTATGTTGAACAA-1  | 3  | A |
| 1155 | TACCTTAAGACTGGCA-1  | 6  | B |
| 1156 | TACCTTAAGGAGCGAG-1  | 1  | A |
| 1157 | TACCTTAAGTGAATTG-1  | 1  | A |
| 1158 | TACCTTACATTCCGAA-1  | 1  | A |
| 1159 | TACCTTATCACTCATT-1  | 1  | A |
| 1160 | TACGGATAGCTGAACG-1  | 5  | A |
| 1161 | TACGGATAGTGTTAGA-1  | 1  | A |
| 1162 | TACGGATCAACACCGC-1  | 6  | B |
| 1163 | TACGGATCAGAGGCAT-1  | 5  | A |

|      |                     |    |   |
|------|---------------------|----|---|
| 1165 | TACGGATGTGATGTTC-1  | 10 | D |
| 1166 | TACGGATTCAAGCCGC-1  | 8  | D |
| 1167 | TACGGATTCACACGGC-1  | 6  | B |
| 1168 | TACGGGCAGGTAAGTT-1  | 11 | D |
| 1169 | TACGGGCGTATCTCTT-1  | 5  | A |
| 1170 | TACGGTAAGAACAATC-1  | 10 | D |
| 1171 | TACGGTAAGTTTCCTT-1  | 3  | A |
| 1172 | TACGGTAGTGCTTTCC-1  | 3  | A |
| 1173 | TACGGTATCTCGTGGG-1  | 5  | A |
| 1174 | TACTCATAGAACAATC-1  | 10 | D |
| 1176 | TACTCATAGGCATGGT-1  | 4  | A |
| 1177 | TACTCATCAACGGCTC-1  | 6  | B |
| 1178 | TACTCGCAGAAGGTGA-1  | 3  | A |
| 1180 | TACTCGCCATGATGCT-1  | 5  | A |
| 1181 | TACTCGCTCCACGATA-1  | 6  | B |
| 1182 | TACTTGTAGTGGGTAC-1  | 10 | D |
| 1183 | TACTTGTCAGACACAG-1  | 8  | D |
| 1185 | TACTTGTTTCGGTGC-1   | 10 | D |
| 1186 | TACTTGTTACCGGTG-1   | 10 | D |
| 1188 | TAGACCAAGTCGATAA-1  | 9  | D |
| 1189 | TAGACCACATCCACGG-1  | 1  | A |
| 1190 | TAGACCACATGATGCT-1  | 10 | D |
| 1191 | TAGACCATCATCAGCA-1  | 7  | C |
| 1192 | TAGAGCTAGCTTTCAG-1  | 8  | D |
| 1193 | TAGAGCTAGGCTAGGT-1  | 8  | D |
| 1195 | TAGAGCTCATTGGTCA-1  | 3  | A |
| 1196 | TAGAGCTTCTCAGATG-1  | 3  | A |
| 1197 | TAGCCGGAGTCGTGTT-1  | 8  | D |
| 1198 | TAGCCGGCAACCTCAA-1  | 8  | D |
| 1199 | TAGCCGGCACACACG-1   | 11 | D |
| 1200 | TAGCCGGCACGCTGAC-1  | 10 | D |
| 1201 | TAGCCGGGTTCCACAA-1  | 11 | D |
| 1202 | TAGCCGGTCAGCGGCT-1  | 8  | D |
| 1203 | TAGGCATAGCTAAACA-1  | 4  | A |
| 1204 | TAGGCATAGTAGGTGC-1  | 6  | B |
| 1205 | TAGGCATAGTGAACAT-1  | 8  | D |
| 1206 | TAGGCATCAATCGTCA-1  | 9  | D |
| 1207 | TAGGCATGTCGGCATC-1  | 3  | A |
| 1208 | TAGGCATGTTCAGTAC-1  | 3  | A |
| 1209 | TAGTGGTCAAGTGTTTC-1 | 10 | D |
| 1210 | TAGTGGTCACACACGC-1  | 6  | B |
| 1211 | TAGTGGTGTGTGACAG-1  | 1  | A |

|      |                    |    |   |
|------|--------------------|----|---|
| 1213 | TAGTTGGCATGAGAAT-1 | 5  | A |
| 1214 | TAGTTGGCATGGCACC-1 | 1  | A |
| 1215 | TAGTTGGTCCTGATTT-1 | 5  | A |
| 1216 | TAGTTGGTCGAACCCG-1 | 9  | D |
| 1217 | TATCAGGAGTCCGTAT-1 | 11 | D |
| 1219 | TATCAGGGTTCGAGCC-1 | 7  | C |
| 1220 | TATCAGGGTTCGTCAA-1 | 5  | A |
| 1221 | TATCAGGTCTGGTAGT-1 | 3  | A |
| 1222 | TATCAGGTCTTCTTGA-1 | 11 | D |
| 1223 | TATCTCAAGACTGGGT-1 | 5  | A |
| 1224 | TATCTCAGTAGTGGCA-1 | 3  | A |
| 1225 | TATCTCAGTCCGAAGA-1 | 9  | D |
| 1226 | TATCTCAGTGACCCGT-1 | 8  | D |
| 1227 | TATGCCCAGGGCTTGA-1 | 11 | D |
| 1228 | TATGCCCTCTAGAACC-1 | 3  | A |
| 1229 | TATTACCAGCCAGGAT-1 | 4  | A |
| 1230 | TATTACCGTGCTATTG-1 | 4  | A |
| 1231 | TCAACGAAGAGCAATT-1 | 3  | A |
| 1233 | TCAACGAAGGCTGCTC-1 | 11 | D |
| 1234 | TCAACGATCTTTCGCG-1 | 6  | B |
| 1235 | TCACAAGCATTTCAT-1  | 8  | D |
| 1236 | TCACGAAGTCAAAC-1   | 3  | A |
| 1237 | TCACGAAGTGTCTAAC-1 | 4  | A |
| 1238 | TCAGATGAGAGCCCAA-1 | 8  | D |
| 1239 | TCAGATGTCCGATACA-1 | 5  | A |
| 1240 | TCAGCAAGTAGATGCG-1 | 11 | D |
| 1241 | TCAGCAAGTGTTTCAG-1 | 3  | A |
| 1242 | TCAGCAAGTTGGTGAG-1 | 3  | A |
| 1243 | TCAGCTCAGTTGTCGT-1 | 5  | A |
| 1245 | TCAGGATTCGGGTCAC-1 | 6  | B |
| 1246 | TCAGGTACATAGACAA-1 | 3  | A |
| 1247 | TCAGGTACATGTAGCT-1 | 10 | D |
| 1248 | TCAGGTATCAAGTGCT-1 | 8  | D |
| 1249 | TCATTACAGCCAGTTT-1 | 1  | A |
| 1250 | TCATTACCACAGACCC-1 | 3  | A |
| 1251 | TCATTACCATTCAAGT-1 | 1  | A |
| 1252 | TCATTACTCTCCACAC-1 | 8  | D |
| 1253 | TCATTTGAGTAGCCGA-1 | 8  | D |
| 1254 | TCATTTGAGTCTCGTA-1 | 9  | D |
| 1255 | TCCACACCAAGCAAGC-1 | 6  | B |
| 1256 | TCCACACGTGCTCGAC-1 | 4  | A |
| 1257 | TCCCACTCGCAACGC-1  | 6  | B |

|      |                     |    |   |
|------|---------------------|----|---|
| 1258 | TCCCGATAGAATCGTA-1  | 11 | D |
| 1259 | TCCCGATAGTGCGATG-1  | 9  | D |
| 1260 | TCCCGATGTAAAGTAG-1  | 11 | D |
| 1261 | TCGAGGCAGATCCTGT-1  | 3  | A |
| 1262 | TCGAGGCCACCGAACC-1  | 6  | B |
| 1263 | TCGAGGCCAGTGAAAT-1  | 3  | A |
| 1265 | TCGCGAGAGAGTTGGC-1  | 1  | A |
| 1266 | TCGCGAGGTGATCCTA-1  | 1  | A |
| 1267 | TCGCGAGGTTCAAGAA-1  | 1  | A |
| 1268 | TCGCGAGTCCGCTTGT-1  | 3  | A |
| 1269 | TCGCGAGTCTACGGCG-1  | 2  | A |
| 1270 | TCGCGTTAGACTGGGT-1  | 3  | A |
| 1271 | TCGCGTTAGGACGAAA-1  | 7  | C |
| 1272 | TCGCGTTCAACAACCTC-1 | 3  | A |
| 1273 | TCGCGTTGTCGCGAAA-1  | 8  | D |
| 1274 | TCGCGTTGTCTAGCGC-1  | 2  | A |
| 1276 | TCGGGACAGTCAAGGC-1  | 8  | D |
| 1277 | TCGGGACGTTTCCATT-1  | 11 | D |
| 1278 | TCGGGACTCGTAAGGG-1  | 2  | A |
| 1279 | TCGGTAAGTATACACC-1  | 6  | B |
| 1280 | TCGGTAATCAGAAACA-1  | 7  | C |
| 1281 | TCGTACCCAATCCATG-1  | 9  | D |
| 1282 | TCGTACCCACGTTTAG-1  | 2  | A |
| 1283 | TCGTACCGTGTGACAG-1  | 11 | D |
| 1284 | TCGTAGACAATCCGTA-1  | 4  | A |
| 1285 | TCGTAGAGTGACTGAG-1  | 1  | A |
| 1286 | TCTATTGCAACGAAAT-1  | 11 | D |
| 1287 | TCTATTGCAGAGATCG-1  | 9  | D |
| 1288 | TCTATTGCATGCGTGC-1  | 8  | D |
| 1289 | TCTATTGGTATTCGCA-1  | 1  | A |
| 1290 | TCTATTGGTTGGCGTC-1  | 2  | A |
| 1291 | TCTATTGTCAGCCCGA-1  | 11 | D |
| 1292 | TCTATTGTCATCGACA-1  | 1  | A |
| 1293 | TCTCATAAGCAGCCCT-1  | 10 | D |
| 1294 | TCTCATAAGGGATCTG-1  | 8  | D |
| 1295 | TCTCATAGTGCACACC-1  | 10 | D |
| 1296 | TCTCATATCTAAGACC-1  | 5  | A |
| 1297 | TCTCATATCTGTTGTT-1  | 1  | A |
| 1298 | TCTCTAAAGTAAGTAC-1  | 11 | D |
| 1299 | TCTCTAAGTAGGTTTC-1  | 4  | A |
| 1300 | TCTGAGAAGATCTGCT-1  | 6  | B |
| 1301 | TCTGGAACACGTGGCT-1  | 3  | A |

|      |                     |    |   |
|------|---------------------|----|---|
| 1302 | TCTGGAATCAGCGGCT-1  | 11 | D |
| 1303 | TCTTCGGAGAGGGCTT-1  | 3  | A |
| 1304 | TCTTCGGAGCCAGGAT-1  | 1  | A |
| 1305 | TCTTCGGAGCTATGCT-1  | 10 | D |
| 1306 | TCTTCGGGTCGGATGA-1  | 3  | A |
| 1307 | TCTTTCCCACAGCTAT-1  | 11 | D |
| 1308 | TCTTTCCCCTAGGCC-1   | 5  | A |
| 1309 | TCTTTCCGTGGTGAGT-1  | 4  | A |
| 1311 | TGAAAGAAGGTACTCT-1  | 10 | D |
| 1313 | TGACAACAGCGAACTG-1  | 1  | A |
| 1314 | TGACAACAGCTCCTTC-1  | 10 | D |
| 1315 | TGACGGCAGTTACGGG-1  | 8  | D |
| 1317 | TGACGGCGTCCGATGC-1  | 1  | A |
| 1318 | TGACGGCGTGTCAACT-1  | 8  | D |
| 1319 | TGACTAGGTAGGGTGT-1  | 11 | D |
| 1320 | TGACTAGTCCTCGCTA-1  | 5  | A |
| 1321 | TGACTAGTCGGGCTTG-1  | 1  | A |
| 1323 | TGACTTTAGATTCACC-1  | 1  | A |
| 1324 | TGACTTTAGCAACGGT-1  | 4  | A |
| 1325 | TGACTTTAGGTGTGCA-1  | 6  | B |
| 1326 | TGACTTTAGTACAGTA-1  | 8  | D |
| 1327 | TGAGAGGAGTGTCCAT-1  | 10 | D |
| 1328 | TGAGAGGGTCCCACAG-1  | 2  | A |
| 1329 | TGAGAGGGTCGCGTAC-1  | 3  | A |
| 1330 | TGAGAGGTCTACGGCG-1  | 8  | D |
| 1331 | TGAGCATCATAGGTCT-1  | 9  | D |
| 1332 | TGAGCATCATCGGGCT-1  | 10 | D |
| 1333 | TGAGCATTCTGTATGG-1  | 3  | A |
| 1334 | TGAGCCGAGGCATGGT-1  | 10 | D |
| 1335 | TGAGCCGGTGCTGTAT-1  | 4  | A |
| 1336 | TGAGCCGGTTCCTAC-1   | 10 | D |
| 1337 | TGAGGGACACCAATGT-1  | 4  | A |
| 1338 | TGATTTCTCACGATAC-1  | 5  | A |
| 1339 | TGATTTCTCCGACCAG-1  | 1  | A |
| 1340 | TGCACCTAGTACGCGA-1  | 6  | B |
| 1341 | TGCACCTTCAGCCCGA-1  | 7  | C |
| 1342 | TGCCAAAAGACAGGCT-1  | 10 | D |
| 1343 | TGCCAAACAAGTGTTTC-1 | 3  | A |
| 1344 | TGCCAAACACTACATG-1  | 2  | A |
| 1345 | TGCCCATAGGATGCGT-1  | 1  | A |
| 1346 | TGCCCATAGGCCATAG-1  | 11 | D |
| 1347 | TGCCCATGTACCAGCC-1  | 11 | D |

|      |                    |    |   |
|------|--------------------|----|---|
| 1348 | TGCCCATTCCAACAAC-1 | 11 | D |
| 1349 | TGCCCTAAGCCAAACG-1 | 7  | C |
| 1351 | TGCCCTAGTCGTAATC-1 | 3  | A |
| 1352 | TGCCCTAGTGTAGTTC-1 | 4  | A |
| 1353 | TGCCCTAGTTCTAGAC-1 | 6  | B |
| 1354 | TGCGCAGAGAGGTACC-1 | 6  | B |
| 1356 | TGCGGGTCAGACAGTG-1 | 10 | D |
| 1357 | TGCGGGTCATACGTCA-1 | 8  | D |
| 1358 | TGCGGGTCATCTGTAG-1 | 6  | B |
| 1359 | TGCGGGTTCTATGGTG-1 | 9  | D |
| 1360 | TGCGTGGAGTAGTGCG-1 | 3  | A |
| 1361 | TGCTACCGTACGTCAT-1 | 7  | C |
| 1363 | TGCTGCTTCGGAGAGT-1 | 8  | D |
| 1364 | TGGACGCAGACGCTTT-1 | 8  | D |
| 1365 | TGGACGCCATCGGCGT-1 | 10 | D |
| 1367 | TGGACGCTCGAACCCG-1 | 8  | D |
| 1368 | TGGCCAGGTCCTAGTA-1 | 7  | C |
| 1369 | TGGCCAGTCAAGCCAT-1 | 5  | A |
| 1370 | TGGCGCAGTCGACCAC-1 | 5  | A |
| 1371 | TGGCGCAGTGTCCGAC-1 | 11 | D |
| 1372 | TGGCGCATCCAACCGG-1 | 5  | A |
| 1373 | TGGCGCATCCGGTTCT-1 | 10 | D |
| 1374 | TGGCTGGAGTAAGTAC-1 | 10 | D |
| 1375 | TGGCTGGCAACGCGCT-1 | 4  | A |
| 1377 | TGGGAAGAGGAATGGA-1 | 11 | D |
| 1378 | TGGGAAGCAAGGTGAC-1 | 6  | B |
| 1379 | TGGGAAGGTGGTAACG-1 | 7  | C |
| 1380 | TGGGAAGTCACTTTAC-1 | 3  | A |
| 1381 | TGGGCGTAGGCTCAGA-1 | 3  | A |
| 1382 | TGGGCGTGTTTCCTGC-1 | 3  | A |
| 1383 | TGGGCGTTCACTGTTT-1 | 9  | D |
| 1384 | TGGTTAGAGGGATGGG-1 | 3  | A |
| 1385 | TGGTTAGAGTTAGCGG-1 | 3  | A |
| 1386 | TGGTTAGTCTTATGGG-1 | 3  | A |
| 1387 | TGGTTCCAGACAAAGG-1 | 11 | D |
| 1388 | TGGTTCCAGAGTAAGG-1 | 9  | D |
| 1389 | TGGTTCCAGGTGCACA-1 | 6  | B |
| 1390 | TGGTTCCTCACACCTC-1 | 5  | A |
| 1391 | TGTATTCCAACATAAG-1 | 1  | A |
| 1392 | TGTATTCCAATCGCGC-1 | 1  | A |
| 1393 | TGTCCCACAGTCGGAA-1 | 3  | A |
| 1394 | TGTCCCAGTAGATAGT-1 | 1  | A |

|      |                    |    |   |
|------|--------------------|----|---|
| 1395 | TGTGGTACATTATCGG-1 | 6  | B |
| 1396 | TGTGGTACATTGAAGA-1 | 3  | A |
| 1397 | TGTGGTAGTTTGGGCC-1 | 7  | C |
| 1398 | TGTGGTATCAAGCCGC-1 | 11 | D |
| 1400 | TGTTCCGCATAGAGCG-1 | 2  | A |
| 1401 | TTAACTCCAGCTCATA-1 | 9  | D |
| 1402 | TTAACTCCATGGCTAT-1 | 7  | C |
| 1403 | TTAACTCTCAGTACAC-1 | 11 | D |
| 1404 | TTAACTCTCGATAGTC-1 | 9  | D |
| 1405 | TTAGGACAGAGCTGCA-1 | 1  | A |
| 1406 | TTAGGACAGTTACCCA-1 | 3  | A |
| 1407 | TTAGGACTCTGAAGTC-1 | 11 | D |
| 1408 | TTAGGCAAGGTAAGTT-1 | 11 | D |
| 1409 | TTAGGCACACCAATGT-1 | 5  | A |
| 1410 | TTAGGCAGTAACGACG-1 | 7  | C |
| 1411 | TTAGTTCAGAGCCACA-1 | 1  | A |
| 1412 | TTATGCTAGTGCCATT-1 | 5  | A |
| 1413 | TTATGCTCAGAGACGT-1 | 4  | A |
| 1414 | TTCCCAGAGGAGCGTT-1 | 5  | A |
| 1415 | TTCCCAGCACGATCTA-1 | 8  | D |
| 1417 | TTCCCAGGTTCTCTCG-1 | 3  | A |
| 1418 | TTCCCAGTCCGCCTTA-1 | 9  | D |
| 1419 | TTCGAAGGTACTCGCG-1 | 9  | D |
| 1420 | TTCGGTCAGCGATGAC-1 | 5  | A |
| 1421 | TTCGGTCAGTGAATTG-1 | 1  | A |
| 1422 | TTCGGTCCACTTGAGT-1 | 3  | A |
| 1423 | TTCGGTCCATAGCACT-1 | 11 | D |
| 1424 | TTCTACAAGAGGTAGA-1 | 8  | D |
| 1425 | TTCTACAAGCAGAGAA-1 | 11 | D |
| 1426 | TTCTACAAGTGACTCT-1 | 3  | A |
| 1427 | TTCTACAGTCGCTTCT-1 | 4  | A |
| 1428 | TTCTACAGTCTAACGT-1 | 1  | A |
| 1429 | TTCTACATCTTAGCTT-1 | 8  | D |
| 1430 | TTCTCAAAGGCACATG-1 | 4  | A |
| 1432 | TTCTCAAGTAGGGTGT-1 | 10 | D |
| 1433 | TTCTCAAGTGGCCACT-1 | 1  | A |
| 1434 | TTCTCCTAGACAGACC-1 | 1  | A |
| 1435 | TTCTCCTAGCAGCCCT-1 | 11 | D |
| 1436 | TTCTCCTCATTCGTTT-1 | 1  | A |
| 1437 | TTCTCCTTCATCGCGG-1 | 6  | B |
| 1438 | TTCTTAGAGTACTTGC-1 | 3  | A |
| 1439 | TTGAACGAGAATTGTG-1 | 4  | A |

|      |                     |    |   |
|------|---------------------|----|---|
| 1440 | TTGAACGAGCACGCCT-1  | 3  | A |
| 1441 | TTGAACGAGTGTCCAT-1  | 10 | D |
| 1442 | TTGACTTAGGGCTTCC-1  | 8  | D |
| 1443 | TTGACTTAGTCCGTAT-1  | 10 | D |
| 1444 | TTGCCGTAGAGTAATC-1  | 3  | A |
| 1445 | TTGCCGTAGTCGTGTT-1  | 8  | D |
| 1446 | TTGCCGTGTAAGCGCA-1  | 3  | A |
| 1447 | TTGCCGTGTGCACTTA-1  | 3  | A |
| 1448 | TTGCGTCAGGATGTAT-1  | 4  | A |
| 1449 | TTGCGTCTCATTTGCT-1  | 5  | A |
| 1450 | TTGGAACGTAAGGTGC-1  | 8  | D |
| 1451 | TTGGCAATCATGGTGT-1  | 5  | A |
| 1452 | TTGTAGGAGAGTACAT-1  | 8  | D |
| 1453 | TTGTAGGTCTTCTTGA-1  | 2  | A |
| 1454 | TTTACTGAGAAACGCC-1  | 6  | B |
| 1455 | TTTACTGAGACAGACC-1  | 10 | D |
| 1456 | TTTACTGAGCCCAATT-1  | 2  | A |
| 1458 | TTTACTGGTAACAATG-1  | 4  | A |
| 1459 | TTTACTGTCCACGATA-1  | 3  | A |
| 1460 | TTTATGCAGTAGTATG-1  | 2  | A |
| 1461 | TTTATGCTCTGAAGGG-1  | 1  | A |
| 1462 | TTTCCTCAGCTCCTTC-1  | 10 | D |
| 1463 | TTTCCTCCAACAGCCC-1  | 1  | A |
| 1466 | TTTGCGCAGTGCCATT-1  | 11 | D |
| 1467 | TTTGCGCCAACATCATG-1 | 6  | B |
| 1468 | TTTGCGCTCGATAAGA-1  | 9  | D |
| 1469 | TTTGCGCTCTCATCCG-1  | 1  | A |
| 1470 | TTTGGTTCAAGACGAC-1  | 11 | D |
| 1471 | TTTGGTTGTGATGTTC-1  | 10 | D |
| 1472 | TTTGGTTTCAGATTTCG-1 | 11 | D |
| 1473 | TTTGTCAGTGTGTTCA-1  | 10 | D |
| 1474 | TTTGTCATCACTGCGG-1  | 6  | B |

**Supplementary Table 4 | CNV events by cluster.** Frequency of each of the 114 CNV events that passed filters across the 11 clusters and 4 groups. The start and end headers are the median values of the edges shared across all single cells for that event.

| chrom | start     | end       | ploidy | event | Group A | Group B | Group C | Group D | Cluster 1 | Cluster 2 | Cluster 3 | Cluster 4 | Cluster 5 | Cluster 6 | Cluster 7 | Cluster 8 | Cluster 9 | Cluster 10 | Cluster 11 |
|-------|-----------|-----------|--------|-------|---------|---------|---------|---------|-----------|-----------|-----------|-----------|-----------|-----------|-----------|-----------|-----------|------------|------------|
| 1     | 17200001  | 120520000 | 2      | 13    | 0       | 0.726   | 0.698   | 0.002   | 0         | 0         | 0         | 0         | 0         | 0.726     | 0.698     | 0.006     | 0         | 0          | 0          |
| 1     | 87340001  | 120520000 | 2      | 16    | 0.832   | 0.017   | 0.023   | 0.812   | 0.839     | 0.92      | 0.805     | 0.813     | 0.817     | 0.017     | 0.023     | 0.878     | 0.826     | 0.692      | 0.833      |
| 1     | 800001    | 12920000  | 2      | 14    | 0.021   | 0.88    | 0.907   | 0.03    | 0.007     | 0.034     | 0.018     | 0.04      | 0.025     | 0.88      | 0.907     | 0.035     | 0.029     | 0.015      | 0.038      |
| 1     | 13780001  | 16840000  | 2      | 15    | 0.011   | 0.487   | 0.605   | 0.014   | 0         | 0         | 0.009     | 0.027     | 0.025     | 0.487     | 0.605     | 0.023     | 0.014     | 0.008      | 0.011      |
| 1     | 149860001 | 249220000 | 3      | 54    | 0.115   | 0.12    | 0.047   | 0.109   | 0.161     | 0.08      | 0.086     | 0.12      | 0.133     | 0.12      | 0.047     | 0.087     | 0.101     | 0.12       | 0.124      |
| 1     | 17200001  | 87320000  | 3      | 51    | 0.646   | 0       | 0       | 0.698   | 0.705     | 0.761     | 0.629     | 0.627     | 0.533     | 0         | 0         | 0.738     | 0.87      | 0.504      | 0.737      |
| 1     | 800001    | 12920000  | 3      | 53    | 0.806   | 0.017   | 0       | 0.798   | 0.812     | 0.807     | 0.846     | 0.693     | 0.792     | 0.017     | 0         | 0.837     | 0.797     | 0.737      | 0.806      |
| 1     | 13780001  | 16840000  | 3      | 58    | 0.577   | 0.017   | 0       | 0.571   | 0.57      | 0.216     | 0.588     | 0.573     | 0.833     | 0.017     | 0         | 0.483     | 0.246     | 0.812      | 0.602      |
| 1     | 149860001 | 249160000 | 4      | 83    | 0.547   | 0.564   | 0.535   | 0.521   | 0.537     | 0.716     | 0.593     | 0.56      | 0.342     | 0.564     | 0.535     | 0.651     | 0.594     | 0.301      | 0.532      |
| 2     | 95400001  | 243000000 | 3      | 69    | 0.637   | 0.675   | 0.605   | 0.621   | 0.591     | 0.784     | 0.67      | 0.693     | 0.492     | 0.675     | 0.605     | 0.669     | 0.696     | 0.511      | 0.629      |
| 2     | 20001     | 87060000  | 3      | 71    | 0.559   | 0.556   | 0.442   | 0.571   | 0.604     | 0.795     | 0.624     | 0.52      | 0.233     | 0.556     | 0.442     | 0.674     | 0.797     | 0.165      | 0.683      |
| 2     | 33160001  | 87060000  | 3      | 72    | 0.123   | 0.068   | 0.116   | 0.15    | 0.134     | 0.023     | 0.072     | 0.133     | 0.267     | 0.068     | 0.116     | 0.081     | 0.029     | 0.429      | 0.059      |
| 2     | 20001     | 33120000  | 3      | 73    | 0.124   | 0.12    | 0.209   | 0.125   | 0.121     | 0.023     | 0.081     | 0.133     | 0.275     | 0.12      | 0.209     | 0.058     | 0.043     | 0.368      | 0.043      |
| 3     | 60001     | 24560000  | 2      | 28    | 0.945   | 0.906   | 0.837   | 0.898   | 0.987     | 0.989     | 0.914     | 0.96      | 0.908     | 0.906     | 0.837     | 0.919     | 0.928     | 0.85       | 0.903      |
| 3     | 93520001  | 197860000 | 4      | 92    | 0.593   | 0.65    | 0.372   | 0.564   | 0.685     | 0.739     | 0.633     | 0.507     | 0.35      | 0.65      | 0.372     | 0.605     | 0.696     | 0.353      | 0.629      |
| 3     | 26660001  | 90500000  | 4      | 93    | 0.701   | 0.59    | 0.558   | 0.668   | 0.698     | 0.818     | 0.742     | 0.693     | 0.55      | 0.59      | 0.558     | 0.779     | 0.768     | 0.496      | 0.651      |
| 3     | 24560001  | 26660000  | 9      | 114   | 0.118   | 0.145   | 0.116   | 0.139   | 0.134     | 0.273     | 0.072     | 0.173     | 0.033     | 0.145     | 0.116     | 0.105     | 0.333     | 0.045      | 0.167      |
| 4     | 80001     | 49080000  | 2      | 29    | 0.801   | 0.769   | 0.791   | 0.786   | 0.866     | 0.898     | 0.814     | 0.787     | 0.633     | 0.769     | 0.791     | 0.849     | 0.928     | 0.624      | 0.79       |
| 4     | 52680001  | 190900000 | 4      | 94    | 0.478   | 0.504   | 0.442   | 0.455   | 0.523     | 0.705     | 0.493     | 0.533     | 0.192     | 0.504     | 0.442     | 0.465     | 0.609     | 0.203      | 0.57       |
| 4     | 70300001  | 190900000 | 4      | 96    | 0.044   | 0.051   | 0.093   | 0.068   | 0.034     | 0.023     | 0.05      | 0.027     | 0.075     | 0.051     | 0.093     | 0.076     | 0.087     | 0.053      | 0.065      |
| 4     | 52680001  | 69360000  | 4      | 95    | 0.184   | 0.205   | 0.279   | 0.198   | 0.174     | 0.102     | 0.163     | 0.16      | 0.308     | 0.205     | 0.279     | 0.198     | 0.13      | 0.323      | 0.134      |
| 5     | 70740001  | 180700000 | 2      | 30    | 0.677   | 0.786   | 0.651   | 0.711   | 0.752     | 0.852     | 0.719     | 0.6       | 0.425     | 0.786     | 0.651     | 0.82      | 0.855     | 0.564      | 0.661      |
| 5     | 20001     | 46400000  | 2      | 31    | 0.841   | 0.897   | 0.767   | 0.846   | 0.893     | 0.875     | 0.833     | 0.907     | 0.725     | 0.897     | 0.767     | 0.884     | 0.942     | 0.654      | 0.914      |
| 5     | 49440001  | 68820000  | 2      | 32    | 0.93    | 0.983   | 0.907   | 0.93    | 0.946     | 0.955     | 0.946     | 0.96      | 0.842     | 0.983     | 0.907     | 0.953     | 0.957     | 0.85       | 0.957      |
| 6     | 65300001  | 170920000 | 2      | 33    | 0.046   | 0.248   | 0.14    | 0.021   | 0         | 0.102     | 0.063     | 0.027     | 0.042     | 0.248     | 0.14      | 0.023     | 0.029     | 0.03       | 0.011      |
| 6     | 65300001  | 170920000 | 3      | 74    | 0.625   | 0.521   | 0.488   | 0.641   | 0.725     | 0.659     | 0.615     | 0.693     | 0.45      | 0.521     | 0.488     | 0.808     | 0.623     | 0.414      | 0.656      |
| 6     | 220001    | 58780000  | 3      | 75    | 0.083   | 0.085   | 0.093   | 0.055   | 0.04      | 0.125     | 0.081     | 0.04      | 0.133     | 0.085     | 0.093     | 0.07      | 0.058     | 0.068      | 0.032      |
| 6     | 200001    | 58760000  | 4      | 100   | 0.686   | 0.41    | 0.442   | 0.67    | 0.772     | 0.716     | 0.719     | 0.707     | 0.483     | 0.41      | 0.442     | 0.669     | 0.768     | 0.466      | 0.78       |
| 6     | 61880001  | 65320000  | 4      | 97    | 0.064   | 0.026   | 0.023   | 0.054   | 0.054     | 0.034     | 0.086     | 0.013     | 0.092     | 0.026     | 0.023     | 0.052     | 0.043     | 0.053      | 0.059      |
| 6     | 61880001  | 65300000  | 4      | 98    | 0.121   | 0.034   | 0.093   | 0.082   | 0.141     | 0.102     | 0.14      | 0.147     | 0.058     | 0.034     | 0.093     | 0.093     | 0.116     | 0.083      | 0.059      |
| 6     | 61880001  | 65280000  | 4      | 99    | 0.038   | 0.077   | 0.07    | 0.064   | 0.04      | 0.034     | 0.041     | 0.013     | 0.05      | 0.077     | 0.07      | 0.07      | 0.043     | 0.075      | 0.059      |
| 7     | 150740001 | 159120000 | 2      | 34    | 0.908   | 0.889   | 0.791   | 0.918   | 0.933     | 0.92      | 0.9       | 0.933     | 0.867     | 0.889     | 0.791     | 0.913     | 0.913     | 0.925      | 0.919      |
| 7     | 80001     | 58040000  | 4      | 101   | 0.807   | 0.778   | 0.698   | 0.814   | 0.826     | 0.898     | 0.819     | 0.813     | 0.692     | 0.778     | 0.698     | 0.89      | 0.841     | 0.692      | 0.823      |
| 7     | 76820001  | 125740000 | 4      | 102   | 0.752   | 0.709   | 0.698   | 0.746   | 0.772     | 0.841     | 0.724     | 0.773     | 0.7       | 0.709     | 0.698     | 0.744     | 0.783     | 0.707      | 0.763      |
| 7     | 63260001  | 74140000  | 4      | 103   | 0.939   | 0.923   | 0.884   | 0.912   | 0.966     | 0.966     | 0.946     | 0.907     | 0.892     | 0.923     | 0.884     | 0.936     | 0.971     | 0.872      | 0.898      |
| 7     | 143800001 | 150740000 | 4      | 104   | 0.299   | 0.35    | 0.209   | 0.304   | 0.322     | 0.284     | 0.262     | 0.453     | 0.25      | 0.35      | 0.209     | 0.25      | 0.362     | 0.278      | 0.349      |
| 7     | 144100001 | 150740000 | 4      | 105   | 0.349   | 0.265   | 0.349   | 0.316   | 0.356     | 0.239     | 0.357     | 0.307     | 0.433     | 0.265     | 0.349     | 0.366     | 0.232     | 0.361      | 0.269      |
| 7     | 144160001 | 150720000 | 4      | 106   | 0.074   | 0.06    | 0.07    | 0.066   | 0.074     | 0.08      | 0.109     | 0.013     | 0.042     | 0.06      | 0.07      | 0.047     | 0.101     | 0.068      | 0.07       |

|    |           |           |   |     |       |       |       |       |       |       |       |       |       |       |       |       |       |       |       |
|----|-----------|-----------|---|-----|-------|-------|-------|-------|-------|-------|-------|-------|-------|-------|-------|-------|-------|-------|-------|
| 7  | 126140001 | 143860000 | 6 | 113 | 0.801 | 0.726 | 0.674 | 0.777 | 0.799 | 0.886 | 0.824 | 0.84  | 0.675 | 0.726 | 0.674 | 0.802 | 0.913 | 0.692 | 0.763 |
| 8  | 46880001  | 146300000 | 3 | 76  | 0.717 | 0.752 | 0.07  | 0.005 | 0.752 | 0.875 | 0.715 | 0.747 | 0.542 | 0.752 | 0.07  | 0     | 0.014 | 0.015 | 0     |
| 8  | 124000001 | 43780000  | 3 | 79  | 0.838 | 0.863 | 0.023 | 0     | 0.893 | 0.943 | 0.814 | 0.867 | 0.717 | 0.863 | 0.023 | 0     | 0     | 0     | 0     |
| 8  | 160001    | 7000000   | 3 | 77  | 0.873 | 0.855 | 0.07  | 0     | 0.866 | 0.864 | 0.905 | 0.893 | 0.817 | 0.855 | 0.07  | 0     | 0     | 0     | 0     |
| 8  | 8080001   | 11880000  | 3 | 78  | 0.975 | 0.991 | 0.07  | 0.002 | 0.98  | 0.989 | 0.986 | 0.987 | 0.933 | 0.991 | 0.07  | 0.006 | 0     | 0     | 0     |
| 8  | 46880001  | 146300000 | 4 | 107 | 0.002 | 0.009 | 0.442 | 0.679 | 0     | 0     | 0.005 | 0     | 0     | 0.009 | 0.442 | 0.744 | 0.783 | 0.526 | 0.688 |
| 8  | 124000001 | 43780000  | 4 | 110 | 0     | 0     | 0.535 | 0.859 | 0     | 0     | 0     | 0     | 0     | 0     | 0.535 | 0.855 | 0.928 | 0.782 | 0.892 |
| 8  | 160001    | 7000000   | 4 | 108 | 0     | 0     | 0.512 | 0.862 | 0     | 0     | 0     | 0     | 0     | 0     | 0.512 | 0.866 | 0.899 | 0.827 | 0.871 |
| 8  | 8080001   | 11880000  | 4 | 109 | 0     | 0     | 0.651 | 0.946 | 0     | 0     | 0     | 0     | 0     | 0     | 0.651 | 0.936 | 0.957 | 0.932 | 0.962 |
| 9  | 200001    | 30340000  | 2 | 35  | 0.879 | 0.94  | 0.86  | 0.888 | 0.899 | 0.92  | 0.896 | 0.88  | 0.792 | 0.94  | 0.86  | 0.901 | 0.957 | 0.827 | 0.892 |
| 9  | 710400001 | 1.41E+08  | 3 | 80  | 0.286 | 0.145 | 0.279 | 0.075 | 0.765 | 0.33  | 0.036 | 0.067 | 0.258 | 0.145 | 0.279 | 0.064 | 0.13  | 0.083 | 0.059 |
| 9  | 30340001  | 38760000  | 3 | 81  | 0.06  | 0.051 | 0.302 | 0.062 | 0.02  | 0.114 | 0.045 | 0.08  | 0.083 | 0.051 | 0.302 | 0.052 | 0.116 | 0.068 | 0.048 |
| 9  | 71040001  | 141020000 | 4 | 111 | 0.467 | 0.564 | 0.442 | 0.702 | 0     | 0.455 | 0.765 | 0.733 | 0.342 | 0.564 | 0.442 | 0.756 | 0.696 | 0.602 | 0.726 |
| 9  | 30340001  | 38760000  | 4 | 112 | 0.815 | 0.838 | 0.558 | 0.838 | 0.852 | 0.739 | 0.869 | 0.787 | 0.742 | 0.838 | 0.558 | 0.814 | 0.797 | 0.835 | 0.876 |
| 10 | 494000001 | 135420000 | 2 | 4   | 0.772 | 0.778 | 0.721 | 0.741 | 0.772 | 0.864 | 0.778 | 0.8   | 0.675 | 0.778 | 0.721 | 0.733 | 0.899 | 0.586 | 0.801 |
| 10 | 120001    | 39140000  | 2 | 5   | 0.003 | 0.923 | 0.837 | 0     | 0.007 | 0     | 0     | 0     | 0.008 | 0.923 | 0.837 | 0     | 0     | 0     | 0     |
| 10 | 120001    | 7720000   | 2 | 6   | 0.058 | 0     | 0     | 0.07  | 0.054 | 0.023 | 0.077 | 0.027 | 0.075 | 0     | 0     | 0.087 | 0.058 | 0.03  | 0.086 |
| 10 | 120001    | 7640000   | 2 | 7   | 0.219 | 0     | 0     | 0.243 | 0.195 | 0.159 | 0.186 | 0.373 | 0.258 | 0     | 0     | 0.192 | 0.145 | 0.346 | 0.253 |
| 10 | 120001    | 7580000   | 2 | 8   | 0.147 | 0     | 0     | 0.161 | 0.134 | 0.125 | 0.172 | 0.107 | 0.158 | 0     | 0     | 0.174 | 0.13  | 0.128 | 0.183 |
| 10 | 33360001  | 39140000  | 2 | 9   | 0.115 | 0     | 0     | 0.114 | 0.081 | 0.08  | 0.172 | 0.067 | 0.108 | 0     | 0     | 0.14  | 0.087 | 0.075 | 0.129 |
| 10 | 33380001  | 39140000  | 2 | 10  | 0.21  | 0     | 0     | 0.207 | 0.295 | 0.182 | 0.149 | 0.227 | 0.225 | 0     | 0     | 0.14  | 0.217 | 0.308 | 0.194 |
| 10 | 33420001  | 39140000  | 2 | 11  | 0.06  | 0     | 0     | 0.057 | 0.047 | 0.057 | 0.054 | 0.053 | 0.092 | 0     | 0     | 0.087 | 0.058 | 0.023 | 0.054 |
| 10 | 423800001 | 46160000  | 2 | 12  | 0.939 | 0.949 | 0.814 | 0.932 | 0.919 | 0.875 | 0.955 | 0.96  | 0.967 | 0.949 | 0.814 | 0.942 | 0.942 | 0.932 | 0.919 |
| 10 | 7360001   | 33500000  | 3 | 43  | 0.172 | 0     | 0     | 0.173 | 0.107 | 0.216 | 0.19  | 0.173 | 0.183 | 0     | 0     | 0.186 | 0.232 | 0.09  | 0.199 |
| 10 | 7620001   | 33400000  | 3 | 44  | 0.32  | 0     | 0     | 0.305 | 0.315 | 0.341 | 0.249 | 0.44  | 0.367 | 0     | 0     | 0.25  | 0.304 | 0.459 | 0.247 |
| 10 | 7680001   | 33300000  | 3 | 45  | 0.32  | 0     | 0     | 0.314 | 0.396 | 0.205 | 0.385 | 0.24  | 0.242 | 0     | 0     | 0.366 | 0.261 | 0.18  | 0.382 |
| 11 | 548000001 | 134940000 | 3 | 46  | 0.438 | 0.444 | 0.442 | 0.541 | 0.309 | 0.705 | 0.525 | 0.56  | 0.167 | 0.444 | 0.442 | 0.529 | 0.638 | 0.338 | 0.661 |
| 11 | 81120001  | 134940000 | 3 | 52  | 0.253 | 0.077 | 0.116 | 0.193 | 0.497 | 0.125 | 0.095 | 0.2   | 0.367 | 0.077 | 0.116 | 0.256 | 0.203 | 0.263 | 0.081 |
| 11 | 200001    | 51580000  | 3 | 47  | 0.476 | 0.744 | 0.651 | 0.8   | 0     | 0.602 | 0.756 | 0.8   | 0.258 | 0.744 | 0.651 | 0.82  | 0.826 | 0.774 | 0.79  |
| 11 | 548000001 | 80780000  | 3 | 48  | 0.084 | 0.051 | 0.047 | 0.075 | 0.181 | 0.034 | 0.041 | 0.027 | 0.117 | 0.051 | 0.047 | 0.128 | 0.014 | 0.098 | 0.032 |
| 11 | 548000001 | 80400000  | 3 | 49  | 0.057 | 0.043 | 0.047 | 0.077 | 0.081 | 0.057 | 0.018 | 0.133 | 0.05  | 0.043 | 0.047 | 0.11  | 0.072 | 0.083 | 0.043 |
| 11 | 40840001  | 51580000  | 3 | 50  | 0.15  | 0.06  | 0     | 0.002 | 0.523 | 0.068 | 0     | 0     | 0.117 | 0.06  | 0     | 0.006 | 0     | 0     | 0     |
| 11 | 200001    | 40840000  | 4 | 82  | 0.24  | 0.043 | 0.023 | 0.002 | 0.785 | 0.193 | 0     | 0     | 0.192 | 0.043 | 0.023 | 0     | 0.014 | 0     | 0     |
| 12 | 378600001 | 133840000 | 3 | 55  | 0.689 | 0.709 | 0.465 | 0.738 | 0.732 | 0.795 | 0.724 | 0.667 | 0.508 | 0.709 | 0.465 | 0.837 | 0.928 | 0.556 | 0.704 |
| 12 | 200001    | 34840000  | 3 | 56  | 0.864 | 0.906 | 0.721 | 0.884 | 0.832 | 0.92  | 0.864 | 0.92  | 0.825 | 0.906 | 0.721 | 0.884 | 0.942 | 0.805 | 0.919 |
| 13 | 19280001  | 115080000 | 2 | 17  | 0.075 | 0.017 | 0.023 | 0.059 | 0.067 | 0.091 | 0.068 | 0.027 | 0.117 | 0.017 | 0.023 | 0.058 | 0.116 | 0.045 | 0.048 |
| 13 | 19280001  | 115100000 | 3 | 57  | 0.51  | 0.436 | 0.395 | 0.371 | 0.732 | 0.625 | 0.552 | 0.093 | 0.333 | 0.436 | 0.395 | 0.738 | 0.42  | 0.293 | 0.07  |
| 13 | 19420001  | 115100000 | 4 | 84  | 0.133 | 0.274 | 0.279 | 0.282 | 0.007 | 0.148 | 0.077 | 0.56  | 0.117 | 0.274 | 0.279 | 0.017 | 0.261 | 0.211 | 0.586 |
| 14 | 202000001 | 107280000 | 3 | 59  | 0.135 | 0.111 | 0.07  | 0.1   | 0.027 | 0.864 | 0     | 0.093 | 0.008 | 0.111 | 0.07  | 0     | 0.797 | 0.008 | 0     |
| 14 | 44260001  | 107280000 | 3 | 61  | 0.639 | 0.65  | 0.698 | 0.621 | 0.711 | 0.011 | 0.792 | 0.813 | 0.617 | 0.65  | 0.698 | 0.797 | 0.029 | 0.549 | 0.731 |
| 14 | 202000001 | 43820000  | 3 | 60  | 0.757 | 0.744 | 0.837 | 0.8   | 0.852 | 0     | 0.928 | 0.827 | 0.833 | 0.744 | 0.837 | 0.919 | 0.029 | 0.865 | 0.93  |
| 15 | 309400001 | 82580000  | 2 | 18  | 0.87  | 0.761 | 0.814 | 0.855 | 0.879 | 0.989 | 0.842 | 0.88  | 0.817 | 0.761 | 0.814 | 0.89  | 0.928 | 0.759 | 0.866 |

|    |           |           |   |    |       |       |       |       |       |       |       |       |       |       |       |       |       |       |       |
|----|-----------|-----------|---|----|-------|-------|-------|-------|-------|-------|-------|-------|-------|-------|-------|-------|-------|-------|-------|
| 15 | 23980001  | 28540000  | 2 | 19 | 0.905 | 0.94  | 0.814 | 0.911 | 0.933 | 0.864 | 0.896 | 0.907 | 0.917 | 0.94  | 0.814 | 0.93  | 0.812 | 0.91  | 0.93  |
| 15 | 84920001  | 102400000 | 4 | 85 | 0.874 | 0.88  | 0.86  | 0.905 | 0.906 | 0.875 | 0.878 | 0.853 | 0.842 | 0.88  | 0.86  | 0.907 | 0.913 | 0.902 | 0.903 |
| 16 | 46440001  | 90160000  | 2 | 20 | 0.851 | 0.795 | 0.674 | 0.77  | 0.872 | 0.943 | 0.86  | 0.92  | 0.7   | 0.795 | 0.674 | 0.762 | 0.855 | 0.639 | 0.839 |
| 16 | 80001     | 16280000  | 3 | 62 | 0.711 | 0.803 | 0.326 | 0.268 | 0.819 | 0.727 | 0.828 | 0.013 | 0.783 | 0.803 | 0.326 | 0.529 | 0.261 | 0.241 | 0.048 |
| 16 | 18800001  | 32660000  | 3 | 63 | 0.159 | 0.137 | 0.116 | 0.043 | 0.101 | 0.011 | 0.154 | 0     | 0.45  | 0.137 | 0.116 | 0.064 | 0     | 0.098 | 0     |
| 16 | 80001     | 16280000  | 4 | 86 | 0.11  | 0.043 | 0.465 | 0.582 | 0     | 0.102 | 0.014 | 0.733 | 0.042 | 0.043 | 0.465 | 0.314 | 0.536 | 0.556 | 0.866 |
| 17 | 25280001  | 81100000  | 3 | 64 | 0.787 | 0.795 | 0.721 | 0.734 | 0.846 | 0.909 | 0.824 | 0.44  | 0.775 | 0.795 | 0.721 | 0.872 | 0.841 | 0.684 | 0.602 |
| 17 | 40001     | 22240000  | 3 | 65 | 0.868 | 0.897 | 0.791 | 0.82  | 0.913 | 0.943 | 0.946 | 0.573 | 0.8   | 0.897 | 0.791 | 0.93  | 0.841 | 0.789 | 0.731 |
| 17 | 25280001  | 81080000  | 4 | 87 | 0.046 | 0.017 | 0.07  | 0.075 | 0     | 0.011 | 0     | 0.333 | 0.033 | 0.017 | 0.07  | 0     | 0.058 | 0.045 | 0.172 |
| 17 | 20001     | 22240000  | 4 | 88 | 0.043 | 0.017 | 0.07  | 0.091 | 0.007 | 0.011 | 0     | 0.32  | 0.017 | 0.017 | 0.07  | 0.006 | 0.072 | 0.068 | 0.194 |
| 18 | 18540001  | 7.80E+07  | 2 | 21 | 0.006 | 0.803 | 0.791 | 0.004 | 0     | 0.023 | 0.005 | 0     | 0.008 | 0.803 | 0.791 | 0.006 | 0     | 0.008 | 0     |
| 18 | 140001    | 15200000  | 2 | 22 | 0.002 | 0.923 | 0.93  | 0.002 | 0.007 | 0     | 0     | 0     | 0     | 0.923 | 0.93  | 0     | 0     | 0.008 | 0     |
| 18 | 140001    | 10060000  | 2 | 23 | 0.086 | 0     | 0     | 0.109 | 0.081 | 0.102 | 0.086 | 0.147 | 0.042 | 0     | 0     | 0.157 | 0.116 | 0.105 | 0.065 |
| 18 | 140001    | 9940000   | 2 | 24 | 0.067 | 0     | 0     | 0.061 | 0.101 | 0.034 | 0.05  | 0.08  | 0.075 | 0     | 0     | 0.058 | 0.043 | 0.068 | 0.065 |
| 18 | 140001    | 9880000   | 2 | 25 | 0.179 | 0     | 0     | 0.205 | 0.154 | 0.114 | 0.163 | 0.253 | 0.242 | 0     | 0     | 0.163 | 0.13  | 0.293 | 0.21  |
| 18 | 140001    | 9840000   | 2 | 26 | 0.107 | 0     | 0     | 0.096 | 0.128 | 0.068 | 0.113 | 0.053 | 0.133 | 0     | 0     | 0.11  | 0.159 | 0.053 | 0.091 |
| 18 | 140001    | 9760000   | 2 | 27 | 0.089 | 0     | 0     | 0.075 | 0.081 | 0.068 | 0.081 | 0.12  | 0.108 | 0     | 0     | 0.099 | 0.087 | 0.075 | 0.048 |
| 18 | 18540001  | 78000000  | 3 | 66 | 0.812 | 0.051 | 0.047 | 0.773 | 0.859 | 0.784 | 0.842 | 0.88  | 0.675 | 0.051 | 0.047 | 0.756 | 0.899 | 0.639 | 0.839 |
| 19 | 27740001  | 59100000  | 3 | 67 | 0.848 | 0.863 | 0.814 | 0.848 | 0.872 | 0.909 | 0.891 | 0.813 | 0.717 | 0.863 | 0.814 | 0.826 | 0.87  | 0.805 | 0.892 |
| 19 | 260001    | 24600000  | 3 | 68 | 0.868 | 0.846 | 0.767 | 0.846 | 0.893 | 0.92  | 0.896 | 0.8   | 0.792 | 0.846 | 0.767 | 0.895 | 0.884 | 0.782 | 0.833 |
| 20 | 29420001  | 62900000  | 4 | 89 | 0.827 | 0.838 | 0.744 | 0.9   | 0.859 | 0.864 | 0.814 | 0.88  | 0.75  | 0.838 | 0.744 | 0.936 | 0.928 | 0.835 | 0.903 |
| 20 | 60001     | 26320000  | 4 | 90 | 0.862 | 0.88  | 0.814 | 0.88  | 0.852 | 0.886 | 0.896 | 0.84  | 0.808 | 0.88  | 0.814 | 0.907 | 0.942 | 0.797 | 0.892 |
| 21 | 15220001  | 48060000  | 3 | 70 | 0.865 | 0.769 | 0.791 | 0.852 | 0.852 | 0.875 | 0.878 | 0.947 | 0.8   | 0.769 | 0.791 | 0.843 | 0.913 | 0.827 | 0.855 |
| 22 | 16860001  | 51180000  | 4 | 91 | 0.842 | 0.829 | 0.698 | 0.82  | 0.846 | 0.909 | 0.896 | 0.853 | 0.683 | 0.829 | 0.698 | 0.849 | 0.826 | 0.699 | 0.876 |
| X  | 92380001  | 155240000 | 2 | 36 | 0.655 | 0.726 | 0.488 | 0.632 | 0.812 | 0.841 | 0.756 | 0.68  | 0.125 | 0.726 | 0.488 | 0.634 | 0.797 | 0.398 | 0.737 |
| X  | 300001    | 58560000  | 2 | 42 | 0.069 | 0.034 | 0.047 | 0.066 | 0.047 | 0.318 | 0.014 | 0.08  | 0.008 | 0.034 | 0.047 | 0.023 | 0.304 | 0.03  | 0.043 |
| X  | 114420001 | 155240000 | 2 | 37 | 0.167 | 0.137 | 0.14  | 0.175 | 0.06  | 0.045 | 0.095 | 0.12  | 0.55  | 0.137 | 0.14  | 0.174 | 0.058 | 0.323 | 0.113 |
| X  | 300001    | 31300000  | 2 | 38 | 0.783 | 0.821 | 0.651 | 0.789 | 0.812 | 0.5   | 0.878 | 0.827 | 0.75  | 0.821 | 0.651 | 0.895 | 0.522 | 0.722 | 0.839 |
| X  | 61720001  | 88460000  | 2 | 39 | 0.934 | 0.957 | 0.767 | 0.927 | 0.953 | 0.966 | 0.941 | 0.893 | 0.9   | 0.957 | 0.767 | 0.948 | 0.942 | 0.887 | 0.93  |
| X  | 32300001  | 58560000  | 2 | 40 | 0.848 | 0.923 | 0.698 | 0.834 | 0.913 | 0.602 | 0.932 | 0.827 | 0.808 | 0.923 | 0.698 | 0.919 | 0.638 | 0.805 | 0.849 |
| X  | 92380001  | 114200000 | 2 | 41 | 0.103 | 0.068 | 0.116 | 0.123 | 0.04  | 0.045 | 0.032 | 0.08  | 0.367 | 0.068 | 0.116 | 0.128 | 0.043 | 0.248 | 0.059 |
| Y  | 13460001  | 19560000  | 0 | 1  | 0.982 | 0.974 | 1     | 0.98  | 0.973 | 1     | 0.982 | 1     | 0.967 | 0.974 | 1     | 1     | 0.986 | 0.94  | 0.989 |
| Y  | 20800001  | 24520000  | 0 | 2  | 1     | 1     | 1     | 1     | 1     | 1     | 1     | 1     | 1     | 1     | 1     | 1     | 1     | 1     | 1     |
| Y  | 6620001   | 10080000  | 0 | 3  | 1     | 1     | 1     | 1     | 1     | 1     | 1     | 1     | 1     | 1     | 1     | 1     | 1     | 1     | 1     |

**Supplementary file 1 | R script to perform Clustering of single cell CNV data, generating a CNV mutation matrix with polymorphic events.**

```
library(GenomicRanges)
library(dplyr)

# path to outs folder
PATH_2_OUTS <- "YOUR_PATH"

# read the per cell summary
per_cell_summary <- read.table(file.path(PATH_2_OUTS,"per_cell_summary_metrics.csv"), sep=";",header =
TRUE)

# define inputs and cutoffs
cells <- per_cell_summary$cell_id[per_cell_summary$is_noisy==0]
cells <- paste0("cell_",cells)
NCELLS <- length(cells)
EVENT_QUAL = 15
EVENT_SIZE = 2e6
EVENT_FREQ = .05
CUTOFF_N <- round(NCELLS*EVENT_FREQ)

# read bed file and subset to keep events only from
#terminal nodes that are not flagged as noisy
get_bed <- function(path_2_outs){
  df <- read.table(file.path(path_2_outs,"node_cnv_calls.bed"),header=FALSE,sep="\t")
  names(df) <- c("chrom", "start", "end", "node", "ploidy", "qual")
  nnodes <- max(df$node)
  ncells <- nnodes/2
  df$node <- ifelse(df$node>ncells,paste0("inode_",df$node),paste0("cell_",df$node))
  return(df)
}

bed <- get_bed(PATH_2_OUTS)
bed <- subset(bed,node %in% cells)
bed.gr <- makeGRangesFromDataFrame(bed, keep.extra.columns=TRUE,
                                ignore.strand=TRUE,
                                seqinfo=NULL,
                                seqnames.field="chrom",
                                start.field="start",
                                end.field="end",
                                starts.in.df.are.0based=TRUE)

# apply a quality and size cut off and
# order the events going from largest to smallest
bed.gr <- bed.gr[bed.gr$qual>EVENT_QUAL]
bed.gr <- bed.gr[width(bed.gr) > EVENT_SIZE]
bed.gr <- bed.gr[order(-width(bed.gr),start(bed.gr))]

#split bed file by ploidy and chromosome
bed.gr <- split(bed.gr,bed.gr$ploidy)
```

```

split.bed.gr <- lapply(bed.gr, function(x) split(x,seqnames(x)))

# find pairwise 90% reciprocal overlaps with the same ploidy
events.byploidy <- list()
for (i in seq_along(split.bed.gr)){
  gr <- split.bed.gr[[i]]
  hits <- lapply(gr, function(x) findOverlaps(x,drop.self=FALSE,drop.redundant=TRUE,type="any",select="all"))
  xhits <- lapply(seq_along(gr), function(x) gr[[x]][queryHits(hits[[x]])])
  yhits <- lapply(seq_along(gr), function(x) gr[[x]][subjectHits(hits[[x]])])
  pmax <- lapply(seq_along(gr), function(x) pmax(width(yhits[[x]]),width(xhits[[x]])))
  overlaps <- lapply(seq_along(gr), function(x) pintersect(xhits[[x]],yhits[[x]]))
  frac <- lapply(seq_along(gr), function(x) width(overlaps[[x]])/pmax[[x]])
  merge <- lapply(frac, function(x) x>=0.9)

  final <- list()
  for(j in seq_along(gr)){
    tokeep <- yhits[[j]][merge[[j]]]
    tokeep$qhit <- queryHits(hits[[j]])[merge[[j]]]
    tokeep$subhit <- subjectHits(hits[[j]])[merge[[j]]]
    #the same subject hit is being grouped multiple times and supporting different queries
    tokeep <- tokeep[!duplicated(tokeep$subhit)]
    qcount <- table(tokeep$qhit)
    tokeep <- tokeep[tokeep$qhit %in% names(qcount[qcount>CUTOFF_N])]
    final[[j]] <- tokeep
  }
  final <- do.call("c",final)
  events.byploidy[[i]] <- final
}

# generate unique labels for shared events
label.qhit <- sapply(events.byploidy, function(x) paste0(x$qhit))
label.chr <- sapply(events.byploidy, function(x) as.vector(seqnames(x)))
label <- sapply(seq_along(label.qhit), function(i) paste0(label.chr[[i]],label.qhit[[i]]))
label <- sapply(seq_along(label),function(i) paste0("ploidy",i-1,"_chr",label[[i]]))
label <- unlist(label)
tokeep <- sapply(label,function(x) grepl("ploidy\\d+_chr[XY]*\\d+",x))
label <- label[tokeep]
label <- factor(label,labels = 1:length(unique(label)))

# make a single GenomicRanges object
events.05.gr <- do.call("c",events.byploidy)
events.05.gr$event <- label
events.05.gr$qhit <- NULL
events.05.gr$subhit <- NULL
rm(events.byploidy)

```

**Supplementary file 2** | Python script to split BAM files by barcode assignment, generating a BAM file for each sub-clone.

```
import pysam
import pandas as pd
import sys
import os
import argparse

def parse_args():
    parser = argparse.ArgumentParser()
    parser.add_argument('--bam', help='Input BAM file')
    parser.add_argument('--out-root', help='Root directory to write output BAMs to')
    parser.add_argument('--csv', help='CSV file with two columns: barcode and cluster.')
    return parser.parse_args()

if __name__ == '__main__':
    args = parse_args()
    df = pd.read_csv(args.csv)
    assert 'barcode' in df.columns and 'cluster' in df.columns, 'Missing column identifiers'
    assert os.path.exists(args.bam), 'Cannot find input BAM'
    fh = pysam.Samfile(args.bam)
    cluster_map = dict(zip(df.barcode, df.cluster))
    os.makedirs(args.out_root)
    out_handles = {}
    for c in set(df.cluster):
        o = pysam.Samfile(os.path.join(args.out_root, 'cluster' + str(c) + '.bam'), 'wb', template=fh)
        out_handles[c] = o
    for rec in fh:
        if rec.has_tag('CB') and rec.get_tag('CB') in cluster_map:
            cluster = cluster_map[rec.get_tag('CB')]
            out_handles[cluster].write(rec)
    for h in out_handles.values():
        h.close()
```
